# Supplementary material for: Combined forces of hydrostatic pressure and actin polymerization drive endothelial tip cell migration and sprouting angiogenesis
Source: eLife. 2025 Feb 20;13:RP98612. doi: 10.7554/eLife.98612 (PMC11841990; doi:10.7554/eLife.98612)
Supplement: Figure 1—source data 1. [file elife-98612-fig1-data1.xlsx]

## Sheet: Figure 1G
	Figure 1 - Source Data 1
	Figure 1G: expression of aqp1a.1 and aqp8a.1 mRNAs in tip and stalk cells of 22 hpf embryos.
		Area	Mean	IntDen	CTCF	Ratio			Area	Mean	IntDen	CTCF	Ratio			Area	Mean	IntDen	CTCF	Ratio			Area	Mean	IntDen	CTCF	Ratio			Tip cell > stalk cell	Tip cell = stalk cell	Tip cell < Stalk cell
	Embryo #1							Embryo #4							Embryo #6							Embryo #7								(ratio > 1.1)	(ratio 0.9-1.1)	(ration < 0.9)
	vessel #1							vessel #1							vessel #1							vessel #1							aqp1a.1	1.386	1.005	0.632
	aqp1a.1					1.005		aqp1a.1					1.221		aqp1a.1					3.019		aqp1a.1					2.488			6.435	0.93	0.852
	tip cell	271.997	1111.96	302450	296610			tip cell	174.966	893.505	156333	154860			tip cell	132.643	99.038	13136.7	9704			tip cell	144.045	128.472	18505.8	10266				4.356	1.076	0.861
	stalk cell	267.148	1126.5	300943	295207			stalk cell	145.698	879.014	128070	126844			stalk cell	100.862	57.751	5824.88	3215			stalk cell	68.384	117.548	8038.41	4127				2.198	0.975	0.582
	background		21.47	1723				background		8.415	763.807				background		25.878	2015.63				background		57.203	4943.38					3.395	1.04
	aqp8a.1					0.094		aqp8a.1					0.743		aqp8a.1					0.134		aqp8a.1					0.416			1.221
	tip cell	271.997	12.348	3359	3169			tip cell	174.966	23.257	4069.15	2634			tip cell	132.643	26.724	3544.72	1315			tip cell	144.045	44.636	6429.55	1592				1.822
	stalk cell	267.148	126.751	33861	33675			stalk cell	145.698	32.538	4740.77	3545			stalk cell	100.862	114.157	11514	9819			stalk cell	68.384	89.525	6122.09	3826				1.22
	background		0.697	56				background		8.205	744.753				background		16.81	1309.3				background		33.582	2902.08					1.38
																														1.815
	vessel #2							vessel #2							vessel #2															3.019
	aqp1a.1					1.386		aqp1a.1					0.582		aqp1a.1					2.978										2.978
	tip cell	268.908	799.299	214938	213166			tip cell	192.69	1128.42	217434	205125			tip cell	146.984	144.231	21199.6	16505											1.253
	stalk cell	153.508	1008.18	154764	153753			stalk cell	140.119	2577.13	361104	352153			stalk cell	104.863	84.791	8891.41	5542											2.488
	background		6.587	589				background		63.882	6925.03				background		31.938	2208.4												(60.9%)	(21.7%)	(17.4%)
	aqp8a.1					0.348		aqp8a.1					0.151		aqp8a.1					0.529									aqp8a.1	1.711	0.996	0.094
	tip cell	268.908	32.742	8805	8074			tip cell	192.69	94.666	18241.2	1844			tip cell	146.984	76.353	11222.7	7486											1.504	1.05	0.348
	stalk cell	153.508	153.954	23633	23216			stalk cell	140.119	172.123	24117.6	12194			stalk cell	104.863	160.437	16823.9	14158											1.601		0.392
	background		2.719	243				background		85.094	9224.52				background		25.423	1757.94														0.11
																																0.358
	vessel #3							vessel #3							vessel #3																	0.362
	aqp1a.1					0.632		aqp1a.1					1.04		aqp1a.1					1.253												0.424
	tip cell	168.657	961.07	162091	159283			tip cell	169.258	2196.47	371771	360523			tip cell	94.406	124.166	11722	8631													0.332
	stalk cell	151.362	1681.46	254510	251989			stalk cell	156.255	2283.94	356877	346493			stalk cell	66.955	135.626	9080.89	6889													0.043
	background		16.654	1300				background		66.459	10139.3				background		32.742	2105.87														0.743
	aqp8a.1					0.392		aqp8a.1					0.7		aqp8a.1					1.05												0.151
	tip cell	168.657	58.89	9932	8260			tip cell	169.258	111.739	18912.7	10288			tip cell	94.406	62.781	5926.88	3931													0.673
	stalk cell	151.362	149.013	22555	21054			stalk cell	156.255	145.028	22661.3	14699			stalk cell	66.955	77.045	5158.61	3743													0.779
	background		9.915	774				background		50.959	7774.5				background		21.137	1359.48														0.134
																																0.529
		Area	Mean	IntDen	CTCF	Ratio			Area	Mean	IntDen	CTCF	Ratio			Area	Mean	IntDen	CTCF	Ratio			Area	Mean	IntDen	CTCF	Ratio					0.416
	Embryo #2							Embryo #3							Embryo #5							Embryo #8										0.477
	vessel #1							vessel #1							vessel #1							vessel #1										0.7
	aqp1a.1					0.852		aqp1a.1					4.356		aqp1a.1					1.822		aqp1a.1					0.975			(13.0%)	(8.7%)	(78.3%)
	tip cell	206.68	931.766	192578	179309			tip cell	239.725	1079.12	258692	245125			tip cell	114.821	250.856	28803.6	21086			tip cell	75.317	93.079	7010.38	4337
	stalk cell	139.303	1575.44	219464	210521			stalk cell	118.704	530.642	62989	56271			stalk cell	52.094	289.326	15072.2	11571			stalk cell	85.935	87.249	7497.71	4448
	background		64.201	6414				background		56.594	4712				background		67.21	3811.06				background		35.493	1760.02
	aqp8a.1					0.11		aqp8a.1					0.424		aqp8a.1					0.996		aqp8a.1					0.477
	tip cell	206.68	101.546	20988	1192			tip cell	239.725	144.215	34572	4981			tip cell	114.821	36.157	4151.63	2116			tip cell	75.317	22.289	1678.74	1617
	stalk cell	139.303	173.736	24202	10859			stalk cell	118.704	222.389	26398	11746			stalk cell	52.094	58.514	3048.23	2125			stalk cell	85.935	40.279	3461.4	3391
	background		95.781	9569				background		123.438	10277				background		17.731	1005.39				background		0.817	40.509
	vessel #2							vessel #2							vessel #2
	aqp1a.1					6.435		aqp1a.1					2.198		aqp1a.1					1.22
	tip cell	218.954	1398.51	306209	291236			tip cell	240.669	925.688	222785	209672			tip cell	109.985	249.116	27399	20081
	stalk cell	137.329	397.92	54646	45255			stalk cell	195.007	543.677	106021	95397			stalk cell	70.627	299.507	21153.2	16454
	background		68.386	5259				background		54.483	5675				background		66.536	4649.46
	aqp8a.1					-0.358		aqp8a.1					0.332		aqp8a.1					0.673
	tip cell	218.954	131.885	28877	-4222			tip cell	240.669	214.428	51606	18552			tip cell	109.985	35.52	3906.72	2122
	stalk cell	137.329	237.079	32558	11798			stalk cell	195.007	423.74	82632	55850			stalk cell	70.627	60.883	4299.96	3154
	background		151.168	11625				background		137.342	14305				background		16.225	1133.78
	vessel #3							vessel #3							vessel #3
	aqp1a.1					0.861		aqp1a.1					1.076		aqp1a.1					1.38
	tip cell	198.483	829.714	164685	150324			tip cell	202.217	584.915	118280	106701			tip cell	119.643	143.033	17113	10108
	stalk cell	152.779	1215	185625	174571			stalk cell	111.623	945.986	105594	99202			stalk cell	60.25	180.111	10851.7	7324
	background		72.353	5052				background		57.26	4595				background		58.546	2453.58
	aqp8a.1					0.36		aqp8a.1					0.043		aqp8a.1					1.601
	tip cell	198.483	155.623	30889	6809			tip cell	202.217	143.051	28927	748			tip cell	119.643	18.44	2206.18	436
	stalk cell	152.779	245.168	37456	18922			stalk cell	111.623	296.783	33128	17573			stalk cell	60.25	19.315	1163.74	272
	background		121.316	8471				background		139.353	11183				background		14.798	620.171
	vessel #4							vessel #4							vessel #4
	aqp1a.1					0.93		aqp1a.1					3.395		aqp1a.1					1.815
	tip cell	220.971	548.056	121105	107641			tip cell	200.458	1240.29	248626	237911			tip cell	113.686	169.357	19253.5	13500
	stalk cell	115.871	1059.88	122810	115750			stalk cell	121.021	632.583	76556	70087			stalk cell	86.352	136.765	11810	7440
	background		60.928	4422				background		53.453	4058				background		50.609	3860.32
	aqp8a.1					1.711		aqp8a.1					1.504		aqp8a.1					0.779
	tip cell	220.971	197.55	43653	25380			tip cell	200.458	150.864	30242	6241			tip cell	113.686	29.819	3389.95	1655
	stalk cell	115.871	210.716	24416	14834			stalk cell	121.021	154.007	18638	4148			stalk cell	86.352	39.85	3441.16	2123
	background		82.692	6001				background		119.729	9090				background		15.263	1164.22
	Area - area of selection in square micrometers.
	Mean - average gray value within the selection.
	IntDen - integrated density (the product of Area and Mean gray value).
	CTCF - corrected total cell fluorescence. CTCF = IntDen - (Area x Mean of background)
	Ratio = CTCF of tip cell / CTCF of stalk cell

## Sheet: Figure 1H
	Figure 1 - Source Data 1
	Figure 1H: qPCR analysis of aqp1a.1, aqp8a.1, dll4 and tm4sf18 mRNAs expression in zebrafish embryos treated with 1 µM Ki8751 at 20 hpf.
	Experiment 1												Experiment 2												Experiment 3
	aqp1a.1	Treatment	Ct target gene	Avg Ct target gene	Avg Ct target control	△Ct target gene	Ct ref. gene	Avg Ct ref. gene	Avg Ct ref. control	△Ct ref. gene	ratio		aqp1a.1	Treatment	Ct target gene	Avg Ct target gene	Avg Ct target control	△Ct target gene	Ct ref. gene	Avg Ct ref. gene	Avg Ct ref. control	△Ct ref. gene	ratio		aqp1a.1	Treatment	Ct target gene	Avg Ct target gene	Avg Ct target control	△Ct target gene	Ct ref. gene	Avg Ct ref. gene	Avg Ct ref. control	△Ct ref. gene	ratio		ANOVA result
	Group 1	DMSO	21.096	21.067	21.257	0.19	17.525	17.421	17.827	0.406	0.872		Group 1	DMSO	21.632	21.687	21.504	-0.183	18.186	18.154	18.11	-0.045	0.912		Group 1	DMSO	20.986	20.877	21.203	0.326	17.397	17.391	17.678	0.287	1.031		Brown-Forsythe ANOVA test
			20.982				17.432								21.675				18.154								20.794				17.456						F* (DFn, DFd)	57.67 (7.000, 25.93)
			21.122				17.304								21.755				18.124								20.85				17.32						P value	<0.0001
	Group 2	DMSO	21.447	21.342		-0.085	17.983	17.995		-0.169	1.054		Group 2	DMSO	21.496	21.475		0.029	18.195	18.152		-0.043	1.048		Group 2	DMSO	21.374	21.267		-0.063	17.775	17.759		-0.081	1.01		P value summary	****
			21.383				17.946								21.584				18.128								21.25				17.758						Significant diff. among means (P < 0.05)?	Yes
			21.195				18.057								21.345				18.134								21.177				17.743
	Group 3	DMSO	21.383	21.363		-0.106	18.052	18.064		-0.238	1.087		Group 3	DMSO	21.33	21.35		0.154	18.001	18.022		0.087	1.047		Group 3	DMSO	21.514	21.466		-0.263	17.936	17.883		-0.206	0.96		Welch's ANOVA test
			21.294				18.074								21.406				17.975								21.406				17.888						W (DFn, DFd)	88.80 (7.000, 25.31)
			21.411				18.067								21.313				18.09								21.479				17.826						P value	<0.0001
	Group 1	Ki8751	22.623	22.56		-1.303	17.656	17.623		0.204	0.37		Group 1	Ki8751	22.079	22.039		-0.535	17.638	17.637		0.473	0.517		Group 1	Ki8751	22.53	22.381		-1.178	17.759	17.695		-0.017	0.463		P value summary	****
			22.581				17.63								22.07				17.582								22.34				17.62						Significant diff. among means (P < 0.05)?	Yes
			22.478				17.584								21.967				17.69								22.274				17.706
	Group 2	Ki8751	22.171	22.251		-0.994	17.928	17.82		0.007	0.515		Group 2	Ki8751	22.32	22.37		-0.866	17.735	17.713		0.396	0.436		Group 2	Ki8751	22.796	22.675		-1.471	18.171	18.161		-0.483	0.516		Data summary
			22.343				17.791								22.45				17.631								22.652				18.219						Number of treatments (columns)	8
			22.239				17.74								22.341				17.774								22.575				18.094						Number of values (total)	68
	Group 3	Ki8751	22.829	22.702		-1.445	18.156	18.093		-0.266	0.456		Group 3	Ki8751	22.577	22.513		-1.009	18.199	18.161		-0.051	0.53		Group 3	Ki8751	22.632	22.55		-1.346	18.063	18.004		-0.326	0.506
			22.656				18.115								22.451				18.213								22.489				17.965
			22.622				18.007								22.51				18.07								22.527				17.984
	aqp8a.1	Treatment	Ct target gene	Avg Ct target gene	Avg Ct target control	△Ct target gene	Ct ref. gene	Avg Ct ref. gene	Avg Ct ref. control	△Ct ref. gene	ratio		aqp8a.1	Treatment	Ct target gene	Avg Ct target gene	Avg Ct target control	△Ct target gene	Ct ref. gene	Avg Ct ref. gene	Avg Ct ref. control	△Ct ref. gene	ratio		aqp8a.1	Treatment	Ct target gene	Avg Ct target gene	Avg Ct target control	△Ct target gene	Ct ref. gene	Avg Ct ref. gene	Avg Ct ref. control	△Ct ref. gene	ratio		Multiple comperisons
	Group 1	DMSO	22.558	22.547	22.786	0.239	17.525	17.421	17.827	0.406	0.906		Group 1	DMSO	23.087	23.082	22.982	-0.1	18.186	18.154	18.11	-0.045	0.961		Group 1	DMSO	22.481	22.414	22.763	0.349	17.397	17.391	17.678	0.287	1.056		Dunnett's T3 multiple comparisons test	Mean Diff.	95.00% CI of diff.	Below threshold?	Summary	Adjusted P Value
			22.477				17.432								23.102				18.154								22.424				17.456						aqp1a.1 vs. aqp1a.1-Ki8751	0.5237	0.4401 to 0.6072	Yes	****	<0.0001
			22.605				17.304								23.058				18.124								22.336				17.32						aqp8a.1 vs. aqp8a.1-Ki8751	0.173	0.06956 to 0.2764	Yes	**	0.0011
	Group 2	DMSO	22.824	22.861		-0.076	17.983	17.995		-0.169	1.059		Group 2	DMSO	22.9	22.905		0.077	18.195	18.152		-0.043	1.084		Group 2	DMSO	22.636	22.784		-0.021	17.775	17.759		-0.081	1.039		dll4 vs. dll4-Ki8751	0.2224	0.1428 to 0.3020	Yes	****	<0.0001
			22.903				17.946								22.931				18.128								22.845				17.758						tm4sf18 vs. tm4sf18-Ki8751	0.745	0.4973 to 0.9927	Yes	****	<0.0001
			22.857				18.057								22.884				18.134								22.87				17.743
	Group 3	DMSO	22.879	22.949		-0.164	18.052	18.064		-0.238	1.042		Group 3	DMSO	23.034	22.96		0.023	18.001	18.022		0.087	0.96		Group 3	DMSO	23.105	23.091		-0.328	17.936	17.883		-0.206	0.911		Test details	Mean 1	Mean 2	Mean Diff.	SE of diff.	n1	n2	t	DF
			22.952				18.074								22.861				17.975								22.986				17.888						aqp1a.1 vs. aqp1a.1-Ki8751	1.002	0.4787	0.5237	0.02979	9	9	17.58	14.63
			23.017				18.067								22.984				18.09								23.182				17.826						aqp8a.1 vs. aqp8a.1-Ki8751	1.002	0.829	0.173	0.03688	9	9	4.691	15.07
	Group 1	Ki8751	23.097	23.034		-0.248	17.656	17.623		0.204	0.739		Group 1	Ki8751	22.856	22.836		0.147	17.638	17.637		0.473	0.815		Group 1	Ki8751	23.205	23.227		-0.464	17.759	17.695		-0.017	0.735		dll4 vs. dll4-Ki8751	1.001	0.7785	0.2224	0.02785	8	8	7.983	12.88
			22.99				17.63								22.807				17.582								23.21				17.62						tm4sf18 vs. tm4sf18-Ki8751	1.052	0.3069	0.745	0.08755	8	8	8.509	13.53
			23.013				17.584								22.845				17.69								23.264				17.706
	Group 2	Ki8751	23.033	23.122		-0.336	17.928	17.82		0.007	0.79		Group 2	Ki8751	22.962	22.972		0.01	17.735	17.713		0.396	0.779		Group 2	Ki8751	23.353	23.472		-0.709	18.171	18.161		-0.483	0.84
			23.157				17.791								22.965				17.631								23.551				18.219
			23.177				17.74								22.99				17.774								23.51				18.094
	Group 3	Ki8751	23.293	23.277		-0.491	18.156	18.093		-0.266	0.848		Group 3	Ki8751	23.052	23.01		-0.028	18.199	18.161		-0.051	1.014		Group 3	Ki8751	23.202	23.215		-0.453	18.063	18.004		-0.326	0.904
			23.317				18.115								22.97				18.213								23.186				17.965
			23.22				18.007								23.01				18.07								23.258				17.984
	tm4sf18	Treatment	Ct target gene	Avg Ct target gene	Avg Ct target control	△Ct target gene	Ct ref. gene	Avg Ct ref. gene	Avg Ct ref. control	△Ct ref. gene	ratio		tm4sf18	Treatment	Ct target gene	Avg Ct target gene	Avg Ct target control	△Ct target gene	Ct ref. gene	Avg Ct ref. gene	Avg Ct ref. control	△Ct ref. gene	ratio		tm4sf18	Treatment	Ct target gene	Avg Ct target gene	Avg Ct target control	△Ct target gene	Ct ref. gene	Avg Ct ref. gene	Avg Ct ref. control	△Ct ref. gene	ratio
	Group 2	DMSO	26.031	26.027	25.889	-0.138	17.983	17.995	18.03	0.035	0.88		Group 1	DMSO	25.537	25.612	25.75	0.138	18.186	18.154	18.11	-0.045	1.144		Group 1	DMSO	25.895	25.826	25.824	-0.002	17.397	17.391	17.637	0.246	0.852
			26.143				17.946								25.686				18.154								25.846				17.456
			25.907				18.057								25.613				18.124								25.735				17.32
	Group 3	DMSO	25.613	25.751		0.138	18.052	18.064		-0.035	1.137		Group 2	DMSO	26.217	26.111		-0.361	18.195	18.152		-0.043	0.78		Group 2	DMSO	25.432	25.557		0.267	17.775	17.759		-0.121	1.327
			25.817				18.074								26.143				18.128								25.547				17.758
			25.824				18.067								25.973				18.134								25.692				17.743
	Group 2	Ki8751	27.495	27.439		-1.55	17.928	17.82		0.21	0.266		Group 3	DMSO	25.565	25.527		0.223	18.001	18.022		0.087	1.121		Group 3	DMSO	25.812	25.822		0.002	17.936	17.883		-0.246	1.174
			27.206				17.791								25.479				17.975								25.768				17.888
			27.617				17.74								25.537				18.09								25.887				17.826
	Group 3	Ki8751	27.436	27.447		-1.557	18.156	18.093		-0.063	0.316		Group 1	Ki8751	27.873	27.708		-1.958	17.638	17.637		0.473	0.165		Group 1	Ki8751	27.373	27.053		-1.229	17.759	17.695		-0.057	0.405
			27.576				18.115								27.796				17.582								26.845				17.62
			27.328				18.007								27.456				17.69								26.942				17.706
													Group 2	Ki8751	27.81	27.76		-2.01	17.735	17.713		0.396	0.166		Group 2	Ki8751	27.49	27.277		-1.453	18.171	18.161		-0.524	0.461
															27.599				17.631								27.092				18.219
															27.872				17.774								27.25				18.094
													Group 3	Ki8751	28.612	28.6		-2.85	18.199	18.161		-0.051	0.117		Group 3	Ki8751	26.952	26.894		-1.07	18.063	18.004		-0.367	0.559
															28.457				18.213								26.977				17.965
															28.732				18.07								26.754				17.984
	dll4	Treatment	Ct target gene	Avg Ct target gene	Avg Ct target control	△Ct target gene	Ct ref. gene	Avg Ct ref. gene	Avg Ct ref. control	△Ct ref. gene	ratio		dll4	Treatment	Ct target gene	Avg Ct target gene	Avg Ct target control	△Ct target gene	Ct ref. gene	Avg Ct ref. gene	Avg Ct ref. control	△Ct ref. gene	ratio		dll4	Treatment	Ct target gene	Avg Ct target gene	Avg Ct target control	△Ct target gene	Ct ref. gene	Avg Ct ref. gene	Avg Ct ref. control	△Ct ref. gene	ratio
	Group 2	DMSO	25.989	25.928	26.012	0.084	17.983	17.995	18.03	0.035	1.035		Group 1	DMSO	25.947	25.87	25.785	-0.085	18.186	18.154	18.11	-0.045	0.972		Group 1	DMSO	25.194	25.187	25.574	0.388	17.397	17.391	17.678	0.287	1.078
			25.892				17.946								25.794				18.154								25.233				17.456
			25.903				18.057												18.124								25.133				17.32
	Group 3	DMSO	25.999	26.097		-0.084	18.052	18.064		-0.035	0.966		Group 2	DMSO	25.78	25.786		-0.001	18.195	18.152		-0.043	1.027		Group 2	DMSO	25.692	25.765		-0.19	17.775	17.759		-0.081	0.927
			26.081				18.074								25.879				18.128								25.856				17.758
			26.21				18.067								25.699				18.134								25.746				17.743
	Group 2	Ki8751	26.571	26.449		-0.436	17.928	17.82		0.21	0.651		Group 3	DMSO	25.843	25.699		0.086	18.001	18.022		0.087	1.002		Group 3	DMSO	25.814	25.772		-0.197	17.936	17.883		-0.206	1
			26.431				17.791								25.63				17.975								25.808				17.888
			26.343				17.74								25.623				18.09								25.693				17.826
	Group 3	Ki8751	26.324	26.33		-0.317	18.156	18.093		-0.063	0.841		Group 1	Ki8751	25.685	25.78		0.005	17.638	17.637		0.473	0.739		Group 1	Ki8751	25.938	25.934		-0.36	17.759	17.695		-0.017	0.794
			26.342				18.115								25.766				17.582								25.912				17.62
			26.324				18.007								25.887				17.69								25.953				17.706
													Group 2	Ki8751	25.775	25.753		0.032	17.735	17.713		0.396	0.791		Group 2	Ki8751	26.498	26.453		-0.879	18.171	18.161		-0.483	0.757
															25.749				17.631								26.438				18.219
															25.735				17.774								26.424				18.094
													Group 3	Ki8751	26.082	26.081		-0.296	18.199	18.161		-0.051	0.847		Group 3	Ki8751	26.191	26.204		-0.63	18.063	18.004		-0.326	0.808
															26.164				18.213								26.357				17.965
															25.996				18.07								26.064				17.984

## Sheet: Figure 1I
	Figure 1 - Source Data 1
	Figure 1I: qPCR analysis of AQP1 mRNA expression in HAECs treated with 1 or 10 nM Ki8751.
	Exp. 1	Treatment	Ct target gene	Avg Ct target gene	Avg Ct target control	△Ct target gene	Ct ref. gene	Avg Ct ref. gene	Avg Ct ref. control	△Ct ref. gene	ratio		ANOVA result
	Group 1	DMSO	29.698	29.708	29.688	-0.02	16.565	16.495	16.569	0.074	0.948		Brown-Forsythe ANOVA test
			29.718				16.457						F* (DFn, DFd)	11.29 (2.000, 4.294)
	Group 2	DMSO	29.757	29.669		0.02	16.681	16.643		-0.074	1.055		P value	0.0195
			29.581				16.636						P value summary	*
	Group 1	1 nM	30.493	30.586		-0.898	16.738	16.718		-0.149	0.639		Significant diff. among means (P < 0.05)?	Yes
			31.153				16.74
			30.112				16.675						Welch's ANOVA test
	Group 2	1 nM	30.107	30.222		-0.534	16.543	16.526		0.043	0.711		W (DFn, DFd)	26.66 (2.000, 5.311)
			30.073				16.506						P value	0.0017
			30.486				16.528						P value summary	**
	Group 1	10 nM	30.68	31.197		-1.509	16.688	16.657		-0.088	0.429		Significant diff. among means (P < 0.05)?	Yes
			30.871				16.601
			32.041				16.682						Data summary
	Group 2	10 nM	30.45	30.294		-0.605	16.707	16.642		-0.073	0.728		Number of treatments (columns)	3
			30.209				16.59						Number of values (total)	12
			30.222				16.628
	Exp. 2	Treatment	Ct target gene	Avg Ct target gene	Avg Ct target control	△Ct target gene	Ct ref. gene	Avg Ct ref. gene	Avg Ct ref. control	△Ct ref. gene	ratio		Multiple comparisons
	Group 1	DMSO	30.48	30.501	30.523	0.022	18.076	18.025	18.076	0.05	0.984		Dunnett's T3 multiple comparisons test	Mean Diff.	95.00% CI of diff.	Below threshold?	Summary	Adjusted P Value
			30.523				17.974						DMSO vs. Ki8751 (1 nM)	0.2835	0.1622 to 0.4048	Yes	**	0.0015
	Group 2	DMSO	30.507	30.545		-0.022	18.16	18.126		-0.05	1.016		DMSO vs. Ki8751 (10 nM)	0.3408	-0.009541 to 0.6910	No	ns	0.0537
			30.615				18.124
			30.512				18.095						Test details	Mean 1	Mean 2	Mean Diff.	SE of diff.	n1	n2	t	DF
	Group 1	1 nM	30.787	30.551		-0.028	17.649	17.54		0.536	0.724		DMSO vs. Ki8751 (1 nM)	1.001	0.7173	0.2835	0.03926	4	4	7.222	5.426
			30.56				17.519						DMSO vs. Ki8751 (10 nM)	1.001	0.66	0.3408	0.08845	4	4	3.852	3.425
			30.306				17.452
	Group 2	1 nM	30.728	31.011		-0.488	18.109	18.182		-0.106	0.795
			30.934				18.206
			31.371				18.232
	Group 1	10 nM	30.887	30.922		-0.399	17.692	17.737		0.338	0.651
			30.86				17.783
			31.018
	Group 2	10 nM	31.344	31.03		-0.507	18.298	18.28		-0.205	0.832
			31.529				18.251
			30.217				18.292
