# Supplementary material for: Combined forces of hydrostatic pressure and actin polymerization drive endothelial tip cell migration and sprouting angiogenesis
Source: eLife. 2025 Feb 20;13:RP98612. doi: 10.7554/eLife.98612 (PMC11841990; doi:10.7554/eLife.98612)
Supplement: Figure 3—figure supplement 3—source data 1. [file elife-98612-fig3-figsupp3-data1.xlsx]

## Sheet: Figure 3-figure supplement 3A-D
	Figure 3 - figure supplement 3 - Source data 1
	Figure 3 - figure supplement 3A-D: number of truncated ISVs per embryo in wild type and aquaporin mutants.
		No. of embryos
	No. of truncated ISVs per embryo	wild type	aqp1a.1-/-	aqp8a.1-/-	aqp1a.1-/-aqp8a.1-/-
	0	38	5	13	16
	1	5	2	8	9
	2	4	3	6	24
	3	0	1	2	15
	4	0	0	4	19
	5	0	4	0	10
	6	0	2	3	11
	7	0	0	1	9
	8	0	2	1	9
	9	0	1	0	10
	10	0	2	0	13
	11	0	2	0	7
	12	0	1	0	12
	13	0	1	0	8
	14	0	2	0	9
	15	0	1	0	4
	16	0	1	0	4
	17	0	0	0	1
	18	0	0	0	4
	19	0	0	0	1
	20	0	0	0	2
	21	0	0	0	6
	22	0	0	0	1
	n=	47	30	38	204

## Sheet: Figure 3-figure supplement 3E
	Figure 3 - figure supplement 3 - Source data 1
	Figure 3 - figure supplement 3E: frequency (%) of truncated ISVs found at each segmental position.
		wild type	aqp1a.1-/-	aqp8a.1-/-	aqp1a.1-/-aqp8a.1-/-
	ISV5	2.1	23.3	0	23.9
	ISV6	6.4	38.3	6.8	25.5
	ISV7	0	35	9.1	31.3
	ISV8	6.4	28.3	4.5	25.8
	ISV9	0	30	6.8	29.7
	ISV10	0	26.7	4.5	22.5
	ISV11	0	21.7	9.1	26.1
	ISV12	0	30	2.3	22.5
	ISV13	2.1	23.3	4.5	20.6
	ISV14	4.3	15	0	19.5
	ISV15	2.1	13.3	4.5	19.2
	ISV16	0	6.7	0	15.7
	ISV17	0	11.7	0	12.9
	ISV18	0	1.7	4.5	13.2
	ISV19	0	3.3	2.3	11
	ISV20	0	3.3	4.5	12.4
	ISV21	0	3.3	2.3	8
	ISV22	0	3.3	0	4.9
	ISV23	2.1	3.3	2.3	6.6
	ISV24	0	0	0	3.6
	ISV25	0	0	0	3.3
	ISV26	0	0	0	3.8
	ISV27	0	1.7	0	2.7
	Number of analyzed embryos:
	wild type (n=47)
	aqp1a.1-/- (n=30)
	aqp8a.1-/- (n=38)
	aqp1a.1-/-;aqp8a.1-/- (n=204)

## Sheet: Figure 3-figure supplement 3I
	Figure 3 - figure supplement 3 - Source Data 1
	Figure 3 - figure supplement 3I: Length of ISVs (µm) at different positions along the trunk in aqp1a.1 heterozygote and homozygote embryos at 28 hpf.
		ISV4		ISV5		ISV6		ISV7		ISV8		ISV9		ISV10		ISV11		ISV12		ISV13		ISV14		ISV15		ISV16		ISV17		ISV18		ISV19		ISV20		ISV21		ISV22		ISV23		ISV24		ISV25		ISV26		ISV27
		aqp1a.1+/-	aqp1a.1-/-	aqp1a.1+/-	aqp1a.1-/-	aqp1a.1+/-	aqp1a.1-/-	aqp1a.1+/-	aqp1a.1-/-	aqp1a.1+/-	aqp1a.1-/-	aqp1a.1+/-	aqp1a.1-/-	aqp1a.1+/-	aqp1a.1-/-	aqp1a.1+/-	aqp1a.1-/-	aqp1a.1+/-	aqp1a.1-/-	aqp1a.1+/-	aqp1a.1-/-	aqp1a.1+/-	aqp1a.1-/-	aqp1a.1+/-	aqp1a.1-/-	aqp1a.1+/-	aqp1a.1-/-	aqp1a.1+/-	aqp1a.1-/-	aqp1a.1+/-	aqp1a.1-/-	aqp1a.1+/-	aqp1a.1-/-	aqp1a.1+/-	aqp1a.1-/-	aqp1a.1+/-	aqp1a.1-/-	aqp1a.1+/-	aqp1a.1-/-	aqp1a.1+/-	aqp1a.1-/-	aqp1a.1+/-	aqp1a.1-/-	aqp1a.1+/-	aqp1a.1-/-	aqp1a.1+/-	aqp1a.1-/-	aqp1a.1+/-	aqp1a.1-/-
	embryo 1	104.8	90.6	113.4	67.1	60.1	53.8	101.5	44.7	109.2	26.7	110.3	31.4	115.3	42	69.8	0	108.9	21.9	98.6	32.4	108	18.3	104.1	37.8	97.2	46.9	64.7	0	76.3	15.5	74.8	7.9	43.4	13	40.1	24	35.7	6.2	0	0	8.8	0	7.4	0	0	0	0	0
		103.9	97.9	114.6	62.9	77.2	37.4	103.2	45.8	101.4	14.1	102.9	0	81	28.6	94.9	17.8	97.9	29.7	98.4	0	98.8	15.2	108.2	34.3	101.6	48.9	80.4	0	50.4	33.3	86	16.4	39.1	0	44.3	0	31.4	0	0	0	0	0	0	0	0	0	0	0
	embryo 2	112.3	112	110.1	107.3	96.2	76.6	105.3	106.6	102.2	108.8	63.8	67.8	105.4	69.7	105.9	60.9	98.6	59	46	98.1	95	62.5	53.4	85.8	91.1	81.5	68	71	89	56.4	65.9	87.8	57.8	47.8	26.4	47.7	35.7	38.9	10.2	0	0	17.8	0	0	0	0	0	0
		103.4	93.2	72.2	108.3	112	116.1	108.4	115.3	88.2	114.2	64.2	61.3	101.8	70.2	63.6	68	49.9	100.7	55.9	90	94.8	53.7	88.6	80.5	61.9	92.7	80.9	71.2	76.2	88.4	60.1	68.9	47.4	55.8	45.1	57.5	43.4	28.4	15.8	0	0	0	0	0	0	0	0	0
	embryo 3	66	105.4	102.5	75.2	105.8	67.5	111	66.6	110.8	52.9	111.2	45.9	101.4	16	106.3	43.2	60.1	0	105.5	0	103.4	57.7	99	0	98.6	28.8	52.7	35.6	95.1	52.9	79	0	51.8	51.7	49.1	0	36.9	0	28	0	0	0	0	0	0	0	0	0
		110.2	111.7	100.2	111.9	108.9	56	101.1	53	104.1	38.4	58.8	0	98.4	45.9	104.1	27.6	99.7	0	95.1	0	71.3	0	44.3	0	97.3	0	92.2	0	41.5	0	80	0	42	0	19.6	0	20.4	0	0	0	0	0	0	0	0	0	0	0
	embryo 4	100.3	103.4	100.3	113.3	95	75.6	72.6	59.8	98.8	31.6	108.3	64.7	48.3	59.4	92.6	56.6	89.1	71	90.2	59.5	90.4	19.5	62.4	53.9	83.9	50	56.8	61	54.5	47.2	45.3	80.4	42.6	36.2	15.2	20.6	0	32.2	0	21.2	0	0	0	0	0	0	0	0
		103.9	104.6	103.3	44.8	107.5	57.4	105.6	0	105.8	61.4	97.2	55.2	92.2	59.7	100.7	52.2	86.2	101.4	96.9	50.6	89	51.9	85.4	29.9	91.7	49.1	66.5	43.6	69.1	49.9	60.2	29.8	26.1	0	24.8	0	37.5	26.3	0	0	0	0	0	0	0	0	0	0
	embryo 5	101.1	112.6	100	108.3	106	108.4	102.1	64.9	105.9	107.4	107.7	107.3	68.2	103.6	65	92.3	65.4	58.1	99.2	107.6	68.5	51.7	51.2	67.9	92	91.7	51.3	46	41.2	43.8	48.9	41.2	55.7	34.5	23.3	47.7	41.5	24	21.3	8	0	11.4	19.8	0	0	0	0	0
		111.2	110.2	106.8	114.3	110.6	112	102.9	113.6	96.2	112.9	31.6	92.7	107.2	108.9	106	101.2	96.7	97.8	101.9	93	107.9	101.3	82.8	99.5	95.4	65	58.9	57.7	65.8	43.7	48.8	35.4	46.8	26.8	42.6	21.4	32.8	20.1	19.2	14.4	15.7	0	0	0	0	0	0	0
	embryo 6	102.4	109.9	100.1	67.6	100	56.3	105.8	0	111.2	32.1	101.7	20.5	100.4	25.7	101.6	37.9	84.3	30.9	98.7	57.3	94.1	13.4	92	33.2	96.8	48	85.2	32.7	86.3	36.1	78.9	24.9	79.3	37.8	63.9	12.2	72	10.3	35.4	0	20.4	0	24.7	0	0	0	0	0
		102.8	105.1	103.1	107.3	110.3	107.8	100.3	28	106.2	29.6	106.1	49.2	103.7	46.4	98.1	33	100.7	0	100.9	20.2	92.7	0	85.3	0	95.9	44.2	86.7	15	91.3	24.5	72.6	12	45.4	13.9	74	0	58.8	0	44.5	0	15.7	0	0	0	0	0	0	0
	embryo 7	104.5	107.3	106.3	58.8	88.5	49.9	95.8	47.5	107.9	65.7	104.4	74.8	99.1	67.9	74.6	63.4	98.1	71.2	83.2	97.7	100	84.7	100.1	68.8	53.4	60.7	99.9	81.4	59.1	44.8	42.4	37.9	78.5	53.7	26.1	30.6	0	32.5	28.8	0	8.8	0	0	0	0	0	0	0
		105.8	116.6	108.4	57.2	109.3	41.4	103.7	59.4	98.5	58.8	107.5	52.5	90.4	52.6	54.5	57.6	98	74	99.3	45.7	95.8	50.4	90.8	45.7	92.8	40.3	72.2	47.6	90.8	48.6	45.9	41.7	39.7	23.7	35.6	0	24.5	18.1	23.4	0	8.7	0	0	0	0	0	0	0
	embryo 8	106.1	n.a.	99.5	78.8	110.6	110.4	109.2	69.5	115.1	61.7	101.7	51.1	104.9	48.1	107.6	25.5	107.4	71.7	102.1	61.5	99	61.6	100.6	66.4	89.2	29.2	91.7	50.2	91.1	16.3	49.7	0	94	41.3	45.7	42.7	45.9	22.1	34.5	0	11.2	0	0	0	0	0	0	0
		100.3	n.a.	96.3	105.6	103.1	48.5	99.4	52.2	109.4	41.4	97	85.1	99.5	22.1	104.2	110.4	99.6	24.8	101	54.4	101	34.8	90.5	0	79.8	0	93.6	32	83.9	0	77.6	41	65.7	27.3	30.7	23.3	29.6	21.3	0	0	0	0	0	0	0	0	0	0
	embryo 9	102.6	n.a.	103.8	113.7	108.6	123.7	113.2	77.7	114.7	110.8	103.4	63.3	101.9	111.2	101.4	113.8	101.8	117.6	98.2	108.3	107.2	61	100.7	104.3	91.7	48.1	73.6	99.7	86.6	89.6	61.2	67.3	75.1	44.2	43.1	53.1	41.6	38.5	15.2	39.7	24.8	14	6.2	0	0	0	0	0
		73.4	n.a.	104.2	107.7	101.6	66	102.1	55.2	103.7	82.2	100.6	112.5	101.5	0	100	98.8	102.8	51.2	94.2	45	92.4	96	97.8	62.2	90.1	99.2	90.1	90.7	86.5	85.4	61.4	38.7	56	34.7	70.9	38	40.1	32.8	29.1	29.6	15.8	0	9.7	0	0	0	0	0
	embryo 10	113.4		102.6		113.6		109		114.2		79.3		97		71		108.7		107.8		89.3		79		95.9		62.9		57		73.3		44.3		46.6		16.9		16.3		0		0		0		0
		112.1		111.1		98.7		61.4		113.2		109.4		108		92.6		105		101		101.3		76.4		95.1		66		93.8		89.3		65.6		14.6		31.9		21.9		16.8		0		0		0
	embryo 11	105		69.4		106.3		101.5		97.6		110.8		100.1		103.8		83.5		99.3		32.1		39.9		56.6		94.8		77		79		55.7		49		48.6		19.5		0		0		0		0
		111.9		116.7		76.4		111.8		105.9		103.3		105.5		98.9		65.2		96.7		52		91.7		62.6		59.9		85.7		55.2		34		61.4		20.6		18		0		0		0		0
		Note
		Every value corresponds to a single vessel. Vessels on both side of the embryo were measured.
		"0" no vessel in this position.
[truncated: 2 more columns]

## Sheet: Figure 3-figure supplement 3J
	Figure 3 - figure supplement 3 - Source Data 1
	Figure 3 - figure supplement 3J: Length of ISVs (µm) at different positions along the trunk in aqp8a.1 heterozygote and homozygote embryos at 28 hpf.
		ISV4		ISV5		ISV6		ISV7		ISV8		ISV9		ISV10		ISV11		ISV12		ISV13		ISV14		ISV15		ISV16		ISV17		ISV18		ISV19		ISV20		ISV21		ISV22		ISV23		ISV24		ISV25		ISV26		ISV27
		aqp8a.1+/-	aqp8a.1-/-	aqp8a.1+/-	aqp8a.1-/-	aqp8a.1+/-	aqp8a.1-/-	aqp8a.1+/-	aqp8a.1-/-	aqp8a.1+/-	aqp8a.1-/-	aqp8a.1+/-	aqp8a.1-/-	aqp8a.1+/-	aqp8a.1-/-	aqp8a.1+/-	aqp8a.1-/-	aqp8a.1+/-	aqp8a.1-/-	aqp8a.1+/-	aqp8a.1-/-	aqp8a.1+/-	aqp8a.1-/-	aqp8a.1+/-	aqp8a.1-/-	aqp8a.1+/-	aqp8a.1-/-	aqp8a.1+/-	aqp8a.1-/-	aqp8a.1+/-	aqp8a.1-/-	aqp8a.1+/-	aqp8a.1-/-	aqp8a.1+/-	aqp8a.1-/-	aqp8a.1+/-	aqp8a.1-/-	aqp8a.1+/-	aqp8a.1-/-	aqp8a.1+/-	aqp8a.1-/-	aqp8a.1+/-	aqp8a.1-/-	aqp8a.1+/-	aqp8a.1-/-	aqp8a.1+/-	aqp8a.1-/-	aqp8a.1+/-	aqp8a.1-/-
	embryo 1	100.6	104.5	112	100.2	111.7	108.3	110.6	66.6	112.2	68.7	108.9	110.1	105.9	43.2	102.8	108.4	105.8	104.9	99.7	99.1	102.4	99.3	95.4	104.7	61.4	85.1	90	62.6	83.6	96.4	56.2	53.6	52.5	48.7	52.2	58.6	14.6	26.3	30.6	24.3	0	21.8	0	0	0	0	0	0
		102.6	103.9	109.9	105.9	107.2	108.4	105	63.8	102.9	76.8	108.4	111	103.8	62.4	104.2	58.2	102.5	109.2	99.1	39.8	92.8	53.2	90.2	98.8	94.5	41.2	59.5	47	43.4	78.2	55.9	53.9	14	34.6	0	34.4	39.7	39.2	0	33.1	0	13.8	0	0	0	0	0	0
	embryo 2	105.6	100.1	108.6	107.2	110.8	100.4	106.4	110.7	108.2	111.5	112	62.4	111.4	109.8	107.7	45.9	103.7	103.3	107.1	96.4	110.1	63.6	109.3	95.1	96.2	49.1	99.4	82.3	97	55	81.6	96	76.3	45.5	63.6	40.1	38.5	44.3	0	0	38	20.7	0	0	0	0	0	0
		99.4	102	109.5	108.1	107.8	66.9	112.6	61.9	113.9	102.5	110.8	59.8	102.9	43.8	109.5	108.4	107.2	40.7	104.1	105.2	102.1	51.6	97.4	96.9	92.5	97.5	93.2	90.2	41.5	66.9	82.7	51.3	55.1	86.1	49.1	38.9	52.4	31.7	56.3	43.4	17.6	0	0	17.2	0	0	0	0
	embryo 3	98.7	100.5	104.6	107.1	110.5	69.8	112.9	107.8	115.4	107.4	113.6	106.9	112.3	112.3	113.9	105.8	111.1	106.6	107	84.3	102.4	94	103.3	105.3	100.7	104.8	97.7	0	65.9	51	89.8	71.2	86.7	29.6	52.6	31.6	60	22.7	13.9	10.9	17.1	0	0	9.2	0	0	0	0
		101.2	105.8	96.9	108.7	113.8	107.9	110.9	113	114.5	106.8	115.3	107.2	112.1	59.2	105.9	70.4	104	61	106.3	47.5	99.4	49.2	96.4	100	99.9	49.3	61.7	38.1	97.2	82.3	62.2	60	55.6	36.3	80.7	13.9	36.5	11	27.1	25.9	16.2	0	0	0	0	0	0	0
	embryo 4	99.8	96.9	112.3	113.3	111.3	92.7	112.7	99.7	107.6	54.1	121.9	93.7	118	99.7	113.7	58	107.4	101.8	73.4	52.7	110.8	65.7	101	66.8	100.2	60.2	95.6	49.6	76.9	41.5	90.5	42.7	90.6	36	87.7	10.8	78.9	16	46.4	0	35.1	0	28.1	0	0	0	0	0
		100.4	100.3	106.4	109.8	113.3	102.1	113.5	51.9	115.5	79.1	108.1	86.7	106.3	100.5	106.5	110.6	110	59.6	114.4	97	111.7	55.6	92.8	68.9	96	54.3	91.1	39.5	90.6	40.7	53.7	34.8	89	13.2	77	15.3	50.3	19.3	40.2	16.5	31.4	0	0	0	0	0	0	0
	embryo 5	103.5	100.7	107.3	104.4	109.1	105.2	117	103.6	115.6	81.8	122	115.5	112.6	60	109.1	108.4	107.1	101.7	116.6	98.3	105.4	108.1	102.6	94.6	111.6	92.2	98.1	94	83.8	88.9	91.7	89.3	84.8	65.6	85.1	30.4	54.8	51.8	48.8	14.7	18.6	0	18.1	19.9	12.5	0	0	0
		100.3	105.1	105.5	109	111.5	111.1	112.2	111.9	107.8	110.4	113.1	110.9	114.4	111.6	115.4	111	102.5	106.9	105.5	96.5	101.7	107.6	102.7	104.2	101.2	108.7	96.6	90	100.7	92.6	92.5	23.6	90.5	70.1	72.6	48.5	55.2	28.3	74.5	47.1	35.2	19.6	0	21.1	26.2	19	0	0
	embryo 6	112.5	104.4	111.9	101.9	120.1	96.6	111.4	104.3	113	100.9	109.5	96.8	111.4	99.3	112.8	98	115.4	98.1	111	97	102.9	99.3	107.2	88.7	93.8	82.5	97.1	81.4	94.8	78.3	92.7	64.6	59	31.7	60.2	0	46.7	36.4	41.9	26.6	19.3	0	17.3	0	0	0	0	0
		105.6	111.7	104.5	113.8	117	48	113.1	112.4	107.2	106.5	111.2	104.9	105.3	101.5	108.4	103.8	97.3	103.8	102.9	103.7	103.8	98.8	101.1	100.7	97.7	91.1	96.7	97.9	74.5	88.1	79.8	55.7	53.6	65.6	54.8	27.4	53.5	19	28.1	37.7	14.8	0	0	13.9	0	0	0	0
	embryo 7	106.7	98.5	110.7	108.2	106.7	106.5	104.5	103.5	108.4	103.5	109.4	101.7	107.6	116.7	109.8	114.9	106.3	70.2	113.6	114.3	103.5	67.6	99.1	77.5	103.3	81.6	90.6	58.7	68	64.4	61.4	67.5	79	53.7	64.6	79.6	45	30.5	20.7	0	19.5	40.6	0	0	0	0	0	0
		102.1	111.9	97.1	115.8	104.2	121.1	105.6	109.6	111.2	111.2	109.5	106.4	107.9	56.7	99.5	104.7	100.9	57.6	105.4	71.2	102.6	97.8	98.6	95.7	67.9	89.8	94.2	91.6	85.1	47.6	89.8	45.7	48.4	59.5	75.4	50.6	43.3	37.8	0	18	0	0	0	13.7	0	0	0	0
	embryo 8	100.5	109.5	99.4	63.2	102.1	108	106.3	109.5	116.3	113.3	116.9	108.7	111.9	111.5	113.9	106.1	107.8	104.6	97.8	65.1	100.2	105.9	98.9	100	72	97.7	97.3	76.7	90.3	83	95.3	78.9	88.7	56.3	79.8	71.6	38.8	48.9	39.6	24	44.5	0	38.2	0	0	12	0	0
		104.6	112.1	106.2	108.3	108.8	110.8	111.5	107	115.4	112.3	112.7	79.7	111.6	106.8	107.9	103	102	98.9	103.9	107.8	105.4	105.5	102.6	100.1	98.5	98.7	102.9	94.3	90.6	66.7	91	55.2	77.5	54.4	77.8	36.8	74.4	42.4	43.7	19.6	48.5	11.5	0	0	0	0	0	0
	embryo 9	101.6	101.3	103	107.1	110.2	61.5	110.1	44	114.6	52.6	108.5	102.5	109.4	57.4	106.8	17.7	109.9	19.9	102.6	45.4	102.4	54.7	98.3	0	106.1	36	99.3	21.5	100	0	96.3	33.1	88.8	0	68.6	0	52.3	30.4	40.1	41.2	32.1	0	13	0	0	0	0	0
		100.8	102.4	105.1	109.6	107.8	102	114.3	56.3	105.4	59.8	103.3	51.5	105.7	0	107.1	20.7	108.4	43.4	106	15	100.8	0	99	47.7	89.5	17.8	93.6	40.6	91.6	22.6	79.8	28	59.3	14.9	57.1	0	42.7	20.4	0	0	30	0	0	0	0	0	0	0
	embryo 10	97.5	101.3	103.7	105.9	122.5	105.6	66.7	107	112	80.1	112.4	111.8	114	113.5	114.4	77.6	109.2	105.9	104.7	108.5	96.2	100.9	99.6	90.1	98.7	96.1	92.4	96.6	91.8	58.9	77.7	76.1	54.7	21.1	75.5	22.2	70.4	23.3	47.5	0	42.4	0	0	42.4	0	0	0	0
		108.6	103.9	109.3	101.9	112.7	108.6	109.8	105.1	115	103.7	112.7	108.6	112.6	48.5	119.1	101	112.8	97.4	110.1	99	109.9	104.4	98.8	58.8	98.6	95.3	99.3	95.9	90.8	94.4	90.5	92.6	84.3	72.2	48.4	70.7	78.8	41.9	37.7	18.2	41.4	12.8	33.6	0	21.9	15.7	0	0
		Note
		Every value corresponds to a single vessel. Vessels on both side of the embryo were measured.
		"0" no vessel in this position.
[truncated: 2 more columns]

## Sheet: Figure 3-figure supplement 3K
	Figure 3 - figure supplement 3 - Source Data 1
	Figure 3 - figure supplement 3K: Length of ISVs (µm) at different positions along the trunk in aqp1a.1;aqp8a.1 double heterozygote and homozygote embryos at 28 hpf.
		ISV4		ISV5		ISV6		ISV7		ISV8		ISV9		ISV10		ISV11		ISV12		ISV13		ISV14		ISV15		ISV16		ISV17		ISV18		ISV19		ISV20		ISV21		ISV22		ISV23		ISV24		ISV25		ISV26		ISV27
		aqp1a.1+/-aqp8a.1+/-	aqp1a.1-/-aqp8a.1-/-	aqp1a.1+/-aqp8a.1+/-	aqp1a.1-/-aqp8a.1-/-	aqp1a.1+/-aqp8a.1+/-	aqp1a.1-/-aqp8a.1-/-	aqp1a.1+/-aqp8a.1+/-	aqp1a.1-/-aqp8a.1-/-	aqp1a.1+/-aqp8a.1+/-	aqp1a.1-/-aqp8a.1-/-	aqp1a.1+/-aqp8a.1+/-	aqp1a.1-/-aqp8a.1-/-	aqp1a.1+/-aqp8a.1+/-	aqp1a.1-/-aqp8a.1-/-	aqp1a.1+/-aqp8a.1+/-	aqp1a.1-/-aqp8a.1-/-	aqp1a.1+/-aqp8a.1+/-	aqp1a.1-/-aqp8a.1-/-	aqp1a.1+/-aqp8a.1+/-	aqp1a.1-/-aqp8a.1-/-	aqp1a.1+/-aqp8a.1+/-	aqp1a.1-/-aqp8a.1-/-	aqp1a.1+/-aqp8a.1+/-	aqp1a.1-/-aqp8a.1-/-	aqp1a.1+/-aqp8a.1+/-	aqp1a.1-/-aqp8a.1-/-	aqp1a.1+/-aqp8a.1+/-	aqp1a.1-/-aqp8a.1-/-	aqp1a.1+/-aqp8a.1+/-	aqp1a.1-/-aqp8a.1-/-	aqp1a.1+/-aqp8a.1+/-	aqp1a.1-/-aqp8a.1-/-	aqp1a.1+/-aqp8a.1+/-	aqp1a.1-/-aqp8a.1-/-	aqp1a.1+/-aqp8a.1+/-	aqp1a.1-/-aqp8a.1-/-	aqp1a.1+/-aqp8a.1+/-	aqp1a.1-/-aqp8a.1-/-	aqp1a.1+/-aqp8a.1+/-	aqp1a.1-/-aqp8a.1-/-	aqp1a.1+/-aqp8a.1+/-	aqp1a.1-/-aqp8a.1-/-	aqp1a.1+/-aqp8a.1+/-	aqp1a.1-/-aqp8a.1-/-	aqp1a.1+/-aqp8a.1+/-	aqp1a.1-/-aqp8a.1-/-	aqp1a.1+/-aqp8a.1+/-	aqp1a.1-/-aqp8a.1-/-
	embryo 1	111.2	113.9	110.8	0	117.1	0	113.8	35.5	108.1	0	109.2	14.8	103.7	8.1	106.7	0	107.6	14.7	100.7	0	105	28.2	94.3	29.1	90.6	0	85	12.8	67.9	13.5	68	13.3	46.7	17.1	64.4	16.9	36.7	0	29.5	0	20.1	0	0	0	0	0	0	0
		117.4	0	116.8	55.7	115.8	27.5	124	0	119.6	16.3	111.3	0	111.6	9.7	111.3	26.5	106.9	19.5	101.3	41.9	107.7	17.5	98	0	99.3	0	93.9	0	63	42.9	57.4	24.1	24.6	9.7	65.5	31.3	40.6	0	31.6	0	0	0	0	0	0	0	0	0
	embryo 2	106.6	105	107.7	57.6	109.1	111.4	111.4	53.8	115.4	77.2	108.4	62.5	112.8	69.3	103.4	63.2	106.2	62.8	107.6	75.4	108	67.6	102	61.3	93.3	56.3	65.7	53.8	100.4	49.1	86.4	38.7	61.5	21.3	46.8	13	46.8	0	48.1	0	22.9	0	24.3	0	8.7	0	0	0
		104.5	50.7	106.9	93	106.3	54.6	103.7	99.5	106.7	0	104.7	57.5	99	71.8	103.9	89.7	102.6	26.2	53.1	46	98.5	41.5	100.2	47.4	102.7	58.1	91.5	62.2	97	20.4	90	26.7	83.2	13.6	60.3	15.4	81.5	10.3	35.6	0	44.7	0	22.9	0	12.3	0	0	0
	embryo 3	102.8	110.2	115.2	55	117.9	59.7	126.5	7.8	128.7	39.6	122.2	26.2	116.2	28.2	118.8	14.6	117.7	49.8	112.1	36.8	110.5	29.7	107.7	26.8	106.5	0	101.7	50.5	106	17.5	76.8	9.8	82	0	92.2	0	48.2	0	79.6	0	26.7	0	14	0	0	0	0	0
		104.2	105.4	121.4	50.8	121.4	96.4	123	33.1	121.8	16.6	122.4	0	116	49.3	113.4	0	111.5	27.8	116.5	0	110.8	44.7	99.4	39.4	101	52.2	103.2	0	94.4	18.4	86.7	0	38.3	0	87	0	82.8	0	53	0	18.5	0	29.5	0	8.5	0	0	0
	embryo 4	98.7	35.8	80.8	101.8	103	0	110.9	98.8	108.9	47.7	107	74.2	102.3	56.7	104.9	95.8	97.7	0	90.9	59.3	98.3	38.2	88.2	54.6	76.4	0	88.1	58.4	85	55.2	62.8	46.4	40.2	20.2	41.4	21.6	43	11.4	33.2	0	0	0	0	0	0	0	0	0
		110.4	112.1	107.8	107.3	108.5	105.8	110.9	49.5	110.4	103.5	117.4	44.2	110.5	46.9	112	0	111.9	0	104.7	55.4	101.3	83.1	55.4	0	95.3	74.7	96	48.2	96.3	15.7	82	0	53.1	0	53.3	23.6	44.1	0	40.8	0	0	0	0	0	0	0	0	0
	embryo 5	115.7	107.7	117.3	104.3	123.8	22.8	113.1	58.1	121.9	56.1	115.8	62.2	112.3	56.4	118.8	13.7	104.3	0	112.1	36.8	108.1	0	101.3	54.4	100.1	57.2	96.3	40.7	91.9	0	80.1	17.7	69.1	18.6	48.7	27.7	17.1	0	22.4	0	10.3	0	18.1	0	11.7	0	0	0
		113.7	107.2	113.7	42.5	120.3	55.4	120.8	109.1	116.9	52	116.5	58.2	113.4	47.9	111.7	17.5	110.7	18.6	108.7	20.7	108.8	55.5	102.4	55.5	97.9	11.6	96.2	48.3	51.4	0	82.5	32.6	81.1	0	21.9	0	45	0	35.4	0	17.4	0	7	0	0	0	0	0
	embryo 6	103.5	112.2	105.3	99.6	113.7	106.7	104.1	108	111.5	30.2	117.8	106.8	110.1	107.9	109.2	69.8	110.1	56.2	116	56.9	107.1	26.1	98.1	70.9	88	39.3	96.6	19.5	93.6	24.8	82.1	29.2	90.2	22.5	73.2	19.3	41.9	19.1	41.4	12	34.8	0	18.5	0	0	0	0	0
		103.6	113.3	108.8	109.4	112.7	103.4	114	0	114.1	48.8	114.2	50	107.3	104.2	106.4	0	109.4	78	107.1	26.2	101.7	54.4	93.6	0	99.7	71	93.5	35.2	86.2	56.7	69.5	27	78	30.2	58.3	18.7	61	35.7	43.8	13.7	39.5	0	29.2	0	0	0	0	0
	embryo 7	118.9	0	122.1	30.3	122.3	55.6	119.8	0	118.5	18.2	106	24.1	109.6	15.7	114.4	36	106.7	18.3	114.9	0	105.1	0	98.7	39.8	87.8	0	88.7	54.1	89.9	11.2	91.3	4.7	88.5	10.5	57.4	4.4	47.8	14.8	25.5	0	13.4	9.8	0	0	0	0	0	0
		110.3	110.7	115.1	44.5	116.4	17	111.1	44.5	113.3	0	54.2	88.3	111.2	63.1	105.4	39.4	73.7	0	102.7	0	105.8	16.3	92.4	0	67.8	56.1	94	90.7	82.1	37.3	77	16.5	50.2	10.9	48.6	24.3	43.1	8	27.7	0	0	0	0	0	0	0	0	0
	embryo 8	103.4	116.5	102.6	115.9	108.1	108.6	115.4	50.3	100.7	28.3	104.9	23.1	115	102.5	104.6	59	112	51.9	102.3	43.3	95.5	48.1	96.4	45.8	99.8	61.3	98.2	88.4	97.9	49.8	90.9	31.9	58.6	41.7	67.1	34.7	53.3	13.2	46.5	15.9	34.6	0	33.4	0	15.6	0	0	0
		106.3	112.3	107.8	59.3	103.4	108	113.1	50.1	113.7	87.3	102.2	35.1	108.6	48.2	106.5	40	56.9	40.3	64	32.7	95.7	37.2	98.3	33.5	88.8	41.4	84.6	47.6	98	40.4	69.7	40.8	71.1	39.5	51.9	18.5	78.8	20.1	24	24.9	45.1	13	21.2	0	0	0	0	0
	embryo 9	108.4	103.5	116.2	52	119.2	42.9	118.1	47.5	114.9	44.9	110.3	102.3	114.9	60.9	103.9	112.4	112.7	39.9	108.8	85.2	108.7	0	105.8	0	101.4	34.3	99.7	94.8	92.9	34.8	86.2	53	83.1	0	78	20.5	47.9	0	19.7	27.2	18.6	6.2	9.8	0	0	0	0	0
		113.2	112.6	117.1	107.2	119.1	54.5	116.5	60.2	119.2	53.9	119.9	41.7	111.6	43.6	112.3	111.8	105	61.6	109.1	62.4	113.3	59.7	105.4	46.2	99.3	43.3	100.8	97	91.7	42.3	56.9	42.7	90.2	41.1	42.5	47.1	49.3	31.5	39.3	0	13.7	10.6	18.4	10.2	0	0	0	0
	embryo 10	101	65	106.6	103.3	118.1	103.9	112.5	103.1	102.2	60.6	116.5	116.2	106	48.8	110.9	47.9	115.5	0	106.5	52.1	106.5	0	110.9	0	99.6	52.3	100.4	0	87.2	0	89.5	14.3	73.8	0	67.7	0	41.6	0	73.4	0	22.4	0	19.8	0	0	0	0	0
		115.7	34	110.7	47.2	113.5	0	112	0	115.5	96.3	111.3	40.3	105.7	33.1	108.7	30.7	104	0	100	43.2	108	31.7	103.9	33.1	101.1	42.1	99.6	17.2	95.6	17.4	83.6	17.7	53.5	0	54.8	0	29.9	0	0	0	40.8	0	0	0	0	0	0	0
	embryo 11	105.7	113.2	104.9	63.2	113.4	0	112.2	0	110.2	20.8	107.6	0	109.2	0	105.6	0	107.4	0	89.2	0	100.3	0	100.5	0	99.6	0	96.9	0	89.6	0	56.7	0	44.8	0	30.7	0	38.3	0	24.5	0	0	0	0	0	0	0	0	0
		110.2	107.8	110.8	0	113.3	0	116.7	33.7	113.5	0	113.8	0	113.5	0	109.6	0	112.2	0	110.9	0	106.3	0	102.2	0	102.2	0	94.6	0	79.3	0	92.4	0	56	0	19.2	0	49.1	0	27.5	0	16.1	0	0	0	0	0	0	0
	embryo 12	104.5	47.3	104.9	109.8	115.2	116.5	113.3	112.5	113.4	116.2	67.7	69.8	110	110.8	118	64.5	108.9	100.5	61.5	107.7	110.1	69	105.5	92	98.1	65.2	98.8	57.5	96.5	87.8	100.4	50.7	90.8	37.8	68.2	43.6	50.2	0	51.8	0	20.1	32.3	15.3	0	25.9	0	13.4	0
		104.7	107	102.1	68	108.8	108.2	114.3	107.7	111.8	102.1	115.6	106.8	50	47.3	106.3	89.7	105.4	44.1	107.1	79.3	105.4	54.8	103	88.4	100.6	92.2	92.4	46.7	95.5	50.6	94.8	41.4	63.7	15.2	72.1	23.4	42.7	0	57.8	0	36.4	0	30.4	0	18	0	0	0
	embryo 13	107.5	111.8	109.8	112.6	110.4	0	114.9	16.9	116.1	51.5	114.6	10.4	113.4	0	109.9	52.6	107.3	22.2	104.9	0	102.8	16.4	103.8	0	96.1	0	89.3	73.4	89.6	16.6	84.9	0	81.5	61.9	48.4	0	34.6	0	40.8	12.3	14.9	0	9.8	0	0	0	0	0
		112	106.9	114	54.8	120.8	0	114.6	0	117.5	56.5	113.4	53.2	109.7	0	109.8	61	111.5	0	108.9	15	106.2	0	99.9	29.6	105.6	0	103.7	88.5	70.7	0	88.8	33.8	45	0	48.8	16.4	40.4	18.1	41.5	14.3	12	0	11.1	0	0	0	0	0
	embryo 14	98.1	114	105.9	113.1	109.3	85.6	55.9	93.7	48.1	59.9	107	95.4	105.3	93.8	100.9	99.5	55.4	57.6	109.1	92.8	96.3	81.5	96.5	77.5	57.5	79.5	88	70.4	87.9	51.1	62.2	50.6	48.4	38	43.7	33.7	47.8	37.4	48.7	13.2	37.9	0	0	0	0	0	0	0
		111.6	104.4	77.9	116	101.6	108	114	107.6	50.8	113.7	67.9	108.5	50.3	116.7	102.1	103.1	110.7	102.8	108.2	62.3	56.1	94	103.6	96.2	86.7	91.4	101.7	85.6	106.1	62	93.4	47.8	79.4	53.1	52.6	18.3	44.5	9.5	46.3	15.6	25.7	0	0	0	14	0	0	0
	embryo 15	115.2	110.5	120.5	0	120.9	45.5	119.5	44.3	125	59	122.1	63.8	122.4	65	120.4	112.1	115.5	57.5	114.1	51.8	111.8	114.4	105	0	103.6	45.9	95.6	99.5	92.4	55.6	93.7	59.9	83.3	42.7	83.7	72	43.1	37.7	75	34	47.4	43	27.6	36.6	17.7	30.2	0	0
		115.2	110.6	116.3	112	126.4	36	121.9	61.9	119.4	74.1	117.7	58.6	114	62.4	127.6	63.7	110.7	51.3	113.1	62.7	109	31.7	104.5	101.7	103.9	52.7	95.2	94.9	70	95	69.5	50.9	96	35.2	68.7	0	90.1	42.9	38.9	31.2	19	41.8	27.1	0	0	15.5	0	0
	embryo 16	107.8	55.2	107	114.4	106.8	79.1	112.6	100.4	112.3	103.1	117.9	110.5	119.7	100.7	115.5	99	110.9	89.4	102.9	52.6	100.9	95.3	103.4	76	99.3	89.4	97.8	54.6	94.6	55.3	94.1	51.7	94.3	37	72.1	43.6	69.7	32	77.8	19.2	49.7	0	31.1	0	0	0	0	0
		105.5	110.5	109.1	111.7	107.1	112.6	114.6	0	113.3	101.8	111.9	109.9	108.3	102.9	108	100.9	109.8	45.9	108.9	77.7	101.1	98.4	96.8	36.6	101.9	92.5	98.4	42.7	102.9	79.6	99.3	29.5	91.3	28.6	49.7	18.9	83.9	0	82.6	20.7	38.3	12.6	35.1	0	0	0	0	0
	embryo 17	110.1	104.2	112.7	55.3	116.4	39.7	110.6	60	116.4	59.9	120.6	77	113.3	0	112.2	45.9	116.7	0	107.4	31.9	102.1	0	106.8	31.9	103.1	61.5	98.7	39.1	98.1	20.9	99.5	36.2	59.9	0	46.4	23.9	31.5	0	51.2	0	20.6	11.2	15.3	8.8	0	0	0	0
		121.9	26.9	116.4	28.8	114.5	54.4	118.4	70.9	117.2	54.6	116.6	65.2	118.1	33.7	115.1	52.9	75.6	37.3	104.2	0	107.1	111.3	111.3	0	105.4	46.8	100.6	49.4	90.6	19.2	96.4	67.4	75.9	37.3	51.3	25.9	49.4	42.2	26.7	0	37	18.6	12.2	18.5	11.8	0	0	0
	embryo 18	99.6	104.9	101.9	103.3	106.8	59	111.4	62.4	105.1	108.8	105.1	106.2	102.4	59.4	104.8	50.4	106.8	62.2	91.7	42.9	52.1	43.6	104.4	59.9	103.8	0	89.8	29.3	90.6	82.3	82.8	48.9	54.6	34.1	83.2	0	51.5	43.7	43.3	0	0	0	0	0	0	0	0	0
		102.4	n.a	93	107.1	100.3	47.8	102.8	105.7	102.7	29.7	103.1	57.5	98.6	67	101.4	0	99.8	26.5	102.3	38.6	62.7	42.9	99.4	24.7	101.9	84.6	57.3	58.3	95.4	48	85.1	28.2	67.3	23.6	53.5	17	34.7	0	48.5	0	26.5	0	19.8	0	31.9	0	0	0
	embryo 19	112.8	n.a	114.3	116.3	112.4	0	116.5	62.8	109.4	55	109.8	44.9	113.6	60.3	110.8	65.3	108.2	30.2	109.6	54.3	101	56.5	100.2	100.9	97.1	28.4	91.1	46.7	95.5	44.3	87.7	35.7	79	52	47.1	0	44.6	0	40.2	27.6	26.9	0	14.8	11.1	8	0	0	0
		114.3	n.a	117	114.8	115.1	28.5	119.5	23.6	117.2	41.4	113.2	56.9	109.8	62.6	109.8	0	107.1	54	103.2	55.6	109.2	57.1	102.7	56.7	98.9	0	98.6	44.1	99.8	20.2	85.2	58.6	86.7	21.2	46	0	64.8	0	79.6	13.7	29	0	19.2	11.1	7.5	0	0	0
	embryo 20	95.7		102.8		104.7		107.5		70.8		115.5		107.2		71.5		104.5		105.8		103.6		95		85.5		85.1		92.9		78.7		80.5		42.4		45.3		0		22.7		0		0		0
		106.2		103.8		110.1		113.9		114.2		115.6		74.3		110.7		100.5		110.3		103.3		112.9		103.1		66		82.9		50.6		86.3		79.1		36.6		78.4		28.5		38.6		15.7		0
	embryo 21	104.3		109.1		104		115.1		120.1		114.5		115.9		105.3		112.7		104.5		106.4		103.3		96.6		92.6		95.7		89.7		75.9		50.5		64		54.8		39.4		13.7		14.3		0
		111.4		116.7		112.8		115.3		121.5		116.9		112.7		119.8		112.7		113.7		111.7		113.6		103.1		101.7		97.9		97.3		82.8		55.3		44.2		42.6		42.5		19		11.8		0
		Note
		Every value corresponds to a single vessel. Vessels on both side of the embryo were measured.
		"0" no vessel in this position.
[truncated: 2 more columns]
