# Supplementary material for: Combined forces of hydrostatic pressure and actin polymerization drive endothelial tip cell migration and sprouting angiogenesis
Source: eLife. 2025 Feb 20;13:RP98612. doi: 10.7554/eLife.98612 (PMC11841990; doi:10.7554/eLife.98612)
Supplement: Figure 3—figure supplement 6—source data 1. [file elife-98612-fig3-figsupp6-data1.xlsx]

## Sheet: Figure3-figure supplement 6E
	Figure 3 - figure supplement 6 - Source data 1
	Figure 3-figure supplement 6E: DLV length (µm) at 4 dpf (pool data from 2 independent experiments)
	aqp1a.1+/+	aqp1a.1-/-
	100.9	75.9		Unpaired t test
	78.1	69.5		P value	0.0098
	88.8	80.5		P value summary	**
	77.1	67.1		Significantly different (P < 0.05)?	Yes
	78.6	66.2		One- or two-tailed P value?	Two-tailed
	63.3	70.8		t, df	t=2.764, df=29
	83.5	80.9
	87.3	72.7		How big is the difference?
	90	82.6		Mean of column A	84.6
	92.8	82.7		Mean of column B	74.44
	97.6	97.2		Difference between means (A - B) ± SEM	10.16 ± 3.677
	77.2	71.6		95% confidence interval	2.643 to 17.68
		77.6		R squared (eta squared)	0.2085
		82.6
		76.7		F test to compare variances
		73.9		F, DFn, Dfd	1.167, 11, 18
		71.1		P value	0.7449
		50.2		P value summary	ns
		64.5		Significantly different (P < 0.05)?	No
				Data analyzed
				Sample size, aqp1a.1+/+	12
				Sample size, aqp1a.1-/-	19
