# Supplementary material for: Combined forces of hydrostatic pressure and actin polymerization drive endothelial tip cell migration and sprouting angiogenesis
Source: eLife. 2025 Feb 20;13:RP98612. doi: 10.7554/eLife.98612 (PMC11841990; doi:10.7554/eLife.98612)
Supplement: Figure 3—figure supplement 7—source data 1. [file elife-98612-fig3-figsupp7-data1.xlsx]

## Sheet: Figure 3-figure supplement 7A
	Figure 3 - figure supplement 7 - Source Data 1
	Figure 3 - figure supplement 7A: Vessel diameter (µm) in wildtype and aquaporin mutant embryos at 2 dpf.
	arterial ISVs					venous ISVs						arterial ISVs				venous ISVs					ANOVA summary
	wild type	aqp1a.1-/-	aqp8a.1-/-	aqp1a.1-/-aqp8a.1-/-		wild type	aqp1a.1-/-	aqp8a.1-/-	aqp1a.1-/-aqp8a.1-/-			wild type	aqp1a.1-/-	aqp8a.1-/-	aqp1a.1-/-aqp8a.1-/-	wild type	aqp1a.1-/-	aqp8a.1-/-	aqp1a.1-/-aqp8a.1-/-		F	24.7
																					P value	<0.0001
	6.03	4.68	6.78	6.54		7.81	7.29	8.17	6.97		Number of values	178	63	39	36	148	42	59	25		P value summary	****
	6.63	6.99	10.1	5.48		8.27	6.3	9.74	4.33												Significant diff. among means (P < 0.05)?	Yes
	7.08	4.57	9.39	9.36		8.32	4.48	5.5	9.55		Minimum	4.43	3.37	5.12	4.72	4.93	4.44	5.5	4.33		R squared	0.2291
	7.19	5.3	9.4	6.06		10.96	5.53	7.31	7.99		25% Percentile	6.328	5.4	7.03	6.065	7.53	5.528	8.17	6.095
	7.78	6.56	5.12	5.76		8.7	6.22	11.23	6.16		Median	7.18	6.29	7.67	6.685	8.46	6.415	9.11	6.99		Brown-Forsythe test
	8.85	4.94	10.65	6.33		8.74	7.03	9.11	6.99		75% Percentile	8.423	7.4	9.4	8.25	9.258	8.075	10.17	8.11		F (DFn, DFd)	0.6618 (7, 582)
	4.87	7.6	7.65	6.01		6.83	8.29	12.78	7.6		Maximum	11.01	10.33	11.13	11.68	12.22	10.18	12.78	10.99		P value	0.7045
	5.5	7.36	8.32	6.56		9.51	4.76	9.19	6.74												P value summary	ns
	5.85	4.83	8.63	6.53		10.79	7.74	8.7	7.92		Mean	7.34	6.461	8.109	7.155	8.391	6.785	9.108	7.312		Are SDs significantly different (P < 0.05)?	No
	8.91	6.71	5.96	4.76		8.68	7.74	8.87	6.34		Std. Deviation	1.444	1.459	1.515	1.606	1.322	1.573	1.479	1.569
	6.55	5.86	6.78	4.72		7.8	8.64	9.55	7.73		Std. Error of Mean	0.1082	0.1839	0.2426	0.2676	0.1087	0.2427	0.1926	0.3137		Bartlett's test
	8.78	6.87	9.54	5.25		8.61	4.44	7.72	5.42												Bartlett's statistic (corrected)	4.195
	8.46	8.03	11.13	8.27		8.76	4.78	7.03	6.91		Lower 95% CI	7.127	6.093	7.618	6.611	8.176	6.295	8.722	6.665		P value	0.757
	4.99	5.46	6.72	8.19		5.92	4.6	8.77	4.98		Upper 95% CI	7.554	6.828	8.601	7.698	8.605	7.276	9.493	7.96		P value summary	ns
	6.92	8.55	8.98	6.64		10.39	5.88	6.39	6.99												Are SDs significantly different (P < 0.05)?	No
	5.74	6.29	8.77	10.53		7.41	5.88	10.15	10.99
	8.82	6.27	7.12	6.43		5.18	5.71	10.33	6.03												ANOVA table	SS	DF	MS	F (DFn, DFd)	P value
	8.55	6.06	6.84	7.14		8.78	5.08	8.16	10.112												Treatment (between columns)	363.3	7	51.9	F (7, 582) = 24.70	P<0.0001
	7.91	9.83	7.46	7.22		7.86	6.08	10.69	8.9												Residual (within columns)	1223	582	2.101
	8.94	8.03	7.03	8.77		7.22	5.7	9.22	5.85												Total	1586	589
	6.93	5.52	10.25	10.06		6.66	7.48	9.95	8.43
	6.2	6.07	7.5	6.6		6.49	9.09	8.9	6.02												Data summary
	7.05	7.4	9.67	6.08		9.71	5.12	8.95	8.16												Number of treatments (columns)	8
	5.79	7.63	9.77	5.97		8.84	5.52	10.12	7.63												Number of values (total)	590
	9.16	3.37	6.29	7.38		9.79	8.03	7.48	8.06
	7.68	4.42	7.14	7		8.99	7.83	8.52													Multiple comparisons
	6.61	7.14	6.14	5.02		8.54	4.72	7.67													Šídák's multiple comparisons test	Mean Diff.	95.00% CI of diff.	Below threshold?	Summary	Adjusted P Value
	7.13	5.71	8.71	6.43		8.87	9	8.89													wt-aISV vs. aqp1a.1_aISV	0.8793	0.2821 to 1.476	Yes	***	0.0004
	6.89	5.95	7.67	11.68		8.2	7.23	11.04													wt-aISV vs. aqp8a.1_aISV	-0.7694	-1.490 to -0.04924	Yes	*	0.0276
	8.75	8.2	7.56	8.83		7.74	8.66	10.44													wt-aISV vs. aqp1a.1;aqp8a.1_aISV	0.1853	-0.5591 to 0.9297	No	ns	0.9987
	7.61	5.37	7.5	7.59		10.6	8.66	11.28													wt-vISV vs. aqp1a.1_vISV	1.605	0.8929 to 2.317	Yes	****	<0.0001
	6.79	8.22	7.58	7.02		10.39	10.18	9.3													wt-vISV vs. aqp8a.1_vISV	-0.7173	-1.344 to -0.09008	Yes	*	0.0137
	5.53	6.29	9.24	8.46		6.77	9.17	10.54													wt-vISV vs. aqp1a.1;aqp8a.1_vISV	1.078	0.1976 to 1.959	Yes	**	0.0062
	5.39	6.05	7.45	6.73		6.12	6.46	7.13													wt-aISV vs. wt-vISV	-1.05	-1.504 to -0.5973	Yes	****	<0.0001
	6.77	4.36	9.94	8.51		7.64	5.79	10.62													aqp1a.1_aISV vs. aqp1a.1_vISV	-0.3247	-1.136 to 0.4868	No	ns	0.9516
	6.81	6.4	10.16	7.66		9.09	6.75	8.33													aqp8a.1_aISV vs. aqp8a.1_vISV	-0.9983	-1.839 to -0.1577	Yes	**	0.009
	11.01	8.91	8.04			9	5.83	10.68													aqp1a.1;aqp8a.1_aISV vs. aqp1a.1;aqp8a.1_vISV	-0.1574	-1.218 to 0.9031	No	ns	>0.9999
	5.39	4.44	8.07			8.2	5.41	6.34
	5.33	6	5.22			7.16	8.04	8.2													Test details	Mean 1	Mean 2	Mean Diff.	SE of diff.	n1	n2	t	DF
	6.88	8.92				6.51	6.37	11.37													wt-aISV vs. aqp1a.1_aISV	7.34	6.461	0.8793	0.2125	178	63	4.138	582
	7.52	7.5				5.87	8.18	10.51													wt-aISV vs. aqp8a.1_aISV	7.34	8.109	-0.7694	0.2563	178	39	3.002	582
	7.36	6.55				7.74	9.3	8.95													wt-aISV vs. aqp1a.1;aqp8a.1_aISV	7.34	7.155	0.1853	0.2649	178	36	0.6997	582
	6.9	5.06				9.55		10.14													wt-vISV vs. aqp1a.1_vISV	8.391	6.785	1.605	0.2534	148	42	6.334	582
	5.97	6.43				7.88		9.86													wt-vISV vs. aqp8a.1_vISV	8.391	9.108	-0.7173	0.2232	148	59	3.214	582
	5.18	5.4				7.61		6.88													wt-vISV vs. aqp1a.1;aqp8a.1_vISV	8.391	7.312	1.078	0.3134	148	25	3.441	582
	5.43	5.86				9.42		8.63													wt-aISV vs. wt-vISV	7.34	8.391	-1.05	0.1612	178	148	6.515	582
	5.15	8.98				8.75		10.82													aqp1a.1_aISV vs. aqp1a.1_vISV	6.461	6.785	-0.3247	0.2887	63	42	1.124	582
	6.45	5.49				12.22		8.34													aqp8a.1_aISV vs. aqp8a.1_vISV	8.109	9.108	-0.9983	0.2991	39	59	3.337	582
	8.53	7.55				8.18		9.61													aqp1a.1;aqp8a.1_aISV vs. aqp1a.1;aqp8a.1_vISV	7.155	7.312	-0.1574	0.3774	36	25	0.417	582
	6.32	6.14				8.68		9.59
	6.87	5.92				10.95		9.09
	7.26	6.84				8.39		10.17
	8.06	5.36				7.06		8.65
	9.01	10.33				6.77		6.86
	7.29	7.19				8.88		9.66
	5.57	5.27				6.48		7.47
	10.32	6.68				4.93		10.6
	7.9	5.94				9.25		7.15
	5.13	4.29				7.82		10.02
	7	6.5				9.73
	10.57	7.17				9.94
	6.5	4.45				7.29
	9.5	8.97				5.86
	7.92					10.94
	7.34					9.04
	8.37					9.88
	8.15					7.56
	8.55					10.25
	9.28					8.46
	8.84					9.94
	6.63					8.71
	5.69					6.01
	8.52					7.42
	8.87					8.8
	9.1					9.26
	8.68					6.83
	8.18					9.07
	7.34					8.46
	4.53					8.04
	8.37					10.42
	4.84					6.56
	9.96					6.8
	8.61					8.81
	6.58					8.97
	5.97					8.76
	8.71					9.59
	6.93					6.7
	8.64					8.02
	6.92					6.67
	7.16					9.03
	8.28					8.82
	4.73					8.14
	8.32					7.11
	8.98					7.66
	9.79					8.03
	4.43					7.03
	5.72					7.43
	7.25					8.13
	8.58					7.83
	8.62					7.35
	5.47					7.59
	6.59					5.81
	5.81					8.41
	7.01					9.69
	5.6					8.58
	7.17					8.46
	6.78					8.68
	7.06					7.52
	8					8.9
	6.54					7.12
	5.63					9.39
	7.67					10.08
	7.83					8.99
	8.17					8.44
	6.84					9.6
	8.13					8.6
	6.7					7.82
	6.76					9.06
	6.94					10.13
	8.19					10.57
	10.73					5.65
	9.1					7.8
	7.5					7.64
	6.92					7.1
	7.06					9.08
	9.81					7.03
	8.74					9.63
	6.33					8.07
	7.03					9.16
	8.6					7.88
	8.14					9.51
	8.29					10.25
	7.47					9.09
	9.16					8.48
	10.15					9.48
	5.13					9.55
	6.01					10.21
	5.31					7.31
	7.48					7.1
	7.37					8.06
	10.08					9.79
	9.34					8.11
	7.49					9.7
	7.53					7.67
	7.91					8.19
	7.16					10.14
	7.68					8.92
	6.26					10.13
	5.4
	7.78
	6.76
	8.29
	6.97
	5.4
	5.29
	6.98
	8.41
	5.45
	9.02
	9.76
	10.8
	6.05
	5.23
	7.53
	5.87
	8.09
	9.93
	5.81
	6.43
	7.35
	5.16
	7.81
	8.03
	6.36
	6.06
	6.46
	6.47
	9.69

## Sheet: Figure 3-figure supplement 7B
	Figure 3 - figure supplement 7 - Source Data 1
	Figure 3 - figure supplement 7B: Vessel diameter (µm) in wildtype and aquaporin-overexpressing embryos at 2 dpf (pool data from 2 independent experiments).
	arterial ISVs				venous ISVs					arterial ISVs			venous ISVs				ANOVA summary
	wild type (myr-mCherry)	aqp1a.1-mEmerald	aqp8a.1-mEmerald		wild type (myr-mCherry)	aqp1a.1-mEmerald	aqp8a.1-mEmerald			wild type (myr-mCherry)	aqp1a.1-mEmerald	aqp8a.1-mEmerald	wild type (myr-mCherry)	aqp1a.1-mEmerald	aqp8a.1-mEmerald		F	11.03
																	P value	<0.0001
	8.3	6.89	8.42		9.84	9.36	10.97		Number of values	49	53	56	32	58	43		P value summary	****
	6.67	7.7	8.94		9.16	10.01	9.29										Significant diff. among means (P < 0.05)?	Yes
	6.64	6.44	9.48		12.75	8.95	11.13		Minimum	5.29	5.29	5.78	7.23	5.03	6.97		R squared	0.1622
	8.4	8.41	7.18		9.14	11.2	9.58		25% Percentile	7.475	7.07	7.225	9.118	8.798	8.35
	8.77	10.04	5.78		9.54	11.44	12.71		Median	7.97	8.26	8.48	9.88	9.49	9.66		ANOVA table	SS	DF	MS	F (DFn, DFd)	P value
	8.69	7.67	10.18		7.99	7.39	11.82		75% Percentile	8.775	9.435	9.475	11.17	10.53	10.97		Treatment (between columns)	144.2	5	28.83	F (5, 285) = 11.03	P<0.0001
	7.82	6.48	9.78		9.3	9.35	11.82		Maximum	13.13	11.62	12.84	13.7	14.33	12.73		Residual (within columns)	744.7	285	2.613
	10.65	10.04	9.35		9.95	8.87	7.22										Total	888.8	290
	9.8	7.05	7.02		9.9	9.7	11.18		Mean	8.272	8.248	8.603	10.11	9.616	9.643
	7.88	5.96	11.84		11.23	12.58	12.4		Std. Deviation	1.613	1.578	1.525	1.656	1.719	1.609		Data summary
	7.78	7.19	6.79		10.16	9.25	10.6		Std. Error of Mean	0.2305	0.2168	0.2038	0.2928	0.2258	0.2454		Number of treatments (columns)	6
	7.67	5.29	12.84		10.41	5.03	7.44										Number of values (total)	291
	7.6	9.84	9.13		8.23	7.32	6.99		Lower 95% CI	7.808	7.813	8.195	9.516	9.164	9.148
	7.77	8.26	10.56		10.49	8.46	9.04		Upper 95% CI	8.735	8.683	9.011	10.71	10.07	10.14		Multiple comparisons
	9.61	5.69	10.66		8.29	9.37	8.27										Šídák's multiple comparisons test	Mean Diff.	95.00% CI of diff.	Below threshold?	Summary	Adjusted P Value
	9.87	7.95	8.32		10.08	9.86	9.46										wt-aISV vs. aqp1a.1_aISV	0.02333	-0.8423 to 0.8890	No	ns	>0.9999
	11.81	5.9	12.73		9.99	14.33	9.05										wt-aISV vs. aqp8a.1_aISV	-0.3314	-1.186 to 0.5230	No	ns	0.9139
	7.02	8.28	8.43		12.68	9.08	12.73										wt-vISV vs. aqp1a.1_vISV	0.497	-0.4649 to 1.459	No	ns	0.714
	7.9	6.71	6.81		9.11	8.83	9.66										wt-vISV vs. aqp8a.1_vISV	0.47	-0.5497 to 1.490	No	ns	0.8146
	8	8.78	6.53		13.48	8.88	9.15										wt-aISV vs. wt-vISV	-1.841	-2.834 to -0.8484	Yes	****	<0.0001
	8.36	7.36	7.27		9.86	10.53	11.61										aqp1a.1_aISV vs. aqp1a.1_vISV	-1.368	-2.198 to -0.5375	Yes	****	<0.0001
	7.95	9.09	9.54		7.23	9.58	9.68										aqp8a.1_aISV vs. aqp8a.1_vISV	-1.04	-1.925 to -0.1541	Yes	*	0.0117
	8.6	8.16	9.04		11	9.79	7.93
	6.27	7.86	9.28		12.56	10.73	9.07										Test details	Mean 1	Mean 2	Mean Diff.	SE of diff.	n1	n2	t	DF
	7.97	9.43	6.92		8.7	8.64	6.97										wt-aISV vs. aqp1a.1_aISV	8.272	8.248	0.02333	0.3203	49	53	0.07283	285
	5.33	6.19	7		11.49	6.04	10.08										wt-aISV vs. aqp8a.1_aISV	8.272	8.603	-0.3314	0.3162	49	56	1.048	285
	8.78	8.06	6.82		13.7	11.04	9.87										wt-vISV vs. aqp1a.1_vISV	10.11	9.616	0.497	0.3559	32	58	1.396	285
	7.22	9.3	8.83		9.57	9.5	9.93										wt-vISV vs. aqp8a.1_vISV	10.11	9.643	0.47	0.3774	32	43	1.245	285
	13.13	10.26	8.8		8.28	9.13	8.59										wt-aISV vs. wt-vISV	8.272	10.11	-1.841	0.3674	49	32	5.012	285
	7.26	5.49	10.56		7.98	9.02	10.27										aqp1a.1_aISV vs. aqp1a.1_vISV	8.248	9.616	-1.368	0.3072	53	58	4.452	285
	7.72	10.15	8.5		9.68	9.81	9.68										aqp8a.1_aISV vs. aqp8a.1_vISV	8.603	9.643	-1.04	0.3278	56	43	3.172	285
	6.61	11.62	8.26		11.84	9.58	8.35
	8.35	11.24	8.39			12.47	9.78
	8.23	9.75	8.36			10.89	9.23
	7.88	7.63	6.98			9.46	7.13
	8.12	5.52	8.61			10.29	8.12
	8.63	9.55	7.12			8.12	10.33
	10.72	8.09	8.58			7.34	7.38
	10.04	10.88	7.56			9.73	11.96
	10.07	8.25	9.14			12.07	8.89
	10.13	8.97	7.68			7.87	9.85
	11.57	10.67	9.61			11.87	7.91
	7.65	7.09	6.17			9.58	11.52
	6.33	9.26	7.21			9.32
	7.97	7.5	9.46			10.51
	7.54	8.8	9.56			12.94
	7.41	6.38	8.35			8.7
	5.29	9.54	8.26			7.88
	5.53	9.01	8.6			8.48
		8.5	7.13			7.97
		8.47	8.6			11.59
		9.08	7.34			12.62
		9.44	8.46			9.82
			10.62			9.02
			7.97			9.48
			10.42			10.26
						10.54
						6.25
