# Supplementary material for: Combined forces of hydrostatic pressure and actin polymerization drive endothelial tip cell migration and sprouting angiogenesis
Source: eLife. 2025 Feb 20;13:RP98612. doi: 10.7554/eLife.98612 (PMC11841990; doi:10.7554/eLife.98612)
Supplement: Figure 3—source data 1. [file elife-98612-fig3-data1.xlsx]

## Sheet: Figure 3E
	Figure 3 - Source Data 1
	Figure 3E: ISV length (µm) at different positions along the trunk in 28 hpf embryos (pool data from 2 independent experiments)
	ISV4					ISV5					ISV6					ISV7					ISV8					ISV9					ISV10					ISV11					ISV12					ISV13
	aqp1a.1+/-aqp8a.1+/-	aqp1a.1-/-	aqp8a.1-/-	aqp1a.1-/-aqp8a.1-/-		aqp1a.1+/-aqp8a.1+/-	aqp1a.1-/-	aqp8a.1-/-	aqp1a.1-/-aqp8a.1-/-		aqp1a.1+/-aqp8a.1+/-	aqp1a.1-/-	aqp8a.1-/-	aqp1a.1-/-aqp8a.1-/-		aqp1a.1+/-aqp8a.1+/-	aqp1a.1-/-	aqp8a.1-/-	aqp1a.1-/-aqp8a.1-/-		aqp1a.1+/-aqp8a.1+/-	aqp1a.1-/-	aqp8a.1-/-	aqp1a.1-/-aqp8a.1-/-		aqp1a.1+/-aqp8a.1+/-	aqp1a.1-/-	aqp8a.1-/-	aqp1a.1-/-aqp8a.1-/-		aqp1a.1+/-aqp8a.1+/-	aqp1a.1-/-	aqp8a.1-/-	aqp1a.1-/-aqp8a.1-/-		aqp1a.1+/-aqp8a.1+/-	aqp1a.1-/-	aqp8a.1-/-	aqp1a.1-/-aqp8a.1-/-		aqp1a.1+/-aqp8a.1+/-	aqp1a.1-/-	aqp8a.1-/-	aqp1a.1-/-aqp8a.1-/-		aqp1a.1+/-aqp8a.1+/-	aqp1a.1-/-	aqp8a.1-/-	aqp1a.1-/-aqp8a.1-/-
	111.2	90.6	104.5	113.9		110.8	67.1	100.2	0		117.1	53.8	108.3	0		113.8	44.7	66.6	35.5		108.1	26.7	68.7	0		109.2	31.4	110.1	14.8		103.7	42	43.2	8.1		106.7	0	108.4	0		107.6	21.9	104.9	14.7		100.7	32.4	99.1	0
	117.4	97.9	103.9	0		116.8	62.9	105.9	55.7		115.8	37.4	108.4	27.5		124	45.8	63.8	0		119.6	14.1	76.8	16.3		111.3	0	111	0		111.6	28.6	62.4	9.7		111.3	17.8	58.2	26.5		106.9	29.7	109.2	19.5		101.3	0	39.8	41.9
	106.6	112	100.1	105		107.7	107.3	107.2	57.6		109.1	76.6	100.4	111.4		111.4	106.6	110.7	53.8		115.4	108.8	111.5	77.2		108.4	67.8	62.4	62.5		112.8	69.7	109.8	69.3		103.4	60.9	45.9	63.2		106.2	59	103.3	62.8		107.6	98.1	96.4	75.4
	104.5	93.2	102	50.7		106.9	108.3	108.1	93		106.3	116.1	66.9	54.6		103.7	115.3	61.9	99.5		106.7	114.2	102.5	0		104.7	61.3	59.8	57.5		99	70.2	43.8	71.8		103.9	68	108.4	89.7		102.6	100.7	40.7	26.2		53.1	90	105.2	46
	102.8	105.4	100.5	110.2		115.2	75.2	107.1	55		117.9	67.5	69.8	59.7		126.5	66.6	107.8	7.8		128.7	52.9	107.4	39.6		122.2	45.9	106.9	26.2		116.2	16	112.3	28.2		118.8	43.2	105.8	14.6		117.7	0	106.6	49.8		112.1	0	84.3	36.8
	104.2	111.7	105.8	105.4		121.4	111.9	108.7	50.8		121.4	56	107.9	96.4		123	53	113	33.1		121.8	38.4	106.8	16.6		122.4	0	107.2	0		116	45.9	59.2	49.3		113.4	27.6	70.4	0		111.5	0	61	27.8		116.5	0	47.5	0
	98.7	103.4	96.9	35.8		80.8	113.3	113.3	101.8		103	75.6	92.7	0		110.9	59.8	99.7	98.8		108.9	31.6	54.1	47.7		107	64.7	93.7	74.2		102.3	59.4	99.7	56.7		104.9	56.6	58	95.8		97.7	71	101.8	0		90.9	59.5	52.7	59.3
	110.4	104.6	100.3	112.1		107.8	44.8	109.8	107.3		108.5	57.4	102.1	105.8		110.9	0	51.9	49.5		110.4	61.4	79.1	103.5		117.4	55.2	86.7	44.2		110.5	59.7	100.5	46.9		112	52.2	110.6	0		111.9	101.4	59.6	0		104.7	50.6	97	55.4
	115.7	112.6	100.7	107.7		117.3	108.3	104.4	104.3		123.8	108.4	105.2	22.8		113.1	64.9	103.6	58.1		121.9	107.4	81.8	56.1		115.8	107.3	115.5	62.2		112.3	103.6	60	56.4		118.8	92.3	108.4	13.7		104.3	58.1	101.7	0		112.1	107.6	98.3	36.8
	113.7	110.2	105.1	107.2		113.7	114.3	109	42.5		120.3	112	111.1	55.4		120.8	113.6	111.9	109.1		116.9	112.9	110.4	52		116.5	92.7	110.9	58.2		113.4	108.9	111.6	47.9		111.7	101.2	111	17.5		110.7	97.8	106.9	18.6		108.7	93	96.5	20.7
	103.5	109.9	104.4	112.2		105.3	67.6	101.9	99.6		113.7	56.3	96.6	106.7		104.1	0	104.3	108		111.5	32.1	100.9	30.2		117.8	20.5	96.8	106.8		110.1	25.7	99.3	107.9		109.2	37.9	98	69.8		110.1	30.9	98.1	56.2		116	57.3	97	56.9
	103.6	105.1	111.7	113.3		108.8	107.3	113.8	109.4		112.7	107.8	48	103.4		114	28	112.4	0		114.1	29.6	106.5	48.8		114.2	49.2	104.9	50		107.3	46.4	101.5	104.2		106.4	33	103.8	0		109.4	0	103.8	78		107.1	20.2	103.7	26.2
	118.9	107.3	98.5	0		122.1	58.8	108.2	30.3		122.3	49.9	106.5	55.6		119.8	47.5	103.5	0		118.5	65.7	103.5	18.2		106	74.8	101.7	24.1		109.6	67.9	116.7	15.7		114.4	63.4	114.9	36		106.7	71.2	70.2	18.3		114.9	97.7	114.3	0
	110.3	116.6	111.9	110.7		115.1	57.2	115.8	44.5		116.4	41.4	121.1	17		111.1	59.4	109.6	44.5		113.3	58.8	111.2	0		54.2	52.5	106.4	88.3		111.2	52.6	56.7	63.1		105.4	57.6	104.7	39.4		73.7	74	57.6	0		102.7	45.7	71.2	0
	103.4		109.5	116.5		102.6	78.8	63.2	115.9		108.1	110.4	108	108.6		115.4	69.5	109.5	50.3		100.7	61.7	113.3	28.3		104.9	51.1	108.7	23.1		115	48.1	111.5	102.5		104.6	25.5	106.1	59		112	71.7	104.6	51.9		102.3	61.5	65.1	43.3
	106.3		112.1	112.3		107.8	105.6	108.3	59.3		103.4	48.5	110.8	108		113.1	52.2	107	50.1		113.7	41.4	112.3	87.3		102.2	85.1	79.7	35.1		108.6	22.1	106.8	48.2		106.5	110.4	103	40		56.9	24.8	98.9	40.3		64	54.4	107.8	32.7
	108.4		101.3	103.5		116.2	113.7	107.1	52		119.2	123.7	61.5	42.9		118.1	77.7	44	47.5		114.9	110.8	52.6	44.9		110.3	63.3	102.5	102.3		114.9	111.2	57.4	60.9		103.9	113.8	17.7	112.4		112.7	117.6	19.9	39.9		108.8	108.3	45.4	85.2
	113.2		102.4	112.6		117.1	107.7	109.6	107.2		119.1	66	102	54.5		116.5	55.2	56.3	60.2		119.2	82.2	59.8	53.9		119.9	112.5	51.5	41.7		111.6	0	0	43.6		112.3	98.8	20.7	111.8		105	51.2	43.4	61.6		109.1	45	15	62.4
	101		101.3	65		106.6		105.9	103.3		118.1		105.6	103.9		112.5		107	103.1		102.2		80.1	60.6		116.5		111.8	116.2		106		113.5	48.8		110.9		77.6	47.9		115.5		105.9	0		106.5		108.5	52.1
	115.7		103.9	34		110.7		101.9	47.2		113.5		108.6	0		112		105.1	0		115.5		103.7	96.3		111.3		108.6	40.3		105.7		48.5	33.1		108.7		101	30.7		104		97.4	0		100		99	43.2
	105.7			113.2		104.9			63.2		113.4			0		112.2			0		110.2			20.8		107.6			0		109.2			0		105.6			0		107.4			0		89.2			0
	110.2			107.8		110.8			0		113.3			0		116.7			33.7		113.5			0		113.8			0		113.5			0		109.6			0		112.2			0		110.9			0
	104.5			47.3		104.9			109.8		115.2			116.5		113.3			112.5		113.4			116.2		67.7			69.8		110			110.8		118			64.5		108.9			100.5		61.5			107.7
	104.7			107		102.1			68		108.8			108.2		114.3			107.7		111.8			102.1		115.6			106.8		50			47.3		106.3			89.7		105.4			44.1		107.1			79.3
	107.5			111.8		109.8			112.6		110.4			0		114.9			16.9		116.1			51.5		114.6			10.4		113.4			0		109.9			52.6		107.3			22.2		104.9			0
	112			106.9		114			54.8		120.8			0		114.6			0		117.5			56.5		113.4			53.2		109.7			0		109.8			61		111.5			0		108.9			15
	98.1			114		105.9			113.1		109.3			85.6		55.9			93.7		48.1			59.9		107			95.4		105.3			93.8		100.9			99.5		55.4			57.6		109.1			92.8
	111.6			104.4		77.9			116		101.6			108		114			107.6		50.8			113.7		67.9			108.5		50.3			116.7		102.1			103.1		110.7			102.8		108.2			62.3
	115.2			110.5		120.5			0		120.9			45.5		119.5			44.3		125			59		122.1			63.8		122.4			65		120.4			112.1		115.5			57.5		114.1			51.8
	115.2			110.6		116.3			112		126.4			36		121.9			61.9		119.4			74.1		117.7			58.6		114			62.4		127.6			63.7		110.7			51.3		113.1			62.7
	107.8			55.2		107			114.4		106.8			79.1		112.6			100.4		112.3			103.1		117.9			110.5		119.7			100.7		115.5			99		110.9			89.4		102.9			52.6
	105.5			110.5		109.1			111.7		107.1			112.6		114.6			0		113.3			101.8		111.9			109.9		108.3			102.9		108			100.9		109.8			45.9		108.9			77.7
	110.1			104.2		112.7			55.3		116.4			39.7		110.6			60		116.4			59.9		120.6			77		113.3			0		112.2			45.9		116.7			0		107.4			31.9
	121.9			26.9		116.4			28.8		114.5			54.4		118.4			70.9		117.2			54.6		116.6			65.2		118.1			33.7		115.1			52.9		75.6			37.3		104.2			0
	99.6			104.9		101.9			103.3		106.8			59		111.4			62.4		105.1			108.8		105.1			106.2		102.4			59.4		104.8			50.4		106.8			62.2		91.7			42.9
	102.4					93			107.1		100.3			47.8		102.8			105.7		102.7			29.7		103.1			57.5		98.6			67		101.4			0		99.8			26.5		102.3			38.6
	112.8					114.3			116.3		112.4			0		116.5			62.8		109.4			55		109.8			44.9		113.6			60.3		110.8			65.3		108.2			30.2		109.6			54.3
	114.3					117			114.8		115.1			28.5		119.5			23.6		117.2			41.4		113.2			56.9		109.8			62.6		109.8			0		107.1			54		103.2			55.6
	95.7					102.8					104.7					107.5					70.8					115.5					107.2					71.5					104.5					105.8
	106.2					103.8					110.1					113.9					114.2					115.6					74.3					110.7					100.5					110.3
	104.3					109.1					104					115.1					120.1					114.5					115.9					105.3					112.7					104.5
	111.4					116.7					112.8					115.3					121.5					116.9					112.7					119.8					112.7					113.7
	Note
	Every value corresponds to a single vessel. Vessels on both side of the embryo were measured.
	"0" no vessel in this position.
	aqp1a.1+/-;aqp8a.1+/-			n=21 (42 ISVs)
	aqp1a.1-/-			n=9 (18 ISVs)
	aqp8a.1-/-			n=10 (20 ISVs)
	aqp1a.1-/-;aqp8a.1-/-			n=19 (38 ISVs)
