# Supplementary material for: Combined forces of hydrostatic pressure and actin polymerization drive endothelial tip cell migration and sprouting angiogenesis
Source: eLife. 2025 Feb 20;13:RP98612. doi: 10.7554/eLife.98612 (PMC11841990; doi:10.7554/eLife.98612)
Supplement: Figure 4—figure supplement 1—source data 1. [file elife-98612-fig4-figsupp1-data1.xlsx]

## Sheet: Figure 4-figure supplement 1A
	Figure 4 - figure supplement 1 - Source Data 1
	Figure 4 - figure supplement 1A: Endothelial cell number in arterial ISVs of wildtype and aquaporin mutants at 2 and 3 dpf.
		No. of arterial ISVs
	No. of nuclei per ISV	2 dpf				3 dpf
		wild type	aqp1a.1-/-	aqp8a.1-/-	aqp1a.1-/-aqp8a.1-/-	wild type	aqp1a.1-/-	aqp8a.1-/-	aqp1a.1-/-aqp8a.1-/-		aISVs, 2 dpf	wild type	aqp1a.1-/-	aqp8a.1-/-	aqp1a.1-/-aqp8a.1-/-		ANOVA summary (aISVs, 2 dpf)							Multiple comparison (aISVs, 2 dpf)
	1	2	17	0	10	0	0	1	0		Number of values	273	189	84	65		F	29.47						Šídák's multiple comparisons test	Mean Diff.	95.00% CI of diff.	Below threshold?	Summary	Adjusted P Value
	2	69	68	21	38	0	10	8	28								P value	<0.0001						wt vs. aqp1a.1-/-	0.4428	0.2637 to 0.6220	Yes	****	<0.0001
	3	139	90	43	16	19	35	52	45		Minimum	1	1	2	1		P value summary	****						wt vs. aqp8a.1-/-	-0.008242	-0.2445 to 0.2280	No	ns	0.9997
	4	53	9	18	1	45	27	76	28		25% Percentile	2	2	2.25	2		Significant diff. among means (P < 0.05)?	Yes						wt vs. aqp1a.1-/-;aqp8a.1-/-	0.8806	0.6193 to 1.142	Yes	****	<0.0001
	5	9	5	2	0	28	14	28	1		Median	3	3	3	2		R squared	0.1271
	6	1	0	0	0	5	0	9	0		75% Percentile	3	3	3	3									Test details	Mean 1	Mean 2	Mean Diff.	SE of diff.	n1	n2	t	DF
	7	0	0	0	0	1	0	1	0		Maximum	6	5	5	4		ANOVA table	SS	DF	MS	F (DFn, DFd)	P value		wt vs. aqp1a.1-/-	3.004	2.561	0.4428	0.07483	273	189	5.918	607
																	Treatment (between columns)	55.28	3	18.43	F (3, 607) = 29.47	P<0.0001		wt vs. aqp8a.1-/-	3.004	3.012	-0.008242	0.09866	273	84	0.08353	607
											Mean	3.004	2.561	3.012	2.123		Residual (within columns)	379.6	607	0.6253				wt vs. aqp1a.1-/-;aqp8a.1-/-	3.004	2.123	0.8806	0.1091	273	65	8.069	607
											Std. Deviation	0.8021	0.8269	0.7524	0.6733		Total	434.8	610
											Std. Error of Mean	0.04855	0.06015	0.08209	0.08352
																	Data summary
											Lower 95% CI	2.908	2.442	2.849	1.956		Number of treatments (columns)	4
											Upper 95% CI	3.099	2.679	3.175	2.29		Number of values (total)	611
											aISVs, 3 dpf	wild type	aqp1a.1-/-	aqp8a.1-/-	aqp1a.1-/-aqp8a.1-/-		ANOVA summary (aISVs, 3 dpf)							Multiple comparison (aISVs, 3 dpf)
											Number of values	98	86	175	102		F	34.41						Šídák's multiple comparisons test	Mean Diff.	95.00% CI of diff.	Below threshold?	Summary	Adjusted P Value
																	P value	<0.0001						wt vs. aqp1a1-/-	0.7012	0.3853 to 1.017	Yes	****	<0.0001
											Minimum	3	2	1	2		P value summary	****						wt vs. aqp8a1-/-	0.3502	0.08046 to 0.6199	Yes	**	0.0059
											25% Percentile	4	3	3	2		Significant diff. among means (P < 0.05)?	Yes						wt vs. aqp1a1-/-;aqp8a1-/-	1.205	0.9025 to 1.507	Yes	****	<0.0001
											Median	4	3	4	3		R squared	0.1843
											75% Percentile	5	4	4	4									Test details	Mean 1	Mean 2	Mean Diff.	SE of diff.	n1	n2	t	DF
											Maximum	7	5	7	5		ANOVA table	SS	DF	MS	F (DFn, DFd)	P value		wt vs. aqp1a1-/-	4.224	3.523	0.7012	0.1318	98	86	5.32	457
																	Treatment (between columns)	82.16	3	27.39	F (3, 457) = 34.41	P<0.0001		wt vs. aqp8a1-/-	4.224	3.874	0.3502	0.1126	98	175	3.111	457
											Mean	4.224	3.523	3.874	3.02		Residual (within columns)	363.7	457	0.7959				wt vs. aqp1a1-/-aqp8a1-/-	4.224	3.02	1.205	0.1262	98	102	9.548	457
											Std. Deviation	0.8559	0.9039	0.9686	0.7705		Total	445.9	460
											Std. Error of Mean	0.08646	0.09747	0.07322	0.07629
																	Data summary
											Lower 95% CI	4.053	3.329	3.73	2.868		Number of treatments (columns)	4
											Upper 95% CI	4.396	3.717	4.019	3.171		Number of values (total)	461

## Sheet: Figure 4-figure supplement 1B
	Figure 4 - figure supplement 1 - Source Data 1
	Figure 4 - figure supplement 1B: Endothelial cell number in venous ISVs of wildtype and aquaporin mutants at 2 and 3 dpf.
		No. of venous ISVs
	No. of nuclei per ISV	2 dpf				3 dpf
		wild type	aqp1a.1-/-	aqp8a.1-/-	aqp1a.1-/-aqp8a.1-/-	wild type	aqp1a.1-/-	aqp8a.1-/-	aqp1a.1-/-aqp8a.1-/-		vISVs, 2 dpf	wild type	aqp1a.1-/-	aqp8a.1-/-	aqp1a.1-/-aqp8a.1-/-		ANOVA summary (vISVs, 2 dpf)							Multiple comparison (vISVs, 2 dpf)
	1	0	0	0	0	0	0	0	0		Number of values	266	143	121	95		F	26.96						Šídák's multiple comparisons test	Mean Diff.	95.00% CI of diff.	Below threshold?	Summary	Adjusted P Value
	2	0	6	1	7	0	0	0	0								P value	<0.0001						wt vs. aqp1a.1-/-	0.5648	0.2609 to 0.8688	Yes	****	<0.0001
	3	12	22	1	23	0	3	4	5		Minimum	3	2	2	2		P value summary	****						wt vs. aqp8a.1-/-	-0.07789	-0.3993 to 0.2435	No	ns	0.916
	4	56	29	20	33	1	4	13	15		25% Percentile	4	4	5	3		Significant diff. among means (P < 0.05)?	Yes						wt vs. aqp1a.1-/-;aqp8a.1-/-	1.159	0.8083 to 1.509	Yes	****	<0.0001
	5	84	45	50	19	4	18	34	37		Median	5	5	5	4		R squared	0.1152
	6	72	27	26	6	15	38	65	38		75% Percentile	6	6	6	5									Test details	Mean 1	Mean 2	Mean Diff.	SE of diff.	n1	n2	t	DF
	7	32	12	21	6	33	42	75	39		Maximum	9	8	8	8		ANOVA table	SS	DF	MS	F (DFn, DFd)	P value		wt vs. aqp1a.1-/-	5.327	4.762	0.5648	0.127	266	143	4.449	621
	8	9	2	2	1	39	23	48	22								Treatment (between columns)	121.2	3	40.41	F (3, 621) = 26.96	P<0.0001		wt vs. aqp8a.1-/-	5.327	5.405	-0.07789	0.1343	266	121	0.5802	621
	9	1	0	0	0	16	11	27	3		Mean	5.327	4.762	5.405	4.168		Residual (within columns)	930.9	621	1.499				wt vs. aqp1a.1-/-;aqp8a.1-/-	5.327	4.168	1.159	0.1463	266	95	7.918	621
	10	0	0	0	0	12	4	13	1		Std. Deviation	1.186	1.342	1.085	1.31		Total	1052	624
	11	0	0	0	0	1	0	1	0		Std. Error of Mean	0.0727	0.1123	0.0986	0.1344
																	Data summary
											Lower 95% CI	5.184	4.54	5.21	3.902		Number of treatments (columns)	4
											Upper 95% CI	5.47	4.984	5.6	4.435		Number of values (total)	625
											vISVs, 3 dpf	wild type	aqp1a.1-/-	aqp8a.1-/-	aqp1a.1-/-aqp8a.1-/-		ANOVA summary (vISVs, 3 dpf)							Multiple comparison (vISVs, 3 dpf)
											Number of values	121	143	280	160		F	28.84						Šídák's multiple comparisons test	Mean Diff.	95.00% CI of diff.	Below threshold?	Summary	Adjusted P Value
																	P value	<0.0001						wt vs. aqp1a1-/-	0.9892	0.5611 to 1.417	Yes	****	<0.0001
											Minimum	4	3	3	3		P value summary	****						wt vs. aqp8a1-/-	0.8561	0.4790 to 1.233	Yes	****	<0.0001
											25% Percentile	7	6	6	5		Significant diff. among means (P < 0.05)?	Yes						wt vs. aqp1a1-/-;aqp8a1-/-	1.615	1.197 to 2.033	Yes	****	<0.0001
											Median	8	7	7	6		R squared	0.11
											75% Percentile	8	8	8	7									Test details	Mean 1	Mean 2	Mean Diff.	SE of diff.	n1	n2	t	DF
											Maximum	11	10	11	10		ANOVA table	SS	DF	MS	F (DFn, DFd)	P value		wt vs. aqp1a1-/-	7.702	6.713	0.9892	0.1789	121	143	5.531	700
																	Treatment (between columns)	181.4	3	60.48	F (3, 700) = 28.84	P<0.0001		wt vs. aqp8a1-/-	7.702	6.846	0.8561	0.1575	121	280	5.434	700
											Mean	7.702	6.713	6.846	6.088		Residual (within columns)	1468	700	2.097				wt vs. aqp1a1-/-;aqp8a1-/-	7.702	6.088	1.615	0.1744	121	160	9.258	700
											Std. Deviation	1.314	1.417	1.543	1.398		Total	1649	703
											Std. Error of Mean	0.1195	0.1185	0.09222	0.1105
																	Data summary
											Lower 95% CI	7.466	6.479	6.665	5.869		Number of treatments (columns)	4
											Upper 95% CI	7.939	6.948	7.028	6.306		Number of values (total)	704

## Sheet: Figure 4-figure supplement 1C
	Figure 4 - figure supplement 1 - Source Data 1
	Figure 4 - figure supplement 1C: Number of mitotic tip and stalk cells per ISV in aqp1a.1+/-;aqp8a.1+/- and aqp1a.1-/-;aqp8a.1-/- embryos from 21 to 30 hpf.
				Time of division (hours:minutes)	No. of cells at 30 hpf	No. of mitotic tip cells	No. of mitotic stalk cells		aqp1a.1+/-;aqp8a.1+/-		aqp1a.1-/-;aqp8a.1-/-			ANOVA summary
		Experiment 1							Tip cell	Stalk cell	Tip cell	Stalk cell		F	6.806
		embryo 1	ISV1	no exit of nucleus from the dorsal aorta	0				1	0	0.5	0		P value	0.0018
		(mutant)	ISV2	no exit of nucleus from the dorsal aorta	0				0.57	0.14	0.25	0.25		P value summary	**
			ISV3	no exit of nucleus from the dorsal aorta	0				0	0.29	0.67	0.17		Significant diff. among means (P < 0.05)?	Yes
			ISV4	no division	1	0	0		0.71	0.14	0.25	0		R squared	0.4597
			ISV5	Tip cell (27:12)	2	1	0		1	0.14	0.33	0
		embryo 2	ISV1	no division	1	0	0				0.67	0.17		Brown-Forsythe test
		(mutant)	ISV2	no division	1	0	0				1	0.5		F (DFn, DFd)	2.272 (3, 24)
			ISV3	Tip cell (27:06); Stalk cell (29:00)	3	1	1				1	0		P value	0.1059
			ISV4	no division	1	0	0				0.2	0		P value summary	ns
		embryo 3	ISV1	Tip cell (24:30)	2	1	0		0.656	0.142	0.541	0.121		Are SDs significantly different (P < 0.05)?	No
		(heterozygote)	ISV2	Tip cell (25:48)	3	1	0
			ISV3	Tip cell (26:18)	4	1	0							Bartlett's test
			ISV4	Tip cell (22:00)	3	1	0							Bartlett's statistic (corrected)	8.404
			ISV5	Tip cell (29:30)	3	1	0							P value	0.0384
			ISV6	Tip cell (23:48)	2	1	0							P value summary	*
		Experiment 2												Are SDs significantly different (P < 0.05)?	Yes
		embryo 1	ISV1	Tip cell (24:12)	2	1	0
		(mutant)	ISV2	Tip cell (23:42)	2	1	0							ANOVA table	SS	DF	MS	F (DFn, DFd)	P value
			ISV3	no division	2	0	0							Treatment (between columns)	1.484	3	0.4946	F (3, 24) = 6.806	P=0.0018
			ISV4	Stalk cell (29:30)	3	0	1							Residual (within columns)	1.744	24	0.07267
			ISV5	Tip cell (24:00)	2	1	0							Total	3.228	27
			ISV6	Tip cell (24:42)	3	1	0
			ISV7	no division	3	0	0							Data summary
		embryo 2	ISV1	Stalk cell (29:12)	3	0	1							Number of treatments (columns)	4
		(heterozygote)	ISV2	no division	2	0	0							Number of values (total)	28
			ISV3	no division	1	0	0
			ISV4	no division	1	0	0							Multiple comparisons
			ISV5	no division	2	0	0							Šídák's multiple comparisons test	Mean Diff.	95.00% CI of diff.	Below threshold?	Summary	Adjusted P Value
			ISV6	no division	2	0	0							TC_het vs. TC_mut	0.1149	-0.2437 to 0.4735	No	ns	0.7
			ISV7	Stalk cell (28:00)	3	0	1							SC_het vs. SC_mut	0.02089	-0.3377 to 0.3795	No	ns	0.988
		embryo 3	ISV1	Tip cell (29:36)	3	1	0
		(heterozygote)	ISV2	Tip cell (30:00)	3	1	0							Test details	Mean 1	Mean 2	Mean Diff.	SE of diff.	n1	n2	t	DF
			ISV3	no division	2	0	0							TC_het vs. TC_mut	0.656	0.5411	0.1149	0.1504	5	9	0.7641	24
			ISV4	Stalk cell (26:12)	4	0	1							SC_het vs. SC_mut	0.142	0.1211	0.02089	0.1504	5	9	0.1389	24
			ISV5	Tip cell (26:24)	2	1	0
			ISV6	Tip cell (23:54)	3	1	0
			ISV7	Tip cell (25:06)	3	1	0
		Experiment 3
		embryo 1	ISV1	Tip cell (24:34)	3	1	0
		(mutant)	ISV2	no division	2	0	0
			ISV3	Tip cell (28:34)	3	1	0
			ISV4	Stalk cell (23:17)	3	0	1
			ISV5	Tip cell (23:38)	2	1	0
			ISV6	Tip cell (24:00)	2	1	0
		embryo 2	ISV1	no division	1	0	0
		(mutant)	ISV2	no division	1	0	0
			ISV3	Tip cell (27:47)	1	1	0
			ISV4	no division	1	0	0
		embryo 3	ISV1	no division	1	0	0
		(mutant)	ISV2	Tip cell (27:10)	2	1	0
			ISV3	no division	1	0	0
			ISV4	no exit of nucleus from the dorsal aorta	0
		embryo 4	ISV1	Tip cell (21:38)	2	1	0
		(heterozygote)	ISV2	Stalk cell (24:12); Tip cell (26:20)	4	1	1
			ISV3	Tip cell (24:33)	3	1	0
			ISV4	Tip cell (27:18)	2	1	0
			ISV5	Tip cell (22:48)	2	1	0
			ISV6	no division	2	1	0
			ISV7	Tip cell (28:00)	3	1	0
		Experiment 4
		embryo 1	ISV1	Tip cell (24:00)	2	1	0
		(mutant)	ISV2	no exit of nucleus from the dorsal aorta	0
			ISV3	Tip cell (29:18)	2	1	0
			ISV4	Tip cell (27:06)	3	1	0
			ISV5	no division	1	0	0
			ISV6	Tip cell (26:40); Stalk cell (27:30)	3	1	1
		embryo 2	ISV1	TC: 24h	2	1	0
		(mutant)	ISV2	Stalk cell (23:24); Tip cell (25:23)	3	1	1
			ISV3	Tip cell (24:48)	3	1	0
			ISV4	Tip cell (23:24); Stalk cell (24:40)	3	1	1
		embryo 3	ISV1	Tip cell (23:17)	2	1	0
		(mutant)	ISV2	Tip cell (25:00)	2	1	0
			ISV3	Tip cell (24:06)	2	1	0
			ISV4	Tip cell (30:00)	2	1	0
			ISV5	Tip cell (23:48)	2	1	0
		Experiment 5
		embryo 1	ISV1	Tip cell (25:23)	2	1	0
		(mutant)	ISV2	no division	1	0	0
			ISV3	no exit of nucleus from the dorsal aorta	0
			ISV4	no division	1	0	0
			ISV5	no division	1	0	0
