# Supplementary material for: Combined forces of hydrostatic pressure and actin polymerization drive endothelial tip cell migration and sprouting angiogenesis
Source: eLife. 2025 Feb 20;13:RP98612. doi: 10.7554/eLife.98612 (PMC11841990; doi:10.7554/eLife.98612)
Supplement: Figure 4—source data 1. [file elife-98612-fig4-data1.xlsx]

## Sheet: Figure 4A
	Figure 4 - Source Data 1
	Figure 4A: Timing of tip cell nuclei emergence from the dorsal aorta
	Time, h:min	aqp1a.1+/-aqp8a.1+/-	aqp1a.1-/-aqp8a.1-/-
	20:00:00				Each value represents number of events (nucleus emergence from the dorsal aorta)
	20:07:00
	20:14:00
	20:21:00
	20:28:00
	20:35:00
	20:42:00
	20:49:00	1
	20:56:00	2
	21:03:00	2
	21:10:00
	21:17:00
	21:24:00	1
	21:31:00	1
	21:38:00	1
	21:45:00	3
	21:52:00	1
	21:59:00
	22:06:00	2	4
	22:13:00	1
	22:20:00	2	1
	22:27:00	1	1
	22:34:00	1	1
	22:41:00	1	2
	22:48:00	1
	22:55:00	1
	23:02:00
	23:09:00		2
	23:16:00
	23:23:00
	23:30:00
	23:37:00
	23:44:00
	23:51:00	1
	23:58:00		2
	24:05
	24:12		2
	24:19		2
	24:36
	24:43		2
	24:50		1
	24:57
	25:04
	25:11		3
	25:18
	25:25
	25:32
	25:39		1
	25:46
	25:53
	26:00		1
	26:07
	26:14
	26:21
	26:28
	26:35		1
	26:42
	26:49
	26:56
	27:03
	27:10
	27:17
	27:24		1
	27:31
	27:38
	27:45
	27:52
	27:59

## Sheet: Figure 4H
	Figure 4 - Source Data 1
	Figure 4H: Average number of filopodia / 100 µm (pool data from 2 independent experiments)
	aqp1a.1+/+aqp8a.1+/+	aqp1a.1+/-aqp8a.1+/-	aqp1a.1-/-aqp8a.1-/-			aqp1a.1+/+aqp8a.1+/+	aqp1a.1+/-aqp8a.1+/-	aqp1a.1-/-aqp8a.1-/-		Multiple comparisons
	17	15	7		Number of values	36	19	28		Dunnett's T3 multiple comparisons test	Mean Diff.	95.00% CI of diff.	Below threshold?	Summary	Adjusted P Value
	11	10	10							aqp1a.1+/-;aqp8a.1+/- vs. aqp1a.1-/-;aqp8a.1-/-	9.932	5.523 to 14.34	Yes	****	<0.0001	A-B
	17	14	20		Minimum	10	10	3		aqp1a.1+/-;aqp8a.1+/- vs. aqp1a.1+/+;aqp8a.1+/+	1.039	-3.214 to 5.293	No	ns	0.9009	A-C
	13	17	25		Maximum	31	35	25		aqp1a.1-/-;aqp8a.1-/- vs. aqp1a.1+/+;aqp8a.1+/+	-8.893	-12.10 to -5.682	Yes	****	<0.0001	B-C
	15	21	8		Range	21	25	22
	23	17	8							Test details	Mean 1	Mean 2	Mean Diff.	SE of diff.	n1	n2	t	DF
	23	22	10		Mean	18.75	19.79	9.857		aqp1a.1+/-;aqp8a.1+/- vs. aqp1a.1-/-;aqp8a.1-/-	19.79	9.857	9.932	1.759	19	28	5.645	33.63
	16	15	4		Std. Deviation	5.14	6.347	5.226		aqp1a.1+/-;aqp8a.1+/- vs. aqp1a.1+/+;aqp8a.1+/+	19.79	18.75	1.039	1.689	19	36	0.6153	30.72
	13	18	8		Std. Error of Mean	0.8567	1.456	0.9876		aqp1a.1-/-;aqp8a.1-/- vs. aqp1a.1+/+;aqp8a.1+/+	9.857	18.75	-8.893	1.307	28	36	6.802	57.71
	23	35	4
	22	30	3							ANOVA results
	22	18	7							Brown-Forsythe ANOVA test
	19	19	3							F* (DFn, DFd)	24.98 (2.000, 57.00)
	17	29	9							P value	<0.0001
	20	23	12							P value summary	****
	27	23	16							Significant diff. among means (P < 0.05)?	Yes
	24	16	12
	13	22	19							Welch's ANOVA test
	19	12	14							W (DFn, DFd)	27.36 (2.000, 43.14)
	12		8							P value	<0.0001
	24		8							P value summary	****
	31		11							Significant diff. among means (P < 0.05)?	Yes
	20		8
	21		4							Data summary
	22		6							Number of treatments (columns)	3
	24		11							Number of values (total)	83
	25		12
	15		9
	14
	16
	10
	13
	17
	14
	16
	27
	Note
	Each value corresponds to a single vessel.

## Sheet: Figure 4I
	Figure 4 - Source Data 1
	Figure 4I: Length of filopodia (µm) (pool data from 2 independent experiments)
	aqp1a.1+/+aqp8a.1+/+	aqp1a.1+/-aqp8a.1+/-	aqp1a.1-/-aqp8a.1-/-			aqp1a.1+/+aqp8a.1+/+	aqp1a.1+/-aqp8a.1+/-	aqp1a.1-/-aqp8a.1-/-		Multiple comparisons
	3.768	6.153	5.115		Number of values	382	200	123		Šídák's multiple comparisons test	Mean Diff.	95.00% CI of diff.	Below threshold?	Summary	Adjusted P Value
	2.947	3.36	4.562							aqp1a.1+/+;aqp8a.1+/+ vs. aqp1a.1+/-;aqp8a.1+/-	-0.3272	-0.9824 to 0.3280	No	ns	0.5477	A-B
	3.4	2.434	6.839		Minimum	2.501	1.629	1.235		aqp1a.1+/+;aqp8a.1+/+ vs. aqp1a.1-/-;aqp8a.1-/-	1.069	0.2904 to 1.847	Yes	**	0.0032	A-C
	3.418	2.62	2.058		25% Percentile	3.591	3.531	3.188		aqp1a.1+/-;aqp8a.1+/- vs. aqp1a.1-/-;aqp8a.1-/-	1.396	0.5356 to 2.256	Yes	***	0.0003	B-C
	9.869	1.854	4.524		Median	5.057	5.457	4.314
	3.819	4.994	9.13		75% Percentile	6.944	8.103	6.098		Test details	Mean 1	Mean 2	Mean Diff.	SE of diff.	n1	n2	t	DF
	4.684	4.362	1.692		Maximum	27.09	17.12	13.38		aqp1a.1+/+;aqp8a.1+/+ vs. aqp1a.1+/-;aqp8a.1+/-	5.881	6.208	-0.3272	0.2738	382	200	1.195	702
	3.619	4.014	1.412							aqp1a.1+/+;aqp8a.1+/+ vs. aqp1a.1-/-;aqp8a.1-/-	5.881	4.813	1.069	0.3252	382	123	3.286	702
	15.003	9.293	1.235		Mean	5.881	6.208	4.813		aqp1a.1+/-;aqp8a.1+/- vs. aqp1a.1-/-;aqp8a.1-/-	6.208	4.813	1.396	0.3594	200	123	3.884	702
	3.008	4.247	1.562		Std. Deviation	3.248	3.295	2.439
	12.016	2.864	4.314		Std. Error of Mean	0.1662	0.233	0.22		ANOVA results
	4.869	4.18	3.302							ANOVA summary
	6.565	5.291	8.055		Lower 95% CI	5.555	5.749	4.377		F	7.913
	4.214	3.527	4.467		Upper 95% CI	6.208	6.668	5.248		P value	0.0004
	3.905	1.657	5.448							P value summary	***
	9.095	1.629	2.159							Significant diff. among means (P < 0.05)?	Yes
	6.422	4.941	4.994							R squared	0.02205
	8.466	13.547	6.594
	6.977	10.322	6.306							Brown-Forsythe test
	3.456	3.259	5.291							F (DFn, DFd)	3.889 (2, 702)
	3.592	3.679	6.675							P value	0.0209
	5.254	2.915	4.934							P value summary	*
	6.525	5.966	11.051							Are SDs significantly different (P < 0.05)?	Yes
	8.143	5.444	4.599
	4.73	5.742	5.295							Bartlett's test
	2.996	2.933	1.864							Bartlett's statistic (corrected)	15.04
	3.685	6.704	1.737							P value	0.0005
	4.001	2.741	3.601							P value summary	***
	3.419	10.136	2.084							Are SDs significantly different (P < 0.05)?	Yes
	2.868	3.573	2.262
	3.816	2.717	3.553							ANOVA table	SS	DF	MS	F (DFn, DFd)	P value
	3.736	3.577	4.567							Treatment (between columns)	155.7	2	77.85	F (2, 702) = 7.913	P=0.0004
	4.225	7.122	2.825							Residual (within columns)	6906	702	9.838
	2.981	6.205	6.592							Total	7062	704
	3.371	8.515	6.374
	6.701	3.443	3.723							Data summary
	3.259	5.743	1.845							Number of treatments (columns)	3
	4.231	7.885	4.985							Number of values (total)	705
	3.4	5.25	2.451
	3.296	2.777	4.442
	5.242	2.891	1.6
	2.947	3.914	4.551
	4.101	5.206	3.295
	3.441	12.363	3.221
	8.603	3.022	2.21
	5.019	2.715	3.375
	10.473	11.718	2.285
	5.854	7.611	3.655
	5.44	3.171	4.286
	4.463	4.905	4.008
	3.842	11.151	5.634
	4.219	7.943	7.967
	3.995	4.286	5.669
	3.554	7.891	6.298
	4.156	7.367	3.468
	4.66	7.92	6.689
	2.622	5.918	4.275
	3.549	2.044	5.437
	5.831	2.907	5.071
	6.289	12.95	2.513
	2.661	15.938	1.962
	3.554	11.128	2.167
	3.259	9.967	4.22
	12.298	10.973	2.662
	5.056	8.624	2.915
	2.728	6.185	1.764
	6.876	3.537	1.953
	2.682	11.097	11.48
	6.756	3.462	7.789
	6.625	1.989	8.462
	3.058	10.863	4.149
	5.013	11.61	6.692
	4.237	5.486	4.225
	7.613	4.332	5.864
	3.586	13.741	3.768
	4.454	8.213	2.676
	3.01	2.915	5.133
	3.012	6.348	6.86
	8.738	3.051	1.816
	2.981	6.406	7.407
	5.058	5.444	2.618
	5.292	3.642	5.393
	6.612	2.231	4.199
	3.109	7.507	1.305
	6.117	2.326	7.974
	6.829	8.231	8.113
	10.034	6.531	6.623
	5.397	3.346	3.468
	3.083	9.975	3.902
	3.706	4.02	6.098
	6.632	3.529	6.127
	6.536	2.275	8.452
	7.408	14.072	13.375
	3.448	9.786	5.331
	6.099	9.614	3.883
	4.789	6.114	3.035
	2.529	2.044	3.443
	2.768	5.551	7.934
	2.741	4.97	5.641
	2.796	5.061	5.024
	10.284	4.125	3.927
	3.674	3.142	11.408
	8.674	12.121	9.569
	7.379	5.078	8.057
	7.409	11.768	4.022
	5.816	2.741	4.101
	8.928	5.915	3.68
	4.573	3.4	4.249
	3.733	4.653	5.306
	3.221	4.994	7.748
	5.542	3.924	3.188
	6.414	4.02	2.723
	2.501	3.158	3.943
	3.702	7.787	2.947
	2.715	3.586	5.325
	2.943	3.221	13.003
	3.323	3.455	6.078
	3.455	2.285	3.628
	2.645	6.612	3.515
	4.171	14.658	5.632
	3.761	14.11	4.286
	5.687	17.115	4.454
	5.229	6.101	5.242
	6.783	5.525
	8.733	6.398
	5.918	3.066
	3.728	3.906
	3.824	4.454
	5.506	8.156
	3.259	9.267
	6.375	4.962
	4.606	7.177
	2.957	2.989
	4.231	4.269
	6.233	10.84
	5.687	5.138
	5.417	8.826
	3.142	4.275
	3.402	3.468
	2.907	7.421
	4.734	8.31
	3.69	5.243
	6.504	4.017
	5.24	4.096
	3.549	2.191
	3.441	3.374
	7.731	7.383
	5.643	6.91
	5.577	10.436
	2.575	5.839
	2.584	9.772
	7.031	10.955
	4.969	3.909
	7.827	5.469
	10.832	6.058
	4.912	6.887
	6.764	5.899
	3.216	6.134
	9.07	6.551
	8.552	5.872
	6.886	9.275
	4.362	3.995
	4.469	6.939
	3.847	5.859
	5.008	12.395
	2.819	7.673
	5.149	7.296
	3.041	8.935
	3.201	4.637
	3.035	11.951
	4.797	8.281
	4.147	4.928
	4.199	5.276
	7.422	3.064
	2.728	3.257
	3.784	5.509
	2.835	4.371
	4.335	3.603
	3.542	9.941
	3.302	5.443
	10.997	11.999
	7.909	4.219
	9.417	5.536
	7.122	11.745
	4.313	8.705
	5.664	4.36
	4.972	4.797
	7.142	6.182
	2.529	3.012
	5.119	2.682
	2.567	16.096
	3.295	6.766
	2.927	12.237
	2.81	6.822
	3.149	8.197
	3.83	8.96
	6.548	3.163
	10.038	2.844
	2.683	3.48
	5.412	6.215
	2.813
	4.653
	2.812
	5.894
	5.309
	3.759
	4.845
	2.636
	3.713
	19.164
	8.899
	5.313
	8.757
	7.921
	4.39
	3.066
	4.898
	6.099
	4.72
	12.932
	8.24
	5.193
	4.919
	6.159
	5.205
	5.44
	3.035
	5.775
	3.279
	3.171
	4.014
	3.883
	6.228
	4.313
	4.772
	4.111
	5.702
	6.513
	4.875
	4.591
	3.358
	3.208
	3.346
	5.219
	2.62
	2.62
	5.38
	5.532
	4.247
	4.14
	5.935
	6.318
	4.786
	5.444
	2.501
	10.71
	5.544
	3.218
	4.594
	7.392
	7.715
	3.051
	6.623
	7.528
	5.95
	3.515
	4.231
	2.527
	4.7
	2.708
	2.825
	3.74
	9.555
	6.94
	6.68
	7.325
	8.538
	7.537
	8.559
	4.999
	8.71
	10.947
	19.333
	10.402
	5.007
	6.574
	7.436
	4.231
	4.675
	5.992
	6.808
	4.841
	6.846
	6.784
	6.03
	4.69
	7.297
	15.551
	6.536
	6.855
	5.434
	4.17
	4.045
	4.436
	3.058
	12.251
	16.092
	5.052
	3.098
	2.928
	7.324
	6.795
	14.94
	19.702
	6.786
	6.934
	7.159
	10.121
	6.354
	10.186
	8.059
	5.138
	6.942
	3.666
	8.738
	6.948
	4.912
	16.583
	11.821
	8.617
	4.536
	6.862
	13.617
	5.809
	10.682
	6.953
	4.682
	6.106
	6.996
	3.883
	11.121
	6.502
	12.495
	6.202
	19.704
	14.868
	16.399
	13.972
	7.125
	6.398
	7.604
	8.283
	5.918
	2.538
	3.081
	3.035
	27.086
	14.195
	6.997
	8.435
	7.788
	4.13
	3.941
	8.722
	8.76
	7.513
	5.1
	4.76
	10.502
	11.497
	5.633
	9.695
	5.457
	5.919
	9.69
	5.941
	3.279
	3.967
	3.252
	6.432
	7.279
	2.6

## Sheet: Figure 4J
	Figure 4 - Source Data 1
	Figure 4J: Rate of actin elongation (µm/s) (pool data from 2 independent experiments)
	aqp1a.1+/+aqp8a.1+/+	aqp1a.1-/-aqp8a.1-/-
	0.055	0.032		Unpaired t test
	0.047	0.05		P value	<0.0001
	0.045	0.021		P value summary	****
	0.045	0.03		Significantly different (P < 0.05)?	Yes
	0.064	0.02		One- or two-tailed P value?	Two-tailed
	0.031	0.035		t, df	t=9.803, df=94
	0.062	0.039
	0.04	0.017		How big is the difference?
	0.043	0.026		Mean of aqp1a.1+/+;aqp8a.1+/+	0.05436
	0.065	0.01		Mean of aqp1a.1-/-;aqp8a.1-/-	0.02833
	0.069	0.02		Difference between means (B - A) ± SEM	-0.02603 ± 0.002655
	0.072	0.01		95% confidence interval	-0.03131 to -0.02076
	0.056	0.033		R squared (eta squared)	0.5055
	0.058	0.017
	0.055	0.019		F test to compare variances
	0.051	0.035		F, DFn, Dfd	2.032, 52, 42
	0.066	0.017		P value	0.0192
	0.064	0.019		P value summary	*
	0.051	0.031		Significantly different (P < 0.05)?	Yes
	0.041	0.022
	0.045	0.03		Data analyzed
	0.052	0.024		Sample size, aqp1a.1+/+;aqp8a.1+/+	53
	0.065	0.046		Sample size, aqp1a.1-/-;aqp8a.1-/-	43
	0.046	0.025
	0.058	0.033
	0.038	0.026
	0.085	0.034
	0.066	0.052
	0.046	0.016
	0.079	0.021
	0.044	0.051
	0.052	0.026
	0.052	0.04
	0.041	0.026
	0.096	0.039
	0.054	0.039
	0.034	0.028
	0.054	0.037
	0.039	0.02
	0.044	0.03
	0.036	0.023
	0.038	0.021
	0.036	0.028
	0.041
	0.072
	0.049
	0.036
	0.076
	0.049
	0.068
	0.055
	0.089
	0.066

## Sheet: Figure 4K
	Figure 4 - Source Data 1
	Figure 4K: Cumulative tip cell leading edge displacement (µm).
	aqp1a.1+/-;aqp8a.1+/-
	Time, min	tip cell 1	tip cell 2	tip cell 3	tip cell 4	tip cell 5	tip cell 6	tip cell 7	tip cell 8	tip cell 9	tip cell 10	tip cell 11	tip cell 12	tip cell 13	tip cell 14	tip cell 15	tip cell 16	tip cell 17	tip cell 18	tip cell 19
	0	0	0	0	0	0	0	0	0	0	0	0	0	0	0	0	0	0	0	0
	7	1.322	-1.047	0.753	3.984	2.312	2.231	-0.064	-1.714	1.263	1.593	1.13	2.451	-0.624	1.191	2.72	1.755	-2.082	0.469	4.265
	14	1.272	-5.042	1.32	0.378	4.495	6.728	4.613	-0.276	-1.524	-0.812	3.167	0.982	-0.836	4.766	4.709	0.702	-1.771	3.664	3.336
	21	2.718	-5.202	0.199	5.13	12.099	11.56	4.136	0.289	2.376	9.226	6.672	9.619	-4.708	1.578	9.461	0.985	-1.57	3.31	2.861
	28	5.305	-2.715	2.679	5.394	12.881	17.881	0.541	0.123	1.859	4.402	6.576	10.055	0.038	3.633	9.071	2.419	-1.856	7.532	3.772
	35	4.534	3.007	2.778	6.032	19.639	24.303	0.365	0.17	4.059	1.482	1.811	9.085	-3.74	5.811	8.398	0.338	-2.76	8.614	3.263
	42	6.13	4.307	1.689	6.119	14.557	25.385	-0.938	1.311	4.66	1.865	2.888	12.288	1.749	6.083	10.7	0.756	-2.76	9.37	2.042
	49	8.545	4.815	4.225	6.151	23.12	26.683	-0.467	-0.227	4.879	2.716	5.311	9.711	3.437	7.841	12.928	2.198	-2.544	11.725	3.685
	56	8.923	5.526	3.306	4.703	28.928	27.096	2.903	1.558	7.242	2.834	6.647	11.235	0.851	7.684	15.128	2.764	-2.544	13.375	4.161
	63	10.041	10.467	3.776	9.44	32.871	29.007	1.757	0.037	4.826	3.223	7.698	10.429	6.982	7.239	16.009	1.116	-2.511	15.876	9.094
	70	8.966	10.467	6.876	10.94	34.974	28.876	1.905	-1.276	5.565	3.711	8.132	11.633	3.128	6.583	18.478	4.287	-2.315	13.083	10.704
	77	10.514	13.588	13.051	8.39	36.402	29.537	3.561	-0.552	7.087	2.872	8.823	12.242	4.679	5.097	21.473	4.896	-2.329	15.603	12.172
	84	13.406	13.142	11.246	8.39	33.637	29.505	5.292	0.55	7.244	3.574	11.571	15.21	5.145	3.599	20.935	5.429	-1.525	17.484	12.338
	91	12.327	10.148	11.792	12.561	33.459	30.828	6.406	1.75	9.95	3.479	11.224	18.831	5.189	3.722	21.481	12.768	-2.145	19.011	12.338
	98	12.809	12.024	9.927	14.481	37.751	34.285	9.482	0.828	16.836	4.481	10.083	19.772	5.478	6.042	21.545	8.864	-2.145	23.75	12.334
	105	14.554	13.98	9.927	18.283	40.012	36.09	8.753	0.833	16.001	10.932	15.945	22.867	5.39	2.002	23.739	9.086	-0.738	24.932	8.474
	112	13.882	13.98	15.355	19.883	42.029	37.255	7.851	0.068	16.655	10.758	17.685	20.729	4.895	4.235	25.475	5.808	-0.573	21.06	8.275
	119	17.391	15.464	23.183	21.639	43.742	38.014	6.343	1.203	19.554	7.558	18.141	24.563	4.718	8.561	26.274	8.499	1.656	24.762	9.664
	126	15.393	15.464	28.147	22.719	43.712	38.861	8.69	-0.075	18.658	9.107	22.585	28.627	4.615	9.92	22.272	11.954	-0.102	29.878	9.907
	133	18.419	15.464	33.613	28.91	42.194	41.486	10.349	1.635	16.616	13.494	29.72	33.976	6.69	11.866	25.601	7.048	-0.102	30.029	12.854
	140	21.212	14.75	38.302	32.321	44.616	44.223	13.047	0.867	17.438	16.642	37.594	31.633	4.946	17.541	27.204	8.307	-0.16	25.918	12.854
	147	21.983	20.142	39.989	37.917	43.373	41.305	14.907	2.665	19.079	10.295	33.774	29.445	18.372	20.981	30.242	11.342	1.855	28.722	13.69
	154	22.055	24.646	39.233	43.041	43.194	41.005	11.596	3.41	25.462	11.459	36.489	31.387	20.055	25.375	35.667	16.477	1.189	31.007	11.824
	161	25.867	29.486	39.487	46.782	42.65	39.9	12.172	3.18	26.962	13.355	44.334	35.075	22.278	35.006	38.231	13.297	1.189	31.354	9.066
	168	30.653	29.081	41.583	50.115	41.088	41.408	14.338	2.753	29.104	18.142	52.59	36.579	29.279	41.027	42.725	14.097	1.189	32.608	10.132
	175	33.395	32.885	42.91	49.135	42.453	41.813	17.344	1.799	33.106	21.066	51.693	38.951	30.401	42.881	44.824	18.298	0.228	31.009	7.371
	182	32.942	28.668	47.237	51.322	42.952	43.243	18.502	2.256	36.562	17.198	56.039	41.372	34.546	42.744	46.748	18.647	0.575	32.442	7.698
	189	34.196	31.504	51.365	52.743	44.088	43.669	25.439	8.152	37.667	18.697	63.081	45.203	34.638	47.136	50.507	12.302	1.5	35.518	7.627
	196	37.074	37.928	53.337	52.743	45.177	42.703	27.435	9.207	37.018	25.521	66.758	44.106	39.474	47.098	51.761	13.458	1.329	31.813	7.668
	203	37.735	44.594	53.337	52.743	45.79	42.46	28.759	10.286	41.867	35.197	66.32	46.952	42.715	47.432	53.29	12.502	9.798	32.564	10.548
	210	41.505	46.997	55.403	52.743	46.456	43.363	33.939	13.334	41.36	35.856	70.124	49.11	42.003	46.545	53.051	13.186	7.045	32.064	9.415
	217	46.79	52.843	55.403	52.743	46.162	42.615	32.844	19.762	40.991	39.724	70.621	48.623	44.827	47.111	52.034	16.831	7.045	32.956	8.835
	224	46.985	52.943	59.565	52.743	45.551	45.522	44.491	22.013	40.984	41.669	70.967	50.707	46.963	50.703	52.805	22.88	4.727	34.438	10.467
	231	49.055	52.964	59.565	52.743	47.633	45.153	44.782	30.14	42.624	45.604	71.252	51.668	47.441	47.571	50.913	26.572	11.37	35.229	14.796
	238	51.512	53.224	59.565	52.743	48.397	46.007	44.917	35.502	43.723	50.726	71.474	52.233	49.562	50.222	49.832	31.944	13.959	36.644	15.774
	245	54.39	54.394	59.565	52.743	48.397	45.193	47.714	37.983	43.723	54.148	73.719	54.517	49.655	49.733	49.747	34.493	17.16	38.089	20.712
	252	55.351	54.394	59.565	52.743	48.397	44.984	47.345	41.13	45.678	54.548	74.283	54.215	55.509	50.21	50.308	36.879	18.662	36.408	21.535
	259	55.092	57.118	59.565	52.743	48.397	44.901	47.033	46.624	45.199	56.646	71.159	54.653	58.082	51.514	51.56	40.615	21.948	37.604	27.074
	266	57.631	57.118	59.565	52.743	47.509	44.901	47.023	46.883	44.306	57.209	72.673	56.857	55.873	56.31	52.2	42.732	25.953	36.135	27.844
	273	57.631	57.118	59.565	52.743	47.151	46.198	47.361	53.955	47.46	59.461	72.145	60.668	55.55	56.851	48.212	48.111	34.651	40.601	36.352
	280	57.631	57.118	59.565	52.743	47.151	45.35	48.433	55.087	47.763	60.283	72.426	58.847	55.409	57.904	50.856	45.65	40.457	42.072	37.005
	287	57.631	57.118	59.565	52.743	47.151	46.074	51.395	55.113	47.763	60.524	71.84	58.872	59.732	54.488	51.02	46.912	41.803	43.62	39.476
	294	57.631	57.118	59.565	52.743	47.151	46.074	52.121	56.716	48.828	58.642	72.094	58.29	60.912	52.96	49.582	46.857	44.678	43.048	41.653
	aqp1a.1-/-;aqp8a.1-/-
	Time, min	tip cell 1	tip cell 2	tip cell 3	tip cell 4	tip cell 5	tip cell 6	tip cell 7	tip cell 8	tip cell 9	tip cell 10	tip cell 11	tip cell 12	tip cell 13	tip cell 14	tip cell 15	tip cell 16	tip cell 17	tip cell 18	tip cell 19	tip cell 20	tip cell 21	tip cell 22	tip cell 23	tip cell 24	tip cell 25	tip cell 26	tip cell 27	tip cell 28	tip cell 29	tip cell 30	tip cell 31	tip cell 32	tip cell 33	tip cell 34	tip cell 35	tip cell 36	tip cell 37	tip cell 38	tip cell 39	tip cell 40	tip cell 41	tip cell 42	tip cell 43	tip cell 44	tip cell 45	tip cell 46	tip cell 47
	0	0	0	0	0	0	0	0	0	0	0	0	0	0	0	0	0	0	0	0	0	0	0	0	0	0	0	0	0	0	0	0	0	0	0	0	0	0	0	0	0	0	0	0	0	0	0	0
	7	-2.652	4.745	-0.63	0.075	-0.573	-4.107	0.363	-0.385	2.899	2.106	4.814	-9.547	11.577	-3.032	1.734	5.028	0.493	0.816	0	0.658	2.838	2.197	-0.309	0.934	0	0	0	0.298	-0.193	1.368	-0.92	0.477	2.147	3.078	-0.37	0	1.78	7.168	1.453	-1.91	-0.558	-4.063	-0.179	-1.76	-2.503	0.304	-0.082
	14	-4.369	5.329	-3.654	-1.228	1.296	1.416	-0.08	5.312	3.976	1.158	7.699	-32.141	10.107	-5.789	0.44	14.762	-0.201	1.104	0.129	1.64	7.05	3.127	-6.739	-0.562	2.142	1.885	-0.321	1.154	-0.942	0.05	1.479	0.503	-1.364	5.589	-2.938	-0.614	1.379	8.663	-0.508	5.165	1.269	-5.651	-0.645	-1.61	8.694	0.304	2.108
	21	-6.88	8.549	-4.415	1.644	-0.671	0.107	-0.968	2.744	4.696	-0.891	9.777	-25.209	9.849	-6.279	-0.281	14.9	0.472	2.144	0.494	2.579	10.316	10.462	-8.495	-2.486	0.423	5.51	-0.321	2.576	-1.168	1.768	0.497	5.987	5.273	4.619	1.286	0.194	2.974	7.772	-0.348	5.752	1.079	-4.956	1.546	-2.968	10.852	6.834	4.075
	28	-8.842	6.713	-2.366	4.115	-0.788	-4.312	-3.881	0.298	3.134	-2.513	7.872	-4.491	10.94	-3.666	-1.93	14.425	0.472	3.056	1.071	3.733	12.176	13.779	-5.661	5.138	4.626	4.535	-0.321	0.375	-0.591	1.789	0.439	9.821	7.311	0.116	1.317	3.305	4.269	5.364	0.982	5.028	2.167	-3.697	5.375	-2.107	8.03	3.802	2.495
	35	-6.55	7.539	-5.064	2.311	3.457	-3.467	-0.503	-0.825	6.435	-2.513	10.403	-6.822	11.901	-2.68	2.452	10.906	0.472	3.464	1.648	4.645	14.115	15.411	-1.132	5.138	7.084	4.155	-1.458	0.859	2.172	1.813	-2.573	11.781	7.965	2.222	3.044	4.689	5.038	5.015	4.097	8.727	-0.67	-3.121	5.468	5.351	11.338	4.881	4.455
	42	-4.678	6.935	-6.422	1.284	1.11	1.373	-0.662	-1.71	7.575	0.932	9.951	-7.009	13.132	1.864	6.009	8.33	0.472	3.872	1.906	5.303	14.403	16.341	0.258	8.599	7.504	2.634	1.036	-0.506	3.072	5.378	1.499	17.862	10.554	-2.665	2.723	8.359	6.651	7.691	5.964	3.721	-1.601	2.511	7.875	7.545	17.543	4.881	3.296
	49	-2.649	11.588	-10.29	1.435	-0.969	3.252	3.417	2.753	7.892	-0.801	10.312	-5.644	13.132	1.028	6.276	8.274	1.219	3.872	1.906	6.464	14.935	18.072	3.465	8.114	9.78	4.73	4.205	-0.483	-1.377	0.32	4.492	19.029	12.857	-8.78	1.609	9.343	8.148	6.084	5.125	7.797	-1.601	3.939	8.323	6.955	20.8	9.134	1.44
	56	-0.73	8.015	-15.448	1.784	-0.501	7.554	6.514	3.921	7.892	0.641	11.487	-6.497	13.153	4.992	3.83	10.197	2.152	4.337	3.016	8.668	16.089	19.261	4.621	8.598	6.467	2.979	13.413	2.794	0.745	-1.773	6.293	21.333	13.743	-11.114	1.546	11.879	9.816	-0.966	5.846	8.041	-0.058	2.267	8.23	12.653	30.181	9.134	3.493
	63	-0.848	1.518	-15.674	7.244	7.552	9.277	11.644	4.416	7.892	5.779	16.27	-0.006	14.163	8.341	10.858	7.386	4.442	4.519	3.198	14.228	16.454	20.013	3.42	9.696	8.932	2.895	13.216	-0.22	1.199	1.625	7.614	23.807	16.009	-6.825	5.599	13.617	11.561	-2.175	5.18	9.805	-0.058	3.063	5.455	11.134	31.869	10.688	1.814
	70	0.891	-3.454	-17.761	4.126	3.441	9.349	13.113	4.104	6.146	8.259	17.303	7.86	14.652	11.99	6.963	3.177	4.442	4.807	3.198	19.14	16.862	21.665	4.614	8.569	9.048	3.87	17.919	3.14	3.779	1.785	8.55	29.376	17.622	-10.097	6.719	15.604	13.378	2.243	10.015	10.689	9.597	4.536	7.151	11.948	34.864	9.907	0.563
	77	2.604	-6.105	-15.922	5.974	5.791	10.819	13.527	2.582	9.156	8.259	17.934	3.34	14.998	13.646	5.788	3.215	4.442	5.065	3.198	21.824	18.539	23.362	3.622	9.902	9.388	3.384	23.097	7.027	3.809	1.771	8.989	29.952	22.965	-16.86	9.061	15.096	15.13	6.838	12.075	10.774	12.804	3.084	13.684	15.728	39.373	11.189	1.143
	84	5.179	-12.202	-17.585	4.174	12.677	14.762	15.032	5.087	9.453	12.685	17.934	5.326	14.337	14.545	4.755	-1.925	4.031	5.247	3.198	22.856	19.835	25.555	4.445	10.369	10.683	4.432	26.947	7.193	8.067	1.214	10.878	29.427	21.528	-16.86	10.504	15.766	18.145	8.606	9.332	16.763	16.056	6.916	14.899	14.506	46.085	12.751	3.249
	91	9.661	-12.55	-16.395	4.899	12.021	13.309	15.149	4.304	8.902	11.885	15.254	10.28	13.021	11.331	3.338	-1.723	4.928	5.634	3.327	23.786	20.123	26.587	5.273	9.026	10.202	7.927	27.734	6.878	9.594	1.98	10.878	29.474	7.188	-8.538	15.885	15.995	18.432	9.587	8.416	17.477	10.524	4.026	16.633	11.754	47.996	15.155	5.01
	98	9.628	-16.257	-10.733	0.085	13.264	12.813	14.251	3.606	11.887	11.885	16.272	10.644	14.058	8.686	7.769	-8.075	7.538	5.816	3.327	28.059	20.305	27.499	3.103	12.151	10.202	6.933	27.995	7.507	9.952	2.699	11.52	30.198	11.449	-6.118	19.179	17.717	19.9	13.93	7.561	21.511	1.506	5.928	20.312	19.136	48.494	25.222	5.708
	105	5.196	-14.201	-8.82	-0.646	11.641	15.773	15.516	6.799	10.821	10.431	15.906	9.594	13.031	10.954	7.769	-6.7	10.819	6.393	3.327	28.317	21.652	28.789	4.795	12.151	11.356	8.515	24.156	8.272	11.862	5.503	13.517	32.479	20.22	0.182	22.905	15.934	19.553	18.724	8.76	22.221	12.359	8.353	22.22	24.724	48.481	31.105	3.907
	112	4.105	-9.17	-5.759	2.924	12.958	15.511	14.976	4.885	13.847	13.48	13.709	13.49	13.723	12.245	6.22	-4.898	16.266	6.801	3.327	28.725	22.634	29.077	3.896	12.944	14.69	7.97	23.72	8.703	13.81	5.165	14.058	34.072	18.977	0.384	24.97	16.501	20.292	16.361	17.461	22.221	11.487	4.696	25.706	28.355	48.481	38.29	4.209
	119	8.747	-10.887	0.866	3.263	14.486	13.287	9.476	7.952	12.291	12.821	7.204	14.043	13.429	9.636	4.143	-0.743	22.617	7.166	3.327	28.854	23.099	29.829	9.107	12.944	17.198	8.904	26.043	8.238	12.06	6.357	15.648	33.677	23.256	-0.069	17.797	17.448	21.399	17.514	17.273	25.776	15.362	2.503	29.518	33.223	49.542	42.621	4.209
	126	9.639	-9.034	2.761	4.968	12.457	14.46	12.785	8.193	9.985	12.426	10.113	14.043	16.545	4.552	6.079	1.845	21.162	7.811	3.456	29.219	24.47	30.474	10.636	13.248	14.642	9.685	27.029	9.493	14.181	6.915	15.692	32.618	23.256	1.062	18.191	18.383	20.62	18.931	15.063	26.375	15.362	8.653	24.35	37.193	49.542	42.865	5.177
	133	10.926	-7.914	10.437	9.6	9.694	12.766	13.387	5.437	10.329	12.955	16.454	11.07	23.354	9.951	6.079	6.821	21.162	7.811	3.821	29.348	25.51	30.603	12.019	13.652	11.508	11.055	27.34	11.755	14.606	8.725	18.178	29.863	25.383	1.905	15.913	17.483	20.837	19.447	15.483	26.375	19.244	10.794	18.935	39.143	49.542	45.004	6.298
	140	10.637	-5.393	11.615	5.845	10.524	14.153	12.371	3.679	12.123	16.221	20.348	7.302	22.359	12.315	2.076	8.257	20.453	7.94	4.637	29.348	26.44	30.732	12.032	14.907	13.944	11.055	27.34	12.114	15.905	2.637	18.005	31.61	26.767	2.108	6.737	17.67	22.751	16.196	23.541	26.375	14.685	10.72	20.893	41.868	49.542	48.924	13.787
	147	10.039	-3.397	11.624	13.344	12.454	13.973	15.764	7.039	15.203	15.623	21.978	8.298	21.075	15.481	1.551	6.115	20.839	8.228	4.766	29.53	27.135	31.119	9.487	15.167	13.944	13.903	28.501	15.82	16.97	4.674	16.227	33.681	20.498	5.987	7.048	17.212	23.427	14.293	32.941	26.375	14.419	13.484	25.774	45.292	50.204	50.235	18.127
	154	9.649	-1.776	9.49	11.635	13.507	15.911	17.315	8.39	18.661	11.46	23.3	6.081	20.209	16.646	3.539	7.908	19.515	8.228	4.948	29.659	28.074	31.584	6.627	15.167	12.726	13.903	28.501	17.858	17.494	5.799	16.138	34.555	20.707	4.026	8.428	19.881	24.815	15.822	33.063	26.375	16.52	17.271	34.367	43.621	51.697	54.081	20.245
	161	16.162	1.96	8.821	12.679	12.682	17.838	17.848	8.962	17.293	19.235	24.382	2.898	21.251	16.761	4.325	7.498	21.653	9.524	5.077	29.659	28.482	31.992	4.346	16.296	15.289	12.22	31.338	23.687	18.131	5.806	17.166	35.942	25.1	6.5	7.951	21.115	36.663	18.221	28.848	26.375	17.398	21.875	36.648	45.852	52.447	57.259	17.652
	168	15.415	0.152	14.408	13.468	10.324	17.675	16.469	9.274	15.481	23.253	23.219	0.042	24.046	21.582	2.948	8.313	20.642	9.989	5.077	29.788	36.11	32.539	4.237	16.511	13.408	10.854	30.13	25.249	17.571	6.188	16.213	35.738	27.398	2.651	8.535	25.818	39.211	18.085	34.153	26.375	28.345	29.096	40.501	48.256	52.447	55.97	8.965
	175	14.543	4.321	19.925	15.811	9.301	17.682	16.12	8.672	16.868	27.181	21.23	4.772	30.971	24.639	3.212	11.785	24.097	10.277	5.259	29.788	38.129	32.947	5.65	16.511	12.473	11.045	30.864	26.653	21.336	5.159	16.577	36.65	26.301	8.328	7.402	25.545	50.898	15.985	36.913	26.375	39.978	33.02	45.822	48.256	52.447	56.876	-5.729
	182	24.116	2.487	20.307	14.999	8.249	18.184	16.114	6.887	14.496	35.309	21.158	13.637	25.338	28.698	5.847	11.849	22.188	10.685	5.836	29.788	38.258	33.463	9.585	14.822	12.195	8.783	28.754	29.259	20.763	6.169	16.577	36.657	27.845	2.902	14.221	27.642	54.229	14.948	41.544	26.375	42.94	39.935	48.485	48.256	53.261	56.876	-2.925
	189	26.705	2.27	28.956	12.133	7.097	20.261	16.305	4.454	14.847	38.918	23.598	8.057	23.526	31.987	7.297	8.192	22.188	11.33	5.836	29.788	39.01	33.751	9.73	14.745	13.513	7.851	27.868	31.802	19.382	10.798	17.789	37.896	28.325	1.928	18.186	28.838	59.391	14.85	45.174	26.375	48.443	39.173	52.467	48.256	53.93	62.082	3.288
	196	27.053	1.786	32.278	10.651	10.078	20.438	16.317	3.59	14.833	33.916	21.953	11.474	23.526	35.774	7.297	6.974	22.202	11.717	6.018	29.788	40.3	34.567	10.992	13.848	13.513	9.161	29.197	37.683	18.29	10.105	17.846	38.071	28.53	2.281	17.906	27.741	59.136	15.796	46.961	26.375	45.801	44.953	52.455	48.256	54.411	62.082	6.987
	203	26.754	-0.124	37.108	14.142	10.772	19.395	16.83	4.564	13.408	29.616	20.399	11.38	25.384	35.201	10.087	4.519	22.202	11.717	6.147	29.788	47.456	34.825	8.777	17.04	15.174	9.161	31.354	33.11	18.09	16.029	17.831	37.667	28.439	1.995	20.598	27.155	59.375	15.474	50.061	26.375	46.071	45.425	33.709	48.514	54.411	62.082	7.45
	210	13.046	1.111	38.497	14.46	11.517	19.889	17.77	4.925	12.345	27.278	18.971	11.38	25.457	36.854	4.947	4.285	20.678	11.846	7.155	29.917	51.652	35.47	8.777	14.172	12.984	9.161	30.884	38.382	17.394	19.32	18.273	37.667	27.983	0.902	20.994	29.562	60.166	19.354	51.05	26.375	43.991	46.028	43.281	48.514	54.411	62.56	9.746
	217	10.898	3.302	38.497	18.6	8.814	20.335	18.106	4.345	13.298	30.74	16.723	20.084	27.712	36.685	8.818	6.743	20.678	12.423	7.155	29.917	53.047	36.115	6.256	16.926	13.7	8.296	34.336	42.037	17.394	15.791	18.261	38.035	28.72	2.062	23.961	30.097	61.986	19.933	54.445	26.375	40.275	49.65	43.281	48.514	54.411	59.711	13.526
	224	13.462	1.343	38.497	19.893	10.779	22.84	18.67	5.619	15.415	37.12	14.572	19.656	25.931	36.761	12.886	5.592	24.502	12.955	7.155	29.917	53.977	36.647	5.295	16.505	12.338	10.193	33.795	43.839	18.352	13.978	18.336	38.035	30.848	5.568	30.016	30.052	61.624	24.782	54.445	26.375	44.106	51.405	51.436	54.057	53.973	61.976	21.541
	231	18.982	1.507	38.497	22.132	9.098	25.678	18.417	6.746	13.445	45.492	12.805	17.395	25.728	40.79	10.022	5.718	23.667	13.342	7.155	30.046	55.895	36.829	6.179	19.144	12.712	8.375	33.795	41.164	25.1	17.166	17.077	38.419	28.256	11.208	31.383	28.874	60.354	25.145	55.93	26.375	44.106	51.339	54.467	54.057	53.973	59.27	23.221
	238	17.176	1.263	38.497	21.207	9.903	25.537	19.236	7.076	13.147	51.698	20.537	14.938	23.715	41.38	13.21	5.643	22.979	13.63	7.155	30.454	57.8	37.361	5.55	20.303	12.712	10.676	31.691	42.255	23.653	17.284	17.295	38.419	28.678	11.924	36.21	29.835	60.218	25.755	55.93	26.375	49.073	51.339	58.743	54.833	54.171	60.524	31.849
	245	21.823	1.513	38.497	21.486	10.379	22.826	17.686	7.751	12.808	51.698	24.944	4.742	23.715	41.472	11.098	5.72	22.141	13.918	7.337	30.636	58.187	37.649	6.902	18.93	11.966	11.569	30.653	41.376	24.282	20.125	16.832	36.602	28.702	16.467	37.153	29.793	61.453	30.352	55.93	26.375	49.073	51.339	58.743	52.557	54.171	61.964	34.827
	252	22.511	2.994	38.497	20.952	12.639	23.858	19.767	9.707	14.08	46.538	24.822	5.932	22.434	41.194	11.417	3.562	22.141	14.206	7.519	30.636	58.445	37.649	7.013	17.626	11.966	11.569	30.653	42.794	22.782	21.447	15.943	36.514	28.878	17.545	39.859	33.209	60.935	31.3	55.93	26.375	52.699	51.339	58.743	52.557	54.171	60.867	39.17
	259	19.575	6.503	38.497	22.746	13.702	26.688	21.346	8.834	14.08	49.29	23.076	7.733	24.09	42.229	9.245	2.35	20.849	14.936	7.984	31.023	60.061	39.218	6.823	16.016	14.208	11.804	33.151	41.24	22.539	24.486	15.387	36.957	34.578	20.004	39.838	35.477	61.518	32.43	55.93	26.375	52.699	51.339	58.743	52.557	56.529	60.867	43.856
	266	22.561	7.507	38.497	22.088	9.681	28.261	21.45	10.864	18.361	49.29	19.775	10.558	25.04	41.256	10.966	2.66	20.849	14.936	8.679	31.205	60.991	39.626	5.872	16.016	13.933	11.133	31.377	41.745	20.709	25.607	16.526	37.568	34.893	23.426	40.807	42.147	61.999	35.606	55.93	26.375	56.075	49.609	56.771	52.557	56.529	60.867	48.107
	273	23.076	14.029	38.497	19.909	11.761	29.664	22.338	10.519	18.361	46.713	19.775	13.094	27.227	42.838	10.701	0.435	22.291	15.344	9.144	31.205	61.173	39.755	5.872	15.899	12.92	10.929	33.669	42.655	21.873	28.15	16.442	38.13	39.302	21.916	41.506	46.035	63.269	37.234	55.93	26.375	60.274	49.17	56.771	52.557	56.529	60.867	51.385
	280	20.15	18.661	38.497	16.301	9.034	29.596	22.64	8.747	19.174	46.713	19.852	8.875	26.718	45.284	12.374	0.367	22.325	15.344	9.609	31.205	61.173	39.755	6.527	15.899	11.181	10.652	33.002	42.992	20.634	27.926	16.462	38.902	37.567	20.009	42.672	53.26	64.19	44.877	55.93	26.375	60.274	49.17	60.029	52.557	57.574	60.867	55.19
	287	17.917	18.658	38.497	13.332	9.395	30.267	23.356	10.989	21.848	40.307	17.409	5.076	25.464	42.281	13.904	6.29	19.683	15.473	9.897	31.205	61.173	40.163	6.527	16.841	11.952	10.376	33.002	41.592	19.403	27.349	16.462	38.902	39.854	13.557	42.678	58.393	64.19	50.28	55.93	26.375	60.274	49.17	60.029	52.557	57.574	60.867	56.93
	294	16.868	19.895	38.497	16.506	6.615	29.203	23.039	11.246	20.398	37.579	16.373	9.89	24.71	41.482	17.641	11.547	19.683	15.602	10.284	31.205	61.302	40.292	6.527	16.858	12.072	10.509	33.002	41.592	20.192	27.965	15.585	39.095	41.597	13.557	49.626	60.627	64.19	58.601	55.93	26.375	58.818	49.17	60.029	52.557	57.574	60.867	59.013

## Sheet: Figure 4L
	Figure 4 - Source Data 1
	Figure 4L: Cumulative tip cell nuclei displacement (µm).
	aqp1a.1+/-;aqp8a.1+/-																						aqp1a.1-/-;aqp8a.1-/-
	Time, min	tip cell1	tip cell2	tip cell3	tip cell4	tip cell5	tip cell6	tip cell7	tip cell8	tip cell9	tip cell10	tip cell11	tip cell12	tip cell13	tip cell14	tip cell15	tip cell16	tip cell17	tip cell18	tip cell19	tip cell20		Time, min	tip cell 1	tip cell 2	tip cell 3	tip cell 4	tip cell 5	tip cell 6	tip cell 7	tip cell 8	tip cell 9	tip cell 10	tip cell 11	tip cell 12	tip cell 13	tip cell 14	tip cell 15	tip cell 16	tip cell 17	tip cell 18	tip cell 19	tip cell 20
	0	0	0	0	0	0	0	0	0	0	0	0	0	0	0	0	0	0	0	0	0		0	0	0	0	0	0	0	0	0	0	0	0	0	0	0	0	0	0	0	0	0
	6	0	3.386	0	0	0	0	0	0	0	0	0	0	0	0	0	0	0	0	0	0		6	0	0	0	0	0	0	0	0	0	0	0	0	0	0	0	0	0	0	0	0
	12	0	4.733	0	0	0	0	0	0	0	0	0	0	0	0	0	0	0	0	0	0		12	0	0	0	0	0	0	0	0	0	0	0	0	0	0	0	0	0	0	0	0
	18	0	6.122	0	0	0	0	0	0	0	0	0	0	0	0	0	0	0	0	0	0		18	0	0	0	0	0	0	0	0	0	0	0	0	0	0	0	0	0	0	0	0
	24	0.752	7.738	0	0	0	3.848	0	0	0	0	0	0	0	0	0	0	0	0	0	0		24	0	0	0	0	0	0	0	0	0	0	0	0	0	0	0	0	0	0	0	0
	30	1.41	8.026	4.327	0	0	4.256	0	0	0	0	0	0	0	0	0	0	0	0	0	0		30	0	0	0	0	0	0	0	0	0	0	0	0	0	0	0	0	0	0	0	0
	36	1.539	8.208	6.737	0	0	5.03	0	0	0	0	0	0	0	0	0	0	0	0	0	0		36	0	0	0	0	0	0	0	0	0	0	0	0	0	0	0	0	0	0	0	0
	42	1.827	11.512	8.241	1.969	0	6.599	0	0	0.865	0	0	0	0	0	0	0	1.296	0	0	0		42	0	0	0	0	0	0	0	0	0	0	0	0	0	0	0	0	0	0	0	0
	48	2.115	11.641	8.757	2.151	0	7.007	0	0	1.412	0	0	0	0	0	0	0	2.938	0	0	0		48	0	0	0	0	0	0	0	0	0	0	0	0	0	0	0	0	0	0	0	0
	54	2.373	12.751	9.797	3.368	0	7.189	0	0	2.394	0	0	0	0	0	0	0	3.346	0	0	0		54	0	0	0	0	0	0	0	0	0	0	0	0	0	0	0	0	0	0	0	0
	60	3.018	15.435	15.992	3.9	0	8.197	0	0	3.21	0	0	0	0	0	0	0	3.346	0	0	2.478		60	0	0	0	0	0	0	0	0	0	0	0	0	0	0	0	0	0	0	0	0
	66	4.179	16.83	16.174	4.908	0	8.892	0	0	4.72	0	0	0	0	0	0	0	4.386	0	0	3.381		66	0	0	0	0	0	0	0	0	0	0	0	0	0	0	0	0	0	0	0	0
	72	4.824	16.83	17.966	4.908	0	9.279	1.316	0	5.45	0	0	0	0	0	0	0	5.081	5.677	0	6.245		72	0	0	0	0	0	0	0	0	0	0	0	0	0	0	0	0	0.532	0	0	0
	78	6.171	17.76	19.598	5.734	0	10.191	7.157	0	5.837	0	0	0	0	0	0	0	5.726	9.581	0	7.573		78	0	0	0	0	0	0	0	0	0	0	0	0	0	0	0	1.11	1.358	0	0	0
	84	9.404	18.418	20.894	6.888	0	10.656	7.734	0	6.125	0	0	0	0	0	0	0	6.242	12.164	0	11.393		84	0	0	0	0	0	0	0	0	0	0	0	0	0	0	0	1.89	1.997	0	0	0
	90	15.117	20.07	22.062	7.07	0.658	11.43	9.455	0	6.951	0	0	0	0	0	0	0	6.424	12.572	0	11.97		90	0	0	0	0	0	0	0	0	0	0	0	0	0	0	0	2.669	2.635	0	0	0
	96	15.762	21.341	22.244	8.11	1.353	11.612	12.114	0	7.528	0	0	0	0	0	0	0	6.971	12.754	0	13.767		96	0	0	0	0	0	0	0	0	0	0	0	0	0	0	0	3.858	2.764	0	0	0
	102	18.134	22.253	23.461	13.536	2.335	11.87	17.955	0	8.44	0	0	0	0	0	0	0	7.1	13.943	0	14.935		102	0	0	0	0	0	0	0	0	0	0	0	0	0	0	0	5.433	5.132	0	0	0
	108	18.779	22.382	25.434	19.37	2.593	12.257	18.137	0	9.017	0	0	0	0	0	0	0	7.926	14.231	0	16.494		108	0	0	0	0	0	0	0	0	0	0	0	0	0	0	0	6.543	6.321	0	0	0
	114	19.968	23.208	26.544	21.067	3.17	13.761	18.714	0	12.767	0	0	0	2.899	0	0	0	8.291	15.057	0	21.473		114	0	0	0	0	0	0	0	0	0	0	0	0	0	0	0	7.008	6.609	0	0	0
	120	21.129	24.024	28.954	21.196	3.635	14.419	18.896	2.465	15.623	0	0	4.773	4.088	0	0	0	9.508	15.315	0	22.662		120	0	0	0	0	0	0.465	0	0	0	0	2.978	0	0	0	0	8.298	7.074	0	0	0
	126	22.419	30.201	29.531	21.604	6.372	15.331	19.722	5.457	16.939	0	0	5.431	6.553	0	0	0	10.855	21.235	0	24.393		126	0	0	0	0	0	1.217	0	0	0	0	3.244	0	0	0	0	8.946	8.901	0	0	0
	132	24.459	34.716	29.939	22.299	7.067	16.52	23.588	10.607	20.56	0	0	11.032	7.742	0	0	0	16.624	24.589	4.001	25.258		132	0	0	0	0	0	1.969	0	0	0	0	3.51	0	0	0	0	9.594	10.727	0	0	0
	138	24.867	35.232	30.197	23.523	8.878	17.165	25.845	17.706	24.195	0	0	12.829	8	0	0	0	18.996	26.673	5.472	28.028		138	0	0	0	0	0	2.614	0	0	0	0	3.875	0	0	0	0	11.098	12.302	0	0	0
	144	25.797	36.171	30.584	23.888	13.41	18.197	27.656	19.503	32.646	2.659	0	13.581	8.465	0	0	0	24.905	28.484	7.025	32.046		144	0	0	0	0	0	7.632	0	0	0	0	5.572	0	0	0	0	11.963	14.702	0	0	0
	150	26.262	36.353	30.766	24.533	13.818	20.204	28.408	25.014	34.199	4.699	0	15.716	10.692	0	0	0	25.421	29.855	8.065	33.893		150	0	0	0	0	0	8.164	0	0	0	0	6.862	0	0	0	0	13.065	16.161	0	0	0
	156	27.372	38.897	30.895	25.191	14.748	21.675	29.448	32.285	35.641	7.962	0	16.248	11.1	0	0	0	27.521	31.079	9.047	37.402		156	0	0	0	0	0	8.572	0	0	0	0	7.439	0	0	0	0	13.597	17.803	0	2.4	0
	162	28.526	39.026	31.26	25.656	15.213	22.864	29.913	36.65	36.393	8.607	0	17.817	14.609	0	4.863	0	28.179	32.498	10.442	39.32		162	0	0	0	0	0	8.701	0	0	0	0	7.847	0	0	0	0	13.597	18.843	0	3.058	0
	168	28.784	39.155	32.449	25.656	18.562	25.971	30.429	40.227	37.835	10.572	0	18.225	15.641	4.82	7.314	0	28.711	34.751	11.596	39.578		168	0	0	0	0	0	9.8	0	0	0	0	8.105	0	0	0.609	0	13.597	19.026	0	3.653	0
	174	29.072	39.413	32.707	26.121	18.562	27.54	31.461	40.872	38.367	11.682	0	20.372	17.151	8.045	10.539	0	29.928	37.216	12.508	41.389		174	0	0	0	0	0	10.898	0	0	0	0	8.363	0	0	1.217	0	13.597	19.208	0	4.247	0
	180	29.846	39.99	32.836	26.779	18.927	30.641	33.014	41.404	42.88	12.746	0	21.198	18.576	8.045	11.521	0	30.186	37.345	13.282	42.163		180	2.481	0	0	0	0	12.55	0	0	0	0	9.093	0	0	1.912	0	13.597	20.216	0	4.376	0
	186	29.975	40.522	33.244	27.553	19.743	31.83	33.53	42.558	43.062	14.299	0	21.585	19.041	9.085	12.892	0	32.512	37.345	14.392	42.345		186	3.013	0	0	0	0	14.397	0	0	0	1.395	9.919	0	0	3.383	0	14.637	20.681	0	5.192	0
	192	30.383	40.651	33.652	28.018	20.259	34.907	34.346	44.638	45.947	14.994	0	22.315	19.329	10.821	14.311	0	32.77	37.603	14.68	43.941		192	3.301	0	0	0	0	14.579	0	0	0	3.53	10.207	0.577	0	4.135	0	16.83	21.721	0	5.374	0
	198	31.209	41.436	34.347	28.018	20.667	35.454	34.991	45.283	46.859	15.282	0	23.141	19.974	10.821	15.137	4.2	33.596	38.15	14.968	46.138		198	3.766	0	0	0	0	18.193	0	0	0	4.107	14.189	1.222	0	5.303	0	17.088	23.225	0	7.377	0
	204	31.961	41.968	34.812	28.018	27.02	35.862	35.93	46.472	48.541	23.875	0	24.181	20.632	12.117	16.177	6.3	33.778	38.438	15.976	46.396		204	5.408	0	0	0	0	27.68	0	0	1.569	4.365	18.119	1.799	1.731	5.432	0	20.755	24.729	0	7.909	0
	210	32.09	41.968	35.1	28.018	28.209	37.333	38.014	48.39	51.082	26.254	0	25.349	21.327	12.762	16.465	7.524	34.066	38.846	17.894	46.654		210	5.59	0	0	0	0	27.824	0	0	1.934	6.418	18.263	1.89	1.875	6.044	0	20.82	25.514	0	8.619	0
	216	32.272	42.097	35.647	28.844	28.617	38.118	42.546	49.579	51.727	27.422	0	26.175	22.266	13.339	16.594	8.298	34.531	38.975	20.102	48.907		216	6.342	0	0	0	0	27.968	0	0	2.299	8.471	18.407	1.981	2.019	6.656	0	20.884	26.298	0	9.328	0
	222	32.454	42.226	35.829	29.574	29.194	39.408	45.669	50.611	52.837	28.611	0	27.522	22.961	14.528	17.141	9.21	35.755	39.983	23.773	50.366		222	6.342	0	0	0	0	30.824	0	0	2.428	8.879	18.872	3.702	3.615	10.117	0	22.924	28.095	0	9.973	0
	228	32.454	42.514	37.56	29.756	29.482	40.576	46.858	51.713	54.433	30.403	0	28.425	23.249	18.409	17.549	11.414	36.12	40.641	23.773	50.548		228	7.374	0	0	0	0	31.919	0	0	3.254	11.136	19.517	4.856	4.147	12.571	0	23.654	28.88	0	11.704	0
	234	33.27	42.514	40.169	29.885	29.611	41.558	48.148	52.408	55.01	31.061	0	28.833	23.826	18.667	18.244	12.761	36.585	41.681	24.755	51.364		234	8.563	0	0	0	0	32.451	3.559	2.04	3.831	13.105	19.925	5.682	4.512	13.345	0	25.451	29.288	0	12.349	0
	240	33.27	42.901	42.316	30.462	29.793	42.423	48.556	54.163	55.875	31.835	3.023	30.475	24.471	19.312	18.939	13.456	37.37	43.028	25.163	52.588		240	9.853	0.182	0	0.816	0	33.028	4.661	2.814	4.347	13.835	20.213	5.682	5.286	15.205	0	26.203	30.398	0	13.079	0
	246	34.055	42.901	42.445	31.12	30.488	43.647	49.021	54.571	56.422	32.48	4.063	30.604	25.41	20.344	19.724	13.988	37.886	44.036	25.163	53.904		246	11.014	0.311	0	0.998	0	33.958	5.487	3.459	4.879	14.093	20.6	6.229	5.544	15.493	0	27.835	31.688	0	13.544	0
	252	34.343	42.901	43.271	31.12	30.67	45.118	49.933	55.867	57.712	33.057	10.504	31.516	26.34	21.384	20.24	14.52	38.789	44.901	25.421	55.194		252	11.302	0.44	0	1.127	0	34.232	5.776	3.603	5.153	14.184	20.858	6.294	6.014	16.717	0	28.483	32.537	0	14.064	0
	258	35.095	44.29	45.104	31.408	31.217	45.903	50.398	56.619	58.866	34.935	14.759	32.161	26.805	21.672	20.772	17.129	39.884	45.03	25.937	57.099		258	11.879	0.698	0	1.309	0	34.505	6.064	3.747	5.426	14.275	21.116	6.358	6.483	17.941	0	29.131	33.385	0	14.584	0
	264	35.224	44.755	49.698	31.666	31.604	48.065	50.93	58.251	60.261	35.847	20.564	32.449	27.67	22.037	22.062	17.537	40.013	45.395	26.469	57.915		264	11.879	0.827	1.918	2.291	0	35.6	6.849	4.155	6.003	15.834	22.18	7.003	6.848	18.199	0	30.233	34.297	0	14.766	0
	270	35.589	44.884	53.747	31.954	32.069	49.129	51.715	59.468	63.125	37.064	20.951	33.026	28.455	23.353	22.992	18.353	40.195	45.803	26.757	59.205		270	12.167	0.956	3.487	2.291	0	35.888	9.053	4.337	7.011	19.402	23.22	9.022	7.888	19.015	0	34.585	37.801	0	14.948	0
	276	36.054	45.013	54.849	32.242	32.477	51.064	52.755	60.22	63.533	37.759	21.483	33.155	28.743	23.885	23.974	18.761	41.107	46.811	27.273	61.926		276	12.167	1.651	5.32	2.868	0	36.07	11.018	5.089	7.476	21.564	23.402	10.674	8.176	20.692	0	37.364	40.432	0	14.948	0
	282	37.901	45.142	55.426	32.774	32.864	53.199	53.332	60.767	64.958	38.124	22.7	33.443	28.872	24.293	24.262	19.456	42.171	47.75	27.918	64.776		282	13.097	2.016	6.824	3.62	0	36.199	13.021	6.019	8.753	22.38	23.531	11.99	8.641	23.577	0	38.474	40.72	0	14.948	0
	288	41.662	45.4	56.408	33.062	33.046	54.111	53.99	62.038	65.216	39.677	24.028	34.088	29.775	24.951	25.036	20.23	42.429	48.502	28.434	67.561		288	14.105	3.08	7.576	3.749	0	36.487	14.776	7.059	10.124	23.206	24.078	13.415	9.743	25.913	0	39.29	41.546	0	16.102	0
	294	42.357	47.726	57.736	33.244	33.334	54.756	54.775	63.078	66.405	41.23	24.415	34.453	30.162	25.209	25.501	20.595	43.531	49.147	28.821	67.849		294	15.207	3.488	10.495	4.037	0	36.681	15.152	7.348	10.318	23.464	24.311	13.97	9.976	26.665	0	40.064	41.75	0	16.102	0
	300	42.645	48.456	60.497	33.244	33.592	55.796	55.591	63.723	67.507	42.419	25.2	34.582	30.807	25.786	26.44	21.003	44.47	49.679	29.398	68.031		300	15.615	4.146	12.434	4.219	0	36.874	15.528	7.636	10.511	23.722	24.543	14.525	10.208	27.417	0	40.838	41.954	0	16.102	0
	306	43.29	49.151	63.258	33.502	33.592	56.836	56.138	64.381	68.602	43.149	26.065	34.84	31.384	25.786	26.987	21.915	45.572	50.743	29.763	71.32		306	17.184	4.804	12.899	4.219	0	37.056	17.85	8.462	11.782	24.661	24.801	15.31	10.208	29.277	0	41.768	41.954	0	16.102	0.73
	312	43.29	49.151	66.7	33.502	33.592	57.748	57.434	65.852	69.514	43.514	27.871	35.372	31.771	26.173	27.564	22.955	46.357	51.438	29.763	74.176		312	17.184	4.933	13.939	4.401	0	37.185	18.032	9.365	12.247	25.306	25.531	15.31	10.616	29.793	0	42.594	43.787	0	16.887	1.195
	318	43.935	51.448	70.443	33.631	33.774	58.651	58.658	66.604	70.426	44.426	28.258	36.649	32.287	27.397	27.746	23.084	47.685	52.627	30.051	74.821		318	17.571	5.221	15.745	4.401	0	37.314	20.354	10.519	13.287	25.594	26.063	15.887	10.798	30.609	0	42.882	44.075	0.288	17.545	1.66
	324	44.593	52.36	73.013	33.919	33.774	59.436	59.523	67.534	71.121	44.714	29.426	36.831	32.932	27.526	28.034	23.213	47.814	53.014	30.339	75.551		324	17.859	5.686	16.519	4.659	0	38.661	21.106	10.701	15.134	26.126	26.708	16.252	11.55	31.141	0	44.324	45.014	2.541	18.873	2.762
	330	45.058	52.907	74.36	34.048	34.182	60.094	59.811	67.899	71.895	45.816	32.404	37.296	34.203	28.073	28.679	23.395	48.566	53.272	30.886	76.993		330	17.859	6.218	17.304	4.841	0	40.008	21.235	11.89	15.499	26.771	27.173	17.078	11.958	31.799	0	44.324	45.014	2.906	19.161	3.227
	336	45.346	53.681	75.342	34.23	34.182	61.663	60.714	68.476	72.54	46.755	33.412	37.704	34.491	28.073	29.495	23.683	48.824	53.272	31.273	77.809		336	19.33	6.218	18.575	4.841	0	40.152	21.3	13.136	15.955	27.184	27.173	17.491	12.57	32.411	0	45.101	45.014	3.299	19.161	3.679
	342	46.285	53.969	75.342	34.412	34.182	62.566	61.816	70.282	73.325	47.163	34.476	37.962	35.023	28.768	29.86	24.468	49.189	54.202	31.561	78.849		342	20.115	6.4	19.639	5.228	0	40.296	21.364	14.381	16.411	27.597	27.173	17.904	13.182	33.023	0	45.877	45.014	3.691	19.161	4.13
	348	49.424	53.969	75.63	35.057	34.569	63.143	62.224	70.647	74.941	48.102	35.804	38.25	35.6	29.176	30.247	25.113	50.054	54.847	31.69	79.494		348	21.431	6.977	19.821	5.98	0	40.704	23.333	14.563	16.699	28.242	27.173	18.162	13.877	33.431	0	49.194	46.291	4.223	19.161	5.17
	354	57.975	54.257	77.307	35.186	34.977	64.585	63.385	71.305	76.573	48.634	36.62	38.508	36.132	29.358	30.942	25.843	50.054	55.255	31.948	81.291		354	21.689	6.977	21.192	6.162	0	41.112	25.064	24.261	18.926	28.5	27.173	19.272	14.006	33.613	0	51.005	49.924	5.44	19.161	6.589
	360	60.919	54.439	77.965	36.098	35.159	65.98	65.067	72.369	77.613	49.546	38.444	38.796	36.664	29.487	31.329	26.375	50.519	55.255	32.887	82.203		360	22.628	7.342	21.837	7.202	0	41.241	25.472	25.814	19.055	28.865	27.818	19.454	14.988	33.978	0	52.574	50.053	5.44	19.693	7.653
	366	64.487	54.621	79.236	36.28	35.341	66.732	65.712	73.154	78.308	50.276	39.26	38.978	37.359	29.775	32.439	26.557	51.335	56.68	33.997	85.302		366	23.796	7.889	26.037	9.886	0	42.067	26.8	27.256	19.571	29.047	32.796	19.742	17.635	34.51	2.561	54.256	50.053	5.569	19.693	7.653
	372	65.929	54.879	80.062	36.409	35.341	67.264	66.37	73.939	78.824	50.853	41.34	39.636	37.647	29.904	32.804	26.686	51.993	56.938	34.362	86.342		372	25.143	12.898	27.019	10.174	0	42.067	27.332	28.072	20.036	29.512	32.796	21.246	17.923	34.51	3.077	55.296	53.407	5.569	19.693	8.438
	378	67.371	56.531	80.35	36.667	35.341	67.909	67.155	74.851	79.371	51.638	42.252	40.001	38.112	30.269	33.212	27.344	52.819	57.583	34.544	86.471		378	25.608	19.048	27.714	10.721	0	42.25	27.68	28.137	20.18	29.577	32.887	21.569	18.532	34.923	3.142	55.619	53.407	5.634	19.758	8.438
	384	69.439	56.531	80.479	36.796	35.599	69.715	68.344	75.496	80.029	51.767	43.234	40.259	38.4	30.785	33.857	28.533	53.604	58.623	34.952	88.113		384	26.016	19.564	28.179	11.009	0	42.432	28.027	28.201	20.324	29.641	32.978	21.891	19.14	35.336	3.206	55.941	53.407	5.698	19.822	8.438
	390	72.032	56.996	80.479	37.526	35.599	70.467	69.672	76.012	81.471	52.583	44.336	40.441	38.765	31.193	34.787	29.687	53.733	58.881	35.468	89.095		390	26.593	19.746	29.091	11.138	0	42.979	28.209	29.754	21.019	30.188	33.843	23.316	20.876	36.889	4.145	56.981	53.536	6.163	19.822	8.846
	396	74.602	58.385	80.887	37.526	35.728	72.036	70.137	76.67	83.226	52.765	44.594	40.988	39.053	31.658	35.364	31.262	55.128	59.539	36.253	89.383		396	26.851	20.211	29.786	11.32	0	43.344	30.406	30.141	21.535	30.553	34.131	23.604	21.702	37.354	5.461	56.981	55.111	6.628	19.822	8.846
	402	75.77	58.567	82.642	37.934	36.631	72.444	71.291	77.838	84.394	53.517	46.315	41.633	39.182	32.698	36.022	33.346	55.913	60.234	36.661	90.199		402	27.546	20.211	30.85	12.105	0	43.473	31.064	31.181	22.351	31.198	34.26	24.249	22.454	37.999	5.461	56.981	55.896	6.757	20.08	9.598
	408	78.836	59.225	83.416	38.063	37.663	73.356	72.762	78.741	84.682	54.302	46.831	42.02	39.364	32.88	36.68	34.856	56.608	60.766	36.843	91.015		408	27.834	20.469	32.89	12.492	0	44.385	32.568	34.258	22.996	34.176	35.655	25.644	22.862	37.999	7.366	56.981	57.936	6.757	20.338	10.372
	414	81.814	60.729	83.948	38.192	38.128	73.872	73.294	79.909	85.621	54.302	47.476	43.391	40.518	33.745	37.465	35.388	57.185	61.92	37.375	92.95		414	28.221	20.598	33.675	12.857	0	44.385	34.36	34.44	23.512	35.041	36.932	26.16	23.15	39.216	8.941	56.981	59.09	6.757	20.725	10.63
	420	83.318	68.588	84.413	38.192	42.16	74.53	74.396	80.567	87.721	55.118	48.341	44.176	40.7	34.322	37.753	35.676	57.314	63.109	37.504	93.595		420	28.686	20.78	33.963	13.722	0	44.529	36.524	35.17	24.157	35.307	37.255	26.251	23.279	40.175	9.264	56.981	59.438	6.757	20.869	10.824
	426	84.646	74.208	85.108	38.45	45.18	75.469	75.308	81.083	90.199	56.335	48.918	44.95	41.216	34.61	38.285	36.615	57.779	64.012	37.686	94.784		426	28.686	23.644	35.881	14.187	0	44.673	38.687	35.899	24.802	35.573	37.577	26.342	23.408	41.134	9.586	56.981	59.785	6.757	21.013	11.017
	432	85.376	74.496	86.14	38.45	46.622	76.372	75.966	81.868	90.487	56.993	49.83	45.862	42.042	35.475	39.197	37.4	58.437	64.3	37.815	95.429		432	28.974	31.007	37.252	14.917	0	44.802	42.356	37.37	25.21	36.992	41.175	32.834	24.193	42.174	10.451	56.981	61.289	6.886	21.142	11.199
	438	85.376	74.961	86.505	39.027	46.751	77.284	76.831	82.513	92.056	57.401	50.217	46.647	42.171	35.657	40.994	37.688	58.619	64.765	38.347	96.087		438	29.748	35.529	37.51	15.562	0	45.732	43.646	38.015	25.984	37.744	42.986	35.571	24.725	42.303	10.58	56.981	63.542	7.068	21.674	11.857
	444	86.192	75.493	86.687	39.414	46.88	78.348	77.119	82.921	92.588	58.331	50.749	46.829	42.636	36.044	43.428	37.946	59.264	64.894	38.605	96.452		444	30.113	37.039	38.042	15.927	0	46.197	44.576	39.667	26.449	39.06	47.146	36.266	25.879	42.88	10.945	57.797	63.542	7.068	21.932	11.986
	450	87.409	75.622	86.687	39.414	49.069	79.388	77.814	84.192	93.246	59.371	51.136	47.893	43.101	36.173	44.436	39.274	60.08	65.833	39.137	97.029		450	30.5	38.592	38.558	19.56	0	46.584	49.585	40.132	27.144	39.592	50.116	37.196	27.047	42.88	12.273	57.797	64.838	7.068	21.932	12.244
	456	88.598	77.482	86.869	39.543	49.069	79.796	78.201	84.944	94.862	60.842	52.066	48.28	43.678	36.56	44.968	39.739	60.338	67.68	39.425	97.437		456	30.965	39.408	39.905	22.596	0	46.778	50.401	40.223	27.857	40.147	51.293	38.581	27.602	42.88	12.596	58.21	65.858	7.159	21.997	12.954
	462	88.598	78.986	87.051	40.238	49.251	81.924	80.301	85.202	95.507	63.333	52.474	48.462	44.21	37.137	45.613	40.104	60.626	68.72	39.713	97.824		462	31.373	39.537	41.324	23.785	0	46.971	51.217	40.314	28.569	40.702	52.47	39.966	28.157	42.88	12.918	58.623	66.878	7.25	22.061	13.663
	468	88.598	79.451	88.212	40.883	49.638	82.289	80.43	86.132	96.949	65.56	53.132	49.444	44.597	37.425	46.365	40.469	61.356	69.659	40.745	98.356		468	31.738	40.182	41.732	26.012	0	47.487	53.152	41.409	29.116	41.454	55.126	41.337	30.304	43.665	13.45	58.623	67.007	8.115	22.349	13.663
	474	88.727	80.728	88.47	41.141	49.82	83.714	82.222	87.044	97.734	67.129	54.071	50.26	45.113	37.941	47.582	40.651	61.356	70.304	41.21	99.388		474	32.203	40.44	42.377	26.3	0.774	47.775	53.729	42.598	29.632	43.106	56.521	43.34	32.963	44.073	13.708	58.805	67.584	8.115	22.531	14.308
	480	89.192	82.303	88.47	41.27	50.605	85.267	83.647	87.702	98.266	68.419	54.479	50.905	45.478	38.349	49.908	41.761	63.234	70.999	41.339	99.853		480	32.78	40.44	43.193	27.239	0.903	48.063	54.306	44.069	30.856	44.201	58.276	44.205	34.152	44.438	14.366	58.934	67.584	8.115	22.713	14.855
	486	89.192	87.727	88.599	41.678	50.893	86.709	85.453	88.87	99.178	68.601	55.769	51.313	45.607	39.538	54.527	42.338	64.274	72.101	41.871	100.24		486	33.606	40.44	43.481	28.393	1.368	48.45	55.854	45.766	30.985	45.517	62.92	44.85	36.524	45.606	15.269	59.222	68.242	8.244	22.895	15.242
	492	89.48	91.083	90.152	42.255	51.181	87.717	85.861	89.565	100.043	69.929	56.585	51.958	46.154	39.72	61.316	42.596	65.564	72.389	42.159	100.648		492	34.014	40.44	44.126	29.323	2.463	49.095	57.144	46.298	31.643	46.064	64.473	46.292	38.463	46.138	15.557	61.713	68.887	8.426	23.077	15.424
	498	89.867	95.123	90.334	42.62	51.363	88.533	86.677	90.097	101.083	70.394	56.714	52.323	46.412	41.544	63.194	42.778	66.718	72.677	42.524	100.777		498	34.196	40.805	45.28	30.363	3.402	49.289	57.609	47.251	31.909	46.193	64.739	46.725	38.983	46.267	15.815	62.787	69.736	9.021	23.735	16.198
	504	91.238	98.487	90.463	43.167	52.137	89.318	87.407	91.666	102.399	70.781	56.972	52.839	46.412	42.202	64.704	43.53	67.758	74.005	42.782	101.185		504	34.325	40.987	45.28	30.363	5.123	49.482	58.074	48.203	32.175	46.322	65.005	47.157	39.503	46.396	16.073	63.86	70.584	9.615	24.393	16.972
	510	91.367	98.775	90.592	46.761	52.669	90.76	87.815	92.605	104.096	71.069	57.875	53.127	46.541	42.384	65.489	43.788	68.046	76.546	43.19	101.593		510	34.613	41.632	45.462	30.771	5.655	49.664	59.643	48.955	32.905	48.604	66.91	48.661	39.791	47.054	16.538	64.612	70.872	9.744	24.522	16.972
	516	91.367	99.42	90.592	46.89	54.4	91.225	88.879	93.07	107.617	72.488	58.34	53.309	47.357	42.916	66.878	44.253	69.642	79.09	43.975	102.001		516	34.795	41.761	45.87	30.953	6.407	50.029	60.469	50.251	33.482	48.892	68.071	50.214	41.615	47.699	16.826	64.612	71.657	10.439	24.987	16.972
	522	92.27	100.402	90.774	47.019	56.369	92.051	91.007	93.457	110.187	73.496	59.501	54.239	48.546	43.98	67.243	45.165	84.58	82.525	44.233	102.409		522	35.083	41.943	47.141	30.953	6.939	50.317	60.598	50.509	33.664	49.3	70.443	51.542	42.647	48.344	17.691	64.612	72.522	12.286	25.116	17.26
	528	93.947	101.384	90.774	47.148	56.498	92.438	93.719	93.844	113.179	74.141	59.63	55.334	48.954	45.012	67.708	45.981	85.51	83.565	44.749	102.874		528	35.341	42.351	48.044	31.211	7.121	50.575	61.537	52.264	34.18	50.074	71.373	52.119	42.935	49.976	18.786	65.159	72.522	13.35	25.116	17.26
	534	93.947	101.513	90.774	47.556	61.924	93.754	98.983	94.66	114.469	74.786	60.095	56.15	49.486	45.764	68.573	47.491	87.063	87.361	44.931	103.976		534	35.47	43.281	48.576	31.727	7.409	50.704	61.795	52.522	34.825	50.651	71.76	53.049	44.612	51.697	19.074	65.159	73.812	14.452	25.116	17.26
	"0" means that nucleus is in the dorsal aorta.

## Sheet: Figure 4M
	Figure 4 - Source Data 1
	Figure 4M: Average tip cell velocity (µm/min).
	aqp1a.1+/-aqp8a.1+/-	aqp1a.1-/-aqp8a.1-/-
	0.279	0.057		Unpaired t test
	0.217	0.206		P value	<0.0001
	0.221	0.229		P value summary	****
	0.266	0.199		Significantly different (P < 0.05)?	Yes
	0.202	0.242		One- or two-tailed P value?	Two-tailed
	0.187	0.211		t, df	t=5.776, df=64
	0.207	0.067
	0.225	0.183		How big is the difference?
	0.194	0.056		Mean of aqp1a.1+/-;aqp8a.1+/-	0.2156
	0.233	0.022		Mean of aqp1a.1-/-;aqp8a.1-/-	0.117
	0.286	0.099		Difference between means (B - A) ± SEM	-0.09856 ± 0.01706
	0.171	0.078		95% confidence interval	-0.1326 to -0.06447
	0.165	0.038		R squared (eta squared)	0.3426
	0.186	0.2
	0.231	0.18		F test to compare variances
	0.242	0.214		F, DFn, Dfd	4.154, 46, 18
	0.21	0.215		P value	0.0018
	0.197	0.206		P value summary	**
	0.177	0.069		Significantly different (P < 0.05)?	Yes
		0.128
		0.056		Data analyzed
		0.034		Sample size, aqp1a.1+/-;aqp8a.1+/-	19
		0.084		Sample size, aqp1a.1-/-;aqp8a.1-/-	47
		0.141
		0.06
		0.039
		0.242
		0.201
		0.067
		0.053
		0.035
		0.117
		0.209
		0.137
		0.023
		0.057
		0.041
		0.036
		0.118
		0.144
		0.069
		0.095
		0.053
		0.133
		0.141
		0.047
		0.169
