# Supplementary material for: Combined forces of hydrostatic pressure and actin polymerization drive endothelial tip cell migration and sprouting angiogenesis
Source: eLife. 2025 Feb 20;13:RP98612. doi: 10.7554/eLife.98612 (PMC11841990; doi:10.7554/eLife.98612)
Supplement: Figure 5—source data 1. [file elife-98612-fig5-data1.xlsx]

## Sheet: Figure 5D
	Figure 5 - Source Data 1
	Figure 5D: Volume of isosurface (µm^3) of tip cells.
	wildtype	aqp1a.1-/- aqp8a.1-/-	aqp1a.1 OE			wildtype	aqp1a.1-/- aqp8a.1-/-	aqp1a.1 OE		Multiple comparisons
	1105.2	1129.08	923.85		Number of values	24	20	32		Dunnett's T3 multiple comparisons test	Mean Diff.	95.00% CI of diff.	Below threshold?	Summary	Adjusted P Value
	881.36	500.1	925.13							wildtype vs. aqp1a.1;aqp8a.1	254.8	41.32 to 468.3	Yes	*	0.015
	894.14	808.8	2171.79		Minimum	554.8	155.3	629.7		wildtype vs. aqp1a.1 OE	-348.7	-616.3 to -81.09	Yes	**	0.0069
	747.82	1182.69	971.9		25% Percentile	755.4	496.9	924.2		aqp1a.1;aqp8a.1 vs. aqp1a.1 OE	-603.5	-884.8 to -322.2	Yes	****	<0.0001
	913.23	763.13	706.39		Median	929.5	786	1139
	582.34	233.19	890.15		75% Percentile	1112	895.3	1612		Test details	Mean 1	Mean 2	Mean Diff.	SE of diff.	n1	n2	t	DF
	678.61	866.71	1071.12		Maximum	1604	1183	2743		wildtype vs. aqp1a.1;aqp8a.1	964.6	709.8	254.8	85.72	24	20	2.972	39.17
	554.75	952.71	885.72							wildttype vs. aqp1a.1 OE	964.6	1313	-348.7	108.3	24	32	3.219	48.49
	778.1	1102.35	803.42		Mean	964.6	709.8	1313		aqp1a.1;aqp8a.1 vs. aqp1a.1 OE	709.8	1313	-603.5	114	20	32	5.293	49.5
	1052.76	887.72	1172.59		Std. Deviation	270.2	293.5	527.4
	907.45	495.79	1395.27		Std. Error of Mean	55.15	65.63	93.23
	1451.98	827.7	1085.69							ANOVA results
	639.85	598.54	1009.19		Lower 95% CI	850.5	572.4	1123		Brown-Forsythe ANOVA test
	971.95	819.19	989.49		Upper 95% CI	1079	847.1	1503		F* (DFn, DFd)	17.15 (2.000, 65.10)
	1371.68	346.89	1209.46							P value	<0.0001
	1015.23	682.49	647.49							P value summary	****
	945.78	897.81	2015.6							Significant diff. among means (P < 0.05)?	Yes
	1114.77	551.04	1381.58
	889.91	155.31	2025.59							Welch's ANOVA test
	1145.87	394.41	1404.62							W (DFn, DFd)	14.06 (2.000, 47.31)
	1257.41		629.68							P value	<0.0001
	976.97		886.87							P value summary	****
	668.13		1039.04							Significant diff. among means (P < 0.05)?	Yes
	1604.49		1247.61
			1551.45							Data summary
			2743.37							Number of treatments (columns)	3
			2001.65							Number of values (total)	76
			1853.62
			1105.24
			1370.4
			1632.14
			2277.38
	Note
	Each value corresponds to a single tip cell.
