# Supplementary material for: Combined forces of hydrostatic pressure and actin polymerization drive endothelial tip cell migration and sprouting angiogenesis
Source: eLife. 2025 Feb 20;13:RP98612. doi: 10.7554/eLife.98612 (PMC11841990; doi:10.7554/eLife.98612)
Supplement: Figure 6—source data 1. [file elife-98612-fig6-data1.xlsx]

## Sheet: Figure 6H
	Figure 6 - Source Data 1
	Figure 6H: ISV length (µm) at 26 hpf (pool data from 2 independent experiments).
	Control	DCPIB
	76.547	62.883		Unpaired t test
	66.452	74.375		P value	<0.0001
	62.967	71.916		P value summary	****
	75.822	60.477		Significantly different (P < 0.05)?	Yes
	65.686	58.55		One- or two-tailed P value?	Two-tailed
	101.207	54.112		t, df	t=13.34, df=284
	65.076	94.47
	77.447	54.312		How big is the difference?
	97.218	52.319		Mean of control	90.65
	96.316	57.818		Mean of DCPIB-treated	62.98
	66.084	77.868		Difference between means (B - A) ± SEM	-27.68 ± 2.075
	102.606	52.495		95% confidence interval	-31.76 to -23.59
	103.45	56.181		R squared (eta squared)	0.385
	102.469	97.27
	94.045	59.128		F test to compare variances
	98.738	72.145		F, DFn, Dfd	1.203, 152, 132
	93.447	61.19		P value	0.276
	49.054	58.453		P value summary	ns
	118.632	56.95		Significantly different (P < 0.05)?	No
	104.398	53.663
	60.389	60		Data analyzed
	105.174	64.353		Sample size, control	133
	80.828	56.875		Sample size, DCPIB-treated	153
	88.46	50.343
	72.465	51.658
	112.155	48.695
	113.47	71.434
	59.07	69.053
	105.172	59.804
	107.15	56.553
	80.956	55.646
	72.866	64.464
	101.517	51.106
	60.595	68.526
	66.402	61.663
	73.868	62.302
	83.566	56.88
	94.733	56.157
	71.101	101.166
	110.524	67.067
	79.513	56.927
	103.204	58.431
	103.582	51.166
	87.632	54.452
	59.113	53.454
	109.432	75.083
	72.687	69.704
	107.925	56.23
	108.486	63.26
	94.371	69.409
	100.244	57.73
	59.366	105.431
	65.659	89.5
	48.076	107.857
	92.439	72.589
	101.189	71.596
	106.878	81.977
	106.86	80.172
	100.874	73.979
	102.32	57.697
	100.542	50.731
	85.757	60.757
	87.74	113.535
	83.491	83.984
	67.536	107.878
	65.393	67.86
	110.07	67.916
	98.789	54.372
	105.436	57.484
	102.401	23.179
	89.504	99.349
	106.479	82.867
	87.818	71.012
	82.497	56.876
	109.304	53.14
	109.949	58.61
	103.626	43.963
	105.997	20.517
	108.362	28.405
	105.827	22.464
	108.291	63.673
	65.499	60.131
	92.817	66.687
	68.168	65.13
	96.812	56.011
	85.175	53.424
	102.146	44.288
	94.002	54.892
	60.027	19.534
	59.335	49.369
	87.364	59.395
	79.96	81.851
	75.581	62.388
	68.628	72.746
	113.684	60.741
	108.569	69.93
	76.194	47.281
	110.037	49.219
	96.313	42.151
	92.417	105.368
	98.493	78.191
	97.471	69.12
	73.412	68.576
	107.951	48.822
	108.707	80.973
	107.055	57.904
	103.076	63.766
	103.843	64.391
	103.504	51.793
	85.803	44.54
	86.656	112.762
	83.407	105.644
	103.208	83.352
	108.397	64.316
	101.795	73.146
	110.117	52.436
	105.678	61.011
	72.203	73.647
	95.012	44.327
	91.797	53.132
	95.383	34.706
	73.239	52.312
	73.055	53.226
	101.577	72.053
	108.74	59.552
	100.364	27.926
	94.806	54.104
	97.792	57.005
	98.031	56.425
	98.584	35.224
	91.444	59.324
	82.294	48.507
	88.112	109.219
		103.869
		77.347
		80.587
		57.411
		60.338
		53.493
		68.054
		56.326
		41.187
		72.495
		98.292
		68.114
		57.002
		28.812
		56.066
		55.766
		51.411
		44.03
		52.432
		44.672

## Sheet: Figure 6I
	Figure 6 - Source Data 1
	Figure 6I: Cumulative tip cell leading edge displacement (µm).
	Control (0.02% EtOH)
	Time, min	tip cell 1	tip cell 2	tip cell 3	tip cell 4	tip cell 5	tip cell 6	tip cell 7	tip cell 8	tip cell 9	tip cell 10	tip cell 11	tip cell 12	tip cell 13	tip cell 14	tip cell 15	tip cell 16	tip cell 17	tip cell 18	tip cell 19	tip cell 20	tip cell 21	tip cell 22	tip cell 23	tip cell 24	tip cell 25	tip cell 26	tip cell 27	tip cell 28	tip cell 29
	0	0	0	0	0	0	0	0	0	0	0	0	0	0	0	0	0	0	0	0	0	0	0	0	0	0	0	0	0	0
	5	0.426	2.667	2.665	1.916	1.387	-0.164	-1.848	0.869	5.155	1.374	2.372	0.149	1.13	0.485	1.389	7.758	-3.052	1.081	-0.514	-0.806	-0.349	0	3.934	2.413	-0.914	0.323	2.07	-2.814	4.065
	10	1.266	3.661	3.677	2.629	0.483	5.673	-5.167	0.806	9.634	3.44	3.687	0.199	1.965	0.238	2.556	11.935	0.359	1.339	3.91	4.58	-0.674	1.449	2.514	1.948	-0.931	3.028	2.711	-4.746	3.96
	15	-0.988	4.724	9.88	2.018	0.407	8.934	0.763	5.277	9.238	3.63	-0.392	2.677	2.997	-0.647	2.093	11.221	4.274	1.339	8.632	1.166	-1.448	5.534	5.96	1.319	0.975	2.607	6.619	-3.185	6.099
	20	0.15	4.467	12.78	-2.809	1.161	12.478	-11.291	5.023	11.063	3.51	0.625	9.475	2.395	-0.651	2.361	13.866	0.972	2.114	8.725	-0.234	-1.507	0.155	7.768	-0.523	2.338	2.368	7.009	0.588	9.661
	25	-0.423	9.39	13.638	-1.734	1.753	13.487	-11.796	5.898	-0.998	5.946	-1.112	10.259	3.843	0.686	2.382	19.938	1.867	-0.39	9.968	4.475	0.672	2.497	9.88	1.027	0.569	3.95	6.061	-2.482	14.264
	30	0.737	9.153	15.444	1.813	3.402	15.452	-19.49	4.393	-5.396	8.156	3.444	10.549	3.774	1.284	4.357	23.564	3	0.388	12.811	2.927	4.578	5.133	11.245	2.334	1.313	3.95	6.169	0.207	14.989
	35	1.688	6.824	19.437	4.53	2.063	18.618	-14.404	11.749	8.854	8.769	5.47	12.803	5.556	2.248	4.893	25.175	-0.294	-0.376	12.045	4.913	6.384	5.515	12.545	2.004	1.645	2.497	5.07	2.173	9.067
	40	1.925	6.472	23.553	3.139	3.845	19.818	-3.308	18.243	9.733	9.468	5.123	18.515	7.088	1.795	7.513	20.965	-0.335	2.484	11.717	4.499	8.764	10.902	10.609	-0.103	3.362	5.066	5.221	5.125	14.127
	45	2.914	8.002	27.486	7.252	7.749	16.391	-0.899	25.505	7.69	10.495	5.917	20.017	10.861	1.738	8.536	25.766	-1.238	4.004	15.119	5.222	10.283	12.401	15.41	0.016	7.677	8.772	3.844	7.097	10.602
	50	1.114	12.585	31.82	9.891	5.658	23.043	0.889	28.059	12.696	11.99	8.371	19.578	11.834	1.692	8.987	26.675	-1.868	7.782	19.691	5.194	17.63	13.929	10.994	-1.72	10.782	9.215	7.072	7.987	11.066
	55	-3.482	7.602	31.511	9.131	2.309	21.712	1.874	30.169	18.435	10.858	10.264	24.517	13.593	2.125	11.067	26.379	1.115	19.003	15.992	8.191	25.12	11.893	16.852	-5.037	10.064	12.846	6.533	4.656	12.224
	60	-1.36	8.903	34.899	9.751	-8.891	20.428	4.183	38.282	21.059	13.103	10.298	27.217	17.133	2.5	18.946	26.27	-4.957	11.746	18.557	7.146	29.561	12.674	12.204	-4.609	12.025	12.814	7.724	4.506	11.414
	65	-4.285	10.186	38.672	8.093	-9.532	22.51	10.068	36.075	25.131	15.535	11.845	29.945	18.946	7.933	22.413	25.491	-7.725	10.935	24.107	7.295	28.287	12.593	18.508	-1.801	9.035	15.312	9.22	7.5	12.86
	70	-1.727	10.493	39.339	11.058	-7.912	23.684	3.581	38.396	27.683	16.56	12.572	34.324	20.349	13.565	29.965	24.878	-7.551	15.774	24.924	10.311	28.738	16.998	22.798	0.066	8.417	17.405	10.833	9.119	14.28
	75	1.083	9.43	42.821	13.497	1.493	29.111	4.945	43.527	27.672	17.784	7.985	36.344	23.166	19.299	26.681	25.378	-8.287	18.259	29.48	14.345	29.658	19.941	23.119	2.094	9.718	18.668	12.179	11.199	14.795
	80	-2.07	12.435	43.863	20.145	2.263	36.148	5.154	46.134	33.494	17.481	10.351	38.94	29.757	22.888	11.528	28.893	-4.483	18.01	31.966	15.463	31.147	29.982	22.449	0.429	8.658	20.227	15.475	11.802	18.685
	85	-0.21	14.673	46.272	20.26	0.624	39.905	12.146	46.86	33.823	17.894	10.811	41.985	31.615	26.979	6.696	28.403	-2.887	20.447	33.506	14.71	31.647	30.269	26.258	-0.524	11.022	21.015	14.922	11.657	21.342
	90	2.9	16.151	47.164	30.458	2.991	42.762	11.846	43.986	35.665	20.454	12.706	43.748	38.195	29.677	1.85	33.701	-1.909	17.836	35.317	15.6	34.563	34.952	29.211	-0.604	14.722	18.993	22.861	9.682	22.514
	95	8.282	15.661	49.125	35.282	2.563	42.762	13.923	43.32	38.831	24.555	12.933	45.598	37.886	30.783	3.82	34.838	0.632	20.832	35.457	17.195	33.186	36.442	32.776	-0.203	16.567	22.269	23.175	7.649	22.225
	100	11.637	14.908	53.187	38.002	7.789	42.762	19.007	44.001	41.158	26.029	11.977	50.854	35.94	28.823	3.321	34.809	2.952	23.997	34.243	19.143	38.877	37.179	33.659	0.824	24.433	24.684	29.843	6.168	23.264
	105	14.975	15.708	54.135	38.941	8.196	42.762	27.161	51.008	44.932	27.654	12.966	51.956	38.536	33.379	2.956	34.978	5.219	32.026	35.434	23.783	41.025	39.608	35.251	3.524	30.109	27.792	30.326	10.741	25.92
	110	15.829	22.019	52.332	43.834	8.483	42.762	27.833	51.008	44.244	28.577	14.527	51.727	39.51	34.791	3.929	37.996	14.141	33.546	37.071	32.824	42.275	45.461	33.966	0.054	32.247	31.581	31.381	12.535	27.639
	115	24.049	21.158	52.803	45.504	11.088	42.762	26.379	51.008	45.045	38.039	19.494	52.737	42.379	33.612	6.097	37.623	7.68	38.314	36.657	33.371	46.402	46.112	35.353	2.95	32.361	36.126	35.377	18.165	38.095
	120	23.122	20.948	56.492	46.152	11.088	42.762	31.283	51.008	45.045	48.784	20.977	54.609	44.525	34.906	6.994	39.552	3.074	38.627	36.331	34.922	48.692	45.398	39.554	2.859	34.842	39.23	36.715	19.291	41.998
	125	25.874	22.908	58.501	44.621	9.899	42.762	37.171	51.008	45.045	49.734	23.395	54.609	42.038	34.85	7.686	39.552	3.893	43.956	42.629	30.198	49.855	44.782	40.634	1.8	39.27	43.349	40.234	20.011	35.915
	130	27.055	25.994	61.27	48.844	13.884	42.762	41.25	51.008	45.045	52.348	25.662	54.609	42.825	38.269	9.584	39.552	3.386	44.543	43.897	29.323	52.395	50.525	41.2	-1.601	39.871	44.599	40.638	21.552	45.79
	135	27.787	28.107	61.27	52.592	15.33	42.762	45.595	51.008	45.045	54.283	33.947	54.609	45.868	38.79	11.409	39.552	1.556	48.177	46.636	35.414	52.395	51.323	41.66	1.07	41.31	44.352	42.06	27.647	46.676
	140	31.006	29.471	61.27	54.853	14.857	42.762	44.003	51.008	45.045	55.899	37.985	54.609	44.729	38.234	14.147	39.552	-0.176	47.563	48.534	37.022	52.395	52.115	51.143	1.528	41.725	46.091	43.634	29.522	47.312
	145	37.144	34.758	61.27	55.532	15.322	42.762	45.259	51.008	45.045	57.955	44.974	54.609	46.656	38.234	19.206	39.552	0.132	45.917	48.897	43.764	52.395	57.455	51.465	3.7	49.925	47.69	51.199	31.415	52.208
	150	39.222	39.495	61.27	64.968	15.728	42.762	46.54	51.008	45.045	57.955	44.782	54.609	46.656	38.234	19.513	39.552	2.874	46.276	48.897	43.866	52.395	57.47	54.603	6.274	48.64	49.833	49.989	37.359	51.086
	155	39.849	45.029	61.27	67.448	16.232	42.762	48.859	51.008	45.045	57.955	47.657	54.609	46.656	38.234	20.97	39.552	4.878	46.276	48.897	46.192	52.395	59.677	59.196	7.013	49.306	51.981	51.834	40.716	53.93
	160	41.45	45.735	61.27	69.767	18.996	42.762	49.091	51.008	45.045	57.955	48.7	54.609	46.656	38.234	24.897	39.552	3.347	46.276	48.897	46.772	52.395	59.677	59.196	13.197	53.156	57.045	52.85	42.103	55.436
	165	42.644	48.129	61.27	71.257	15.855	42.762	56.673	51.008	45.045	57.955	44.734	54.609	46.656	38.234	26.322	39.552	5.659	46.276	48.897	45.129	52.395	59.677	59.196	20.231	53.577	54.666	56.646	41.645	59.985
	170	43.924	50.53	61.27	71.257	15.822	42.762	58.731	51.008	45.045	57.955	46.655	54.609	46.656	38.234	27.961	39.552	7.175	46.276	48.897	49.121	52.395	59.677	59.196	24.741	53.577	53.532	56.646	41.88	60.436
	175	43.332	54.445	61.27	71.257	18.406	42.762	58.966	51.008	45.045	57.955	48.195	54.609	46.656	38.234	31.514	39.552	11.908	46.276	48.897	50.017	52.395	59.677	59.196	26.599	53.577	54.907	56.646	41.638	60.436
	180	45.643	56.405	61.27	71.257	27.65	42.762	58.074	51.008	45.045	57.955	49.18	54.609	46.656	38.234	32.533	39.552	11.997	46.276	48.897	49.823	52.395	59.677	59.196	24.443	53.577	55.53	56.646	46.221	62.29
	185	42.603	59.148	61.27	71.257	35.851	42.762	61.179	51.008	45.045	57.955	54.596	54.609	46.656	38.234	32.811	39.552	17.368	46.276	48.897	49.267	52.395	59.677	59.196	23.377	53.577	55.53	56.646	47.37	62.217
	190	46.271	58.489	61.27	71.257	38.023	42.762	58.084	51.008	45.045	57.955	56.276	54.609	46.656	38.234	36.209	39.552	20.212	46.276	48.897	56.139	52.395	59.677	59.196	28.59	53.577	55.53	56.646	48.735	64.782
	195	45.812	59.434	61.27	71.257	42.643	42.762	61.069	51.008	45.045	57.955	56.276	54.609	46.656	38.234	40.603	39.552	17.195	46.276	48.897	52.02	52.395	59.677	59.196	30.539	53.577	55.53	56.646	52.653	66.34
	200	45.444	60.089	61.27	71.257	45.974	42.762	62.398	51.008	45.045	57.955	56.276	54.609	46.656	38.234	43.807	39.552	20.715	46.276	48.897	54.846	52.395	59.677	59.196	40.027	53.577	55.53	56.646	56.271	67.811
	205	46.656	62.242	61.27	71.257	47.158	42.762	62.398	51.008	45.045	57.955	56.276	54.609	46.656	38.234	44.826	39.552	26.621	46.276	48.897	54.29	52.395	59.677	59.196	42.144	53.577	55.53	56.646	56.707	67.811
	210	45.533	62.255	61.27	71.257	48.816	42.762	62.398	51.008	45.045	57.955	56.276	54.609	46.656	38.234	43.721	39.552	31.464	46.276	48.897	53.873	52.395	59.677	59.196	43.008	53.577	55.53	56.646	57.44	67.811
	215	47.727	62.265	61.27	71.257	51.573	42.762	62.398	51.008	45.045	57.955	56.276	54.609	46.656	38.234	48.448	39.552	33.959	46.276	48.897	53.873	52.395	59.677	59.196	43.539	53.577	55.53	56.646	57.44	67.811
	220	49.257	62.355	61.27	71.257	51.365	42.762	62.398	51.008	45.045	57.955	56.276	54.609	46.656	38.234	48.448	39.552	35.611	46.276	48.897	53.873	52.395	59.677	59.196	43.539	53.577	55.53	56.646	57.44	67.811
	225	49.281	62.555	61.27	71.257	52.353	42.762	62.398	51.008	45.045	57.955	56.276	54.609	46.656	38.234	48.448	39.552	40.176	46.276	48.897	53.873	52.395	59.677	59.196	47.264	53.577	55.53	56.646	57.44	67.811
	230	49.357	63.6	61.27	71.257	56.392	42.762	62.398	51.008	45.045	57.955	56.276	54.609	46.656	38.234	48.448	39.552	41.617	46.276	48.897	53.873	52.395	59.677	59.196	47.264	53.577	55.53	56.646	57.44	67.811
	235	50.315	66.457	61.27	71.257	58.258	42.762	62.398	51.008	45.045	57.955	56.276	54.609	46.656	38.234	48.448	39.552	42.24	46.276	48.897	53.873	52.395	59.677	59.196	47.264	53.577	55.53	56.646	57.44	67.811
	240	54.237	67.693	61.27	71.257	58.605	42.762	62.398	51.008	45.045	57.955	56.276	54.609	46.656	38.234	48.448	39.552	42.083	46.276	48.897	53.873	52.395	59.677	59.196	47.264	53.577	55.53	56.646	57.44	67.811
	245	54.237	67.693	61.27	71.257	59.104	42.762	62.398	51.008	45.045	57.955	56.276	54.609	46.656	38.234	48.448	39.552	44.852	46.276	48.897	53.873	52.395	59.677	59.196	47.264	53.577	55.53	56.646	57.44	67.811
	250	54.237	67.693	61.27	71.257	60.185	42.762	62.398	51.008	45.045	57.955	56.276	54.609	46.656	38.234	48.448	39.552	48.804	46.276	48.897	53.873	52.395	59.677	59.196	47.264	53.577	55.53	56.646	57.44	67.811
	255	54.237	67.693	61.27	71.257	62.207	42.762	62.398	51.008	45.045	57.955	56.276	54.609	46.656	38.234	48.448	39.552	49.597	46.276	48.897	53.873	52.395	59.677	59.196	47.264	53.577	55.53	56.646	57.44	67.811
	260	54.237	67.693	61.27	71.257	62.282	42.762	62.398	51.008	45.045	57.955	56.276	54.609	46.656	38.234	48.448	39.552	50.142	46.276	48.897	53.873	52.395	59.677	59.196	47.264	53.577	55.53	56.646	57.44	67.811
	265	54.237	67.693	61.27	71.257	61.578	42.762	62.398	51.008	45.045	57.955	56.276	54.609	46.656	38.234	48.448	39.552	50.459	46.276	48.897	53.873	52.395	59.677	59.196	47.264	53.577	55.53	56.646	57.44	67.811
	270	54.237	67.693	61.27	71.257	62.507	42.762	62.398	51.008	45.045	57.955	56.276	54.609	46.656	38.234	48.448	39.552	53.415	46.276	48.897	53.873	52.395	59.677	59.196	47.264	53.577	55.53	56.646	57.44	67.811
	275	54.237	67.693	61.27	71.257	62.557	42.762	62.398	51.008	45.045	57.955	56.276	54.609	46.656	38.234	48.448	39.552	52.34	46.276	48.897	53.873	52.395	59.677	59.196	47.264	53.577	55.53	56.646	57.44	67.811
	280	54.237	67.693	61.27	71.257	62.557	42.762	62.398	51.008	45.045	57.955	56.276	54.609	46.656	38.234	48.448	39.552	53.739	46.276	48.897	53.873	52.395	59.677	59.196	47.264	53.577	55.53	56.646	57.44	67.811
	285	54.237	67.693	61.27	71.257	62.557	42.762	62.398	51.008	45.045	57.955	56.276	54.609	46.656	38.234	48.448	39.552	53.739	46.276	48.897	53.873	52.395	59.677	59.196	47.264	53.577	55.53	56.646	57.44	67.811
	290	54.237	67.693	61.27	71.257	62.557	42.762	62.398	51.008	45.045	57.955	56.276	54.609	46.656	38.234	48.448	39.552	53.739	46.276	48.897	53.873	52.395	59.677	59.196	47.264	53.577	55.53	56.646	57.44	67.811
	295	54.237	67.693	61.27	71.257	62.557	42.762	62.398	51.008	45.045	57.955	56.276	54.609	46.656	38.234	48.448	39.552	53.739	46.276	48.897	53.873	52.395	59.677	59.196	47.264	53.577	55.53	56.646	57.44	67.811
	DCPIB treated (5 µM)
	Time, min	tip cell 1	tip cell 2	tip cell 3	tip cell 4	tip cell 5	tip cell 6	tip cell 7	tip cell 8	tip cell 9	tip cell 10	tip cell 11	tip cell 12	tip cell 13	tip cell 14	tip cell 15	tip cell 16	tip cell 17	tip cell 18	tip cell 19	tip cell 20	tip cell 21	tip cell 22	tip cell 23	tip cell 24	tip cell 25	tip cell 26	tip cell 27	tip cell 28	tip cell 29
	0	0	0	0	0	0	0	0	0	0	0	0	0	0	0	0	0	0	0	0	0	0	0	0	0	0	0	0	0	0
	5	-1.257	0.355	0.003	-1.678	-0.248	-2.237	1.834	0.326	3.185	2.494	0.566	0.677	2.705	-1.358	-0.175	0.586	0.356	0.121	5.455	2.296	-0.054	3.064	1.55	-4.217	0.886	3.136	1.006	1.712	0.268
	10	-0.809	0.58	0.647	0.612	1.437	-3.368	1.055	0.791	-3.107	2.46	-0.111	3.135	4.785	0.185	0.139	2.225	2.849	-1.277	9.467	5.315	-1.592	3.572	2.928	0.307	-3.903	3.78	-0.712	3.052	-0.662
	15	0.103	-0.469	1.091	-0.615	0.074	-4.848	0.146	0.799	-1.617	3.539	0.187	5.526	5.654	-2.866	-0.346	4.149	5.21	0.005	10.846	4.697	1.791	3.439	11.02	1.606	-4.303	3.894	-0.376	5.91	1.308
	20	4.199	0.067	0.782	-2.427	-2.097	-5.266	0.36	2.649	-5.456	3.847	-1.062	5.27	5.341	-1.631	-0.836	8.62	8.339	2.517	10.02	6.314	5.13	6.381	11.731	2.743	-0.24	3.328	-0.493	5.193	2.892
	25	5.765	0.371	1.509	-1.635	-4.449	-4.865	0.001	2.4	-4.736	6.776	-1.31	5.86	7.067	-1.325	0.365	14.062	8.91	0.141	11.465	7.373	7.65	7.182	13.014	5.177	3.437	4.424	0.881	7.726	4.158
	30	6.468	-1.017	1.296	-1.791	-3.347	-4.072	2.416	2.503	-4.781	8.831	-0.168	5.927	8.729	-0.859	-0.22	12.569	9.078	0.055	14.481	7.784	8.43	6.521	12.527	3.665	3.437	9.975	1.6	5.763	5.139
	35	6.479	-0.447	1.551	-0.455	-1.62	-0.019	4.365	2.058	-0.556	8.639	1.632	4.101	9.383	0.19	-1.295	12.588	10.682	-1.365	13.826	7.28	10.405	7.31	12.386	4.078	6.516	10.589	-0.193	5.489	8.718
	40	5.178	1.326	1.238	2.378	-0.82	-3.496	5.403	2.858	0.111	7.595	2.274	5.189	7.767	-0.068	-0.162	11.297	10.723	1.247	14.484	9.563	11.091	10.218	11.8	3.786	9.381	9.229	1.108	8.602	10.597
	45	7.33	-0.622	0.663	1.532	-1.162	-2.761	4.629	3.349	1.928	7.726	0.575	5.261	5.804	-0.205	-0.827	12.665	10.96	1.353	14.945	10.255	13.122	14.9	11.534	3.786	15.454	8.934	-0.12	12.169	14.372
	50	5.009	-1.317	3.142	4.105	-4.634	0.586	1.25	2.562	2.232	7.414	1.392	3.227	6.537	0.704	-0.033	11.077	9.001	2.958	15.264	10.615	15.059	10.685	15.558	3.256	14.313	10.325	2.528	9.058	18.19
	55	4.891	-2.307	3.63	4.579	-4.271	2.327	0.241	5.357	2.957	8.054	0.219	2.938	9.184	1.787	0.22	10.613	10.624	3.142	14.796	12.783	16.08	10.603	16.311	5.317	16.449	10.514	2.085	8.806	15.536
	60	4.209	-3.057	4.084	4.091	-1.567	-3.126	0.654	5.298	4.017	8.866	0.732	5.642	9.763	1.908	2.217	10.262	10.651	5.6	13.926	12.226	16.044	14.593	16.881	4.961	16.549	10.599	-1.658	9.567	14.786
	65	5.312	-3.057	4.848	4.595	-2.257	-3.959	0.539	5.9	2.232	10.467	-1.974	4.871	9.309	2.814	3.008	12.774	11.691	4.789	12.302	12.223	17.211	15.01	17.304	3.9	18.552	12.851	-8.359	7.818	13.652
	70	5.545	-4.488	6.358	5.679	-1.921	-3.06	1.703	4.55	2.02	11.156	-2.777	1.846	9.522	7.754	2.627	12.721	9.777	5.944	13.216	13.527	17.771	16.147	20.642	0.775	18.062	12.572	-8.814	6.815	11.956
	75	2.154	-5.499	6.222	5.679	-0.467	-2.375	2.021	2.735	5.352	11.643	-6.365	3.596	6.439	3.957	3.957	12.874	11.791	7.085	13.328	12.942	17.346	17.912	22.644	-8.934	17.222	11.407	-4.044	10.687	12.173
	80	2.205	-9.681	9.116	6.189	-2.803	-1.257	2.435	4.836	5.41	11.937	-5.68	3.959	7.229	3.711	5.962	13.156	13.037	8.601	15.07	12.761	14.729	16.146	16.952	-13.118	17.739	12.802	-4.628	12.556	10.436
	85	5.821	-10.611	10.499	7.446	-1.458	1.293	1.606	4.153	5.342	10.871	-0.934	5.141	8.561	4.73	5.273	15.302	12.79	8.506	16.307	15.492	14.714	33.518	13.142	-6.626	17.884	16.68	-1.219	10.79	12.318
	90	7.918	-11.434	10.031	9.135	0.596	0.282	1.892	5.775	3.74	11.434	3.433	4.217	10.92	1.837	5.273	18.535	11.05	7.419	15.607	10.816	15.224	35.821	15.385	-0.515	18.681	16.701	-0.351	10.045	14.363
	95	10.606	-6.291	10.902	10.866	0.786	-1.546	2.412	5.434	2.885	10.849	-1.507	3.88	9.684	1.692	4.93	18.567	11.274	5.796	14.313	7.04	15.964	37.197	14.863	0.87	16.49	14.724	0.121	11.814	14.033
	100	14.242	-4.3	9.922	13.461	-0.711	-1.533	3.8	8.3	5.868	12.758	2.379	3.606	10.691	4.005	7.8	16.462	10.821	4.104	15.903	9.866	15.504	38.36	13.564	0.59	17.924	18.331	4.482	13.286	15.205
	105	15.982	-4.397	10.003	14.794	-3.292	-12.605	3.715	7.35	4.698	10.594	3.235	3.364	8.153	1.898	8.612	14.768	10.814	-3.115	15.324	10.001	13.798	39.627	13.55	3.168	20.622	13.998	6.254	8.711	12.525
	110	15.771	-5.013	9.454	15.877	-3.623	-15.248	4.197	6.745	4.333	13.172	3.781	0.791	6.947	3.394	9.237	13.915	14.721	-4.287	14.742	12.574	19.356	39.735	15.896	4.472	18.59	11.665	7.619	9.724	12.731
	115	18.684	-3.299	9.454	18.991	-10.786	-15.062	2.686	4.564	3.188	10.877	4.781	0.216	6.846	4.42	11.901	13.826	14.031	-3.564	15.432	13.035	18.887	39.746	15.654	7.459	18.28	13.918	6.931	9.694	14.466
	120	17.247	-3.784	10.308	20.351	-12.811	-10.252	3.136	6.184	3.389	11.342	0.128	5.036	6.903	5.471	13.731	12.995	14.378	-2.237	15.002	16.738	19.545	44.028	15.654	7.459	14.864	13.933	7.565	11.115	16.751
	125	19.74	-3.605	11.124	20.481	-17.349	-5.454	2.993	4.394	2.223	12.814	2.022	5.488	9.227	5.426	13.609	13.785	15.681	-2.466	14.526	17.307	23.769	44.066	15.823	7.569	15.122	14.079	8.601	13.727	17.72
	130	28.467	-1.72	11.335	21.67	-13.325	-3.615	3.643	5.297	1.961	13.359	-0.139	5.71	4.811	5.105	13.605	14.882	14.491	-2.293	14.42	19.557	22.499	43.31	14.21	11.366	15.672	11.969	11.63	14.279	17.984
	135	27.885	-1.457	14.27	21.084	-11.767	-1.409	2.259	7.964	2.663	14.695	1.911	6.196	7.446	5.913	13.607	14.359	14.148	-1.55	14.482	25.773	23.282	43.648	14.061	13.326	17.749	13.784	13.966	15.892	16.945
	140	29.418	-1.744	14.286	21.66	-11.01	-0.599	2.051	9.875	2.801	14.285	4.399	5.375	9.062	6.888	13.561	18.693	13.236	-0.584	16.169	26.442	23.912	43.712	16.945	14.888	19.208	13.924	12.212	17.987	20.527
	145	36.646	-1.558	15.407	20.922	-9.653	-1.874	3.088	11.283	5.314	10.534	5.211	5.835	7.927	6.4	13.131	20.75	13.445	0.554	17.057	26.457	22.967	43.712	17.441	21.245	17.3	14.061	11.769	19.014	22.704
	150	38.359	0.244	12.57	24.822	-10.577	-0.838	1.994	10.478	6.026	8.013	5.879	5.107	11.001	6.614	12.76	19.705	12.763	2.459	15.92	30.798	21.664	43.712	20.27	25.357	15.66	13.771	10.829	23.46	21.094
	155	38.273	3.307	14.325	23.899	-7.408	1.862	1.201	11.415	5.797	9.951	7.126	5.82	10.479	8.092	13.239	18.491	12.405	3.499	14.657	35.487	21.294	43.712	15.522	33.022	17.098	15.066	13.305	19.73	20.608
	160	39.559	6.507	13.16	22	-8.188	1.339	1.888	11.319	5.444	9.302	8.464	8.131	9.266	11.514	14.44	21.897	12.548	4.078	14.912	36.195	22.546	43.712	15.53	35.171	21.964	18.014	12.765	7.548	21.127
	165	39.541	5.932	13.666	22.759	-6.742	0.081	2.332	11.92	8.108	10.111	8.423	7.276	10.003	9.537	16.619	22.567	12.103	6.374	14.587	36.902	21.979	43.712	16.603	34.094	24.306	16.236	17.916	7.244	21.341
	170	41.066	7.271	15.063	19.17	-6.25	0.826	2.427	13.85	12.225	10.843	12.055	9.958	10.511	9.578	18.252	23.158	11.82	5.336	21.885	35.91	22.519	43.712	18.926	38.663	26.739	20.315	24.154	17.897	20.254
	175	42.461	8.218	15.802	18.083	-5.78	1.479	2.046	14.121	8.221	12.947	11.236	13.208	11.983	9.443	21.309	24.997	11.969	4.767	26.168	33.895	22.563	43.712	19.879	39.76	26.269	24.611	29.166	18.847	21.824
	180	43.151	8.698	15.649	20.26	-5.198	0.069	2.765	14.59	10.12	13.149	12.182	12.109	12.98	10.247	24.806	24.569	10.125	7.055	25.673	36.997	22.861	43.712	18.428	48.145	27.767	32.107	30.591	20.284	23.026
	185	44.344	7.467	16.117	20.788	-4.754	0.74	3.231	16.546	10.795	10.869	16.269	9.6	11.749	10.726	33.647	23.485	9.324	6.97	26.107	41.504	23.345	43.712	19.097	48.145	26.16	31.302	33.064	26.15	19.832
	190	43.223	8.812	14.678	19.946	-4.295	-0.586	3.351	16.723	12.129	12.756	15.203	1.879	14.133	11.513	38.219	25.485	9.385	6.824	26.524	42	26.709	43.712	26.991	48.145	24.629	34.223	33.666	25.46	23.026
	195	44.016	10.781	14.749	22.702	-2.229	1.026	3.678	17.853	16.001	12.269	15.736	2.641	10.556	12.701	38.859	25.279	8.348	8.137	29.146	43.505	28.97	43.712	30.327	48.145	27.063	34.223	35.958	24.671	24.829
	200	44.016	10.374	14.382	23.588	-3.315	2.392	4.932	18.986	16.095	15.841	19.774	6.364	13.484	12.136	40.202	23.957	9.979	7.886	30.082	43.603	30.274	43.712	31.927	48.145	26.833	38.315	37.045	27.665	21.041
	205	44.016	13.697	15.485	22.565	-2.127	1.554	3.597	22.062	17.416	15.877	19.811	7.896	11.302	10.664	40.07	23.704	11.855	6.622	30.496	43.541	31.634	43.712	33.04	48.145	29.714	39.365	37.755	31.354	19.394
	210	44.016	16.14	14.739	31.629	-2.87	1.894	4.633	24.339	15.649	13.047	22.263	9.471	11.619	12.195	38.781	24.761	10.23	5.37	28.448	44.05	33.259	43.712	31.107	48.145	30.06	41.533	38.943	32.621	22.62
	215	44.016	16.19	14.376	33.81	-2.188	3.823	4.435	24.271	7.645	14.594	23.342	-0.077	11.982	13.042	41.09	24.755	9.038	7.205	27.205	46.31	33.431	43.712	34.368	48.145	30.799	42.304	43.072	33.887	23.256
	220	44.016	15.453	13.799	38.008	-1.171	5.022	6.038	22.532	6.461	14.707	26.204	8.068	13.361	14.448	40.287	25.109	8.119	5.334	27.79	46.796	34.374	43.712	33.232	48.145	26.371	42.872	42.64	35.275	26.813
	225	44.016	15.299	13.138	40.187	-1.588	9.643	6.027	25.576	7.156	15.103	28.97	11.281	12.484	14.725	41.601	26.099	8.588	10.531	28.995	45.79	33.693	43.712	29.857	48.145	26.096	43.86	43.288	35.165	21.422
	230	44.016	15.744	16.389	41.706	-1.604	10.507	7.047	25.676	10.541	14.671	28.448	9.824	14.021	15.542	42.845	27.163	8.023	10.184	36.857	47.653	33.992	43.712	25.925	48.145	27.848	44.264	44.309	36.232	24.746
	235	44.016	14.708	15.547	41.42	-1.572	14.984	7.658	26.315	12.787	18.015	31.085	9.526	16.518	17.019	43.502	27.874	9.875	10.216	37.077	46.727	34.671	43.712	28.266	48.145	28.101	45.869	48.408	41.595	24.04
	240	44.016	15.152	16.793	42.953	-1.098	17.92	6.549	29.281	16.064	18.878	34.572	7.795	17.278	16.871	45.355	29.087	10.748	9.223	30.676	49.431	34.554	43.712	31.816	48.145	28.101	48.181	49.794	41.825	34.679
	245	44.016	16.14	16.666	44.462	-1.003	19.475	8.97	30.21	18.964	22.689	32.918	9.135	18.616	17.088	42.156	28.875	12.412	7.876	30.413	48.887	37.627	43.712	33.486	48.145	28.353	50.068	50.919	44.072	35.77
	250	44.016	19.047	16.761	45.6	-0.996	22.153	7.52	32.374	22.679	18.124	35.951	8.929	20.453	17.18	46.808	29.784	10.002	8.979	32.274	49.654	37.616	43.712	36.835	48.145	28.194	49.185	53.462	46.892	34.372
	255	44.016	20.315	16.348	45.721	1.403	24.953	12.435	33.619	23.129	17.56	33.665	17.275	22.32	15.417	46.161	30.235	11.728	9.202	31.697	49.654	37.531	43.712	42.194	48.145	27.792	48.266	54.605	49.9	34.795
	260	44.016	22.316	17.101	46.744	2.148	25.768	11.269	34.251	23.368	16.279	35.277	17.417	25.103	14.511	47.886	30.666	14.553	8.887	31.739	49.654	40.892	43.712	44.133	48.145	27.52	48.048	54.882	50.227	36.468
	265	44.016	23.933	17.698	45.28	3.481	26.85	7.702	35.866	28.353	12.825	35.623	14.983	29.417	15.395	53.039	31.137	14.098	8.448	34.249	49.654	40.189	43.712	48.837	48.145	28.353	50.473	56.139	53.341	39.086
	270	44.016	24.434	17.671	47.34	3.472	29.849	7.264	38.145	29.804	10.797	39.735	17.148	33.408	13.639	52.783	31.539	13.766	8.668	34.463	49.654	39.594	43.712	50.308	48.145	31.86	49.722	50.998	52.983	43.078
	275	44.016	24.198	16.8	46.093	4.63	33.501	6.109	40.376	30.295	12.846	38.379	18.456	35.958	14.422	54.118	33.521	14.214	10.151	35.238	49.654	38.548	43.712	50.308	48.145	36.783	49.841	47.108	48.689	43.952
	280	44.016	28.257	17.224	46.418	8.51	41.156	10.856	42.31	30.151	14.183	39.097	17.716	40.417	14.347	52.23	34.508	17.194	11.997	36.518	49.654	36.923	43.712	51.721	48.145	40.577	46.014	47.755	55.8	41.925
	285	44.016	29.789	17.729	48.029	8.596	47.533	10.124	42.092	31.213	13.264	38.225	13.279	44.016	16.31	51.972	32.882	14.98	8.891	39.347	49.654	36.076	43.712	51.431	48.145	44.241	45.213	47.455	54.295	42.209
	290	44.016	30.287	15.065	48.013	9.257	47.298	9.648	43.555	31.18	15.165	40.575	11.969	48.032	18.504	51.8	30.311	17.548	3.197	38.657	49.654	37.786	43.712	52.142	48.145	44.241	44.261	48.164	52.547	41.706
	295	44.016	32.232	12.271	48.033	6.789	46.109	8.838	45.51	31.388	14.572	40.111	12.879	50.679	18.665	51.735	29.445	16.375	3.687	37.567	49.654	40.979	43.712	54.076	48.145	48.298	43.944	49.539	49.345	45.155

## Sheet: Figure 6J
	Figure 6 - Source Data 1
	Figure 6J: Average tip cell velocity (µm/min).
	Control	DCPIB
	0.226	0.226		Unpaired t test
	0.282	0.109		P value	<0.0001
	0.471	0.042		P value summary	****
	0.432	0.163		Significantly different (P < 0.05)?	Yes
	0.227	0.023		One- or two-tailed P value?	Two-tailed
	0.475	0.156		t, df	t=9.788, df=56
	0.312	0.03
	0.486	0.154		How big is the difference?
	0.392	0.106		Mean of control	0.3334
	0.4	0.049		Mean of DCPIB-treated	0.1326
	0.296	0.136		Difference between means (B - A) ± SEM	-0.2009 ± 0.02052
	0.455	0.044		95% confidence interval	-0.2420 to -0.1598
	0.322	0.172		R squared (eta squared)	0.6311
	0.273	0.063
	0.225	0.175		F test to compare variances
	0.33	0.1		F, DFn, Dfd	1.302, 28, 28
	0.192	0.056		P value	0.4898
	0.309	0.012		P value summary	ns
	0.337	0.127		Significantly different (P < 0.05)?	No
	0.257	0.199
	0.403	0.139		Data analyzed
	0.385	0.312		Sample size, control	29
	0.382	0.183		Sample size, DCPIB-treated	29
	0.21	0.267
	0.325	0.164
	0.309	0.149
	0.343	0.168
	0.274	0.167
	0.339	0.153

## Sheet: Figure 6K
	Figure 6 - Source Data 1
	Figure 6K: Average number of filopodia/100 µm (pool data from 3 independent experiments).
	Control	DCPIB
	33	13		Unpaired t test
	24	15		P value	<0.0001
	37	32		P value summary	****
	28	30		Significantly different (P < 0.05)?	Yes
	30	31		One- or two-tailed P value?	Two-tailed
	35	21		t, df	t=8.758, df=85
	35	23
	32	32		How big is the difference?
	31	18		Mean of control	32.29
	40	26		Mean of DCPIB-treated	20.08
	25	26		Difference between means (B - A) ± SEM	-12.22 ± 1.395
	35	20		95% confidence interval	-14.99 to -9.445
	27	27		R squared (eta squared)	0.4743
	27	15
	29	13		F test to compare variances
	34	18		F, DFn, Dfd	1.111, 33, 52
	27	19		P value	0.7208
	30	26		P value summary	ns
	37	18		Significantly different (P < 0.05)?	No
	42	24
	44	13		Data analyzed
	40	17		Sample size, control	34
	51	20		Sample size, DCPIB-treated	53
	41	20
	34	15
	24	15
	22	12
	25	12
	28	15
	33	22
	27	32
	29	20
	27	29
	35	12
		33
		11
		17
		16
		17
		18
		30
		17
		25
		21
		25
		20
		15
		20
		19
		14
		12
		15
		18

## Sheet: Figure 6L
	Figure 6 - Source Data 1
	Figure 6L: Length of filopodia (µm) (pool data from independent experiments).
	Control	DCPIB
	17.44	10.354		Unpaired t test
	5.817	4.631		P value	<0.0001
	17.28	6.147		P value summary	****
	6.264	2.94		Significantly different (P < 0.05)?	Yes
	5.261	5.684		One- or two-tailed P value?	Two-tailed
	8.022	3.4		t, df	t=5.095, df=2599
	2.055	3.761
	16.406	3.9		How big is the difference?
	14.075	5.323		Mean of control	5.176
	8.838	9.581		Mean of DCPIB-treated	4.608
	4.43	6.298		Difference between means (B - A) ± SEM	-0.5678 ± 0.1114
	5.24	1.895		95% confidence interval	-0.7863 to -0.3493
	10.577	3.051		R squared (eta squared)	0.009889
	2.86	5.139
	7.6	4.92		F test to compare variances
	8.81	1.747		F, DFn, Dfd	1.541, 1406, 1193
	4.025	8.821		P value	<0.0001
	4.979	6.481		P value summary	****
	4.505	2.691		Significantly different (P < 0.05)?	Yes
	2.38	4.567
	1.971	3.706		Data analyzed
	1.336	4.078		Sample size, control	1407
	5.536	3.102		Sample size, DCPIB-treated	1194
	6.382	3.608
	7.634	5.075
	2.311	6.071
	2.416	5.093
	2.063	4.531
	3.458	5.662
	2.735	4.934
	2.612	2.225
	6.845	16.667
	3.391	2.247
	2.097	5.004
	2.127	6.593
	2.859	5.18
	3.048	2.987
	1.858	6.328
	3.119	1.947
	4.304	1.956
	1.971	3.555
	3.478	4.372
	3.189	4.593
	2.437	6.335
	5.623	7.399
	2.963	2.979
	10.889	5.05
	2.291	9.455
	8.572	3.59
	7.917	7.922
	2.187	6.859
	4.08	11.806
	11.996	2.906
	2.369	6.547
	2.097	7.165
	3.484	4.005
	4.088	4.381
	4.786	4.107
	5.329	1.741
	3.097	5.692
	9.034	3.654
	5.077	8.667
	5.37	3.003
	2.187	2.601
	2.68	2.667
	3.708	3.805
	3.218	2.486
	3.089	3.883
	4.921	2.709
	1.101	2.908
	6.316	3.327
	3.285	5.711
	2.378	4.614
	2.415	2.816
	3.867	7.221
	11.832	11.533
	4.193	3.505
	7.796	3.965
	7.017	4.195
	4.4	2.376
	2.386	1.971
	1.652	2.787
	5.652	2.138
	4.989	2.61
	2.549	3.117
	4.78	5.243
	5.866	6.112
	4.791	3.955
	3.715	3.057
	4.584	2.319
	7.037	1.923
	4.645	3.798
	3.48	1.652
	5.986	2.835
	3.211	1.207
	7.92	2.296
	3.876	9.954
	3.463	7.828
	5.577	3.093
	3.983	3.382
	7.698	5.959
	2.063	11.327
	1.535	7.65
	1.546	6.402
	5.108	6.453
	5.941	2.827
	3.516	3.265
	22.171	1.947
	3.654	3.028
	2.463	1.383
	3.024	6.812
	6.19	2.827
	10.928	2.009
	4.794	5.953
	5.265	1.527
	5.844	4.342
	19.897	5.652
	12.006	2.816
	10.977	1.527
	10.725	2.493
	12.562	6.333
	2.766	4.478
	2.226	2.979
	2.938	3.157
	10.748	6.831
	5.857	2.765
	1.168	1.781
	7.651	1.849
	4.113	2.163
	2.521	2.463
	5.243	3.526
	4.359	3.864
	2.591	3.075
	2.553	3.79
	2.938	3.145
	4.743	4.448
	3.306	3.946
	5.13	3.575
	3.889	3.247
	2.601	15.193
	5.762	13.356
	8.927	14.889
	6.107	4.263
	3.211	3.327
	2.948	5.039
	1.956	8.938
	4.325	3.189
	3.516	2.376
	4.994	3.239
	5.013	3.021
	16.954	2.138
	2.519	2.465
	3.63	4.218
	6.144	6.962
	2.278	4.115
	1.708	13.381
	2.127	10.249
	4.016	5.864
	3.566	2.519
	2.127	2.379
	5.557	8.098
	3.07	3.256
	2.659	2.672
	5.225	2.637
	17.96	5.96
	4.135	4.218
	4.58	2.063
	8.567	1.983
	19.595	4.433
	10.615	4.321
	3.125	3.458
	2.493	4.874
	2.463	3.94
	2.127	3.826
	2.305	5.796
	4.244	5.392
	5.704	1.453
	5.712	1.449
	14.881	3.595
	6.089	3.78
	8.759	4.301
	11.693	4.946
	2.819	3.385
	5.86	1.849
	4.44	2.163
	2.038	3.431
	10.654	2.271
	2.612	2.378
	2.954	3.605
	2.009	3.703
	5.131	1.991
	3.297	4.571
	3.894	7.761
	5.422	5.843
	4.794	5.283
	3.139	5.204
	4.102	4.646
	5.392	5.869
	5.507	5.662
	6.19	3.199
	3.483	4.478
	2.296	10.837
	3.526	3.055
	3.965	4.523
	2.391	7.706
	6.6	4.108
	7.346	1.839
	4.42	1.546
	12.039	3.756
	9.84	4.297
	8.288	2.278
	8.444	3.644
	10.845	4.386
	6.353	4.623
	5.172	9.108
	4.685	7.656
	3.041	2.038
	4.069	8.991
	10.533	5.774
	6.243	5.044
	3.36	2.336
	3.39	2.777
	2.049	3.783
	10.053	5.693
	3.577	3.591
	2.449	2.13
	9.397	6.844
	6.095	5.403
	4.065	4.042
	2.163	7.615
	3.622	2.614
	3.894	2.376
	8.288	2.519
	2.749	2.808
	1.956	5.213
	3.293	3.089
	3.269	2.493
	6.173	2.709
	3.093	9.241
	4.689	2.971
	3.724	3.427
	3.478	6.924
	3.095	3.543
	6.232	4.82
	9.144	2.787
	4.358	2.906
	7.663	3.588
	4.169	5.968
	16.764	4.787
	8.6	2.908
	4.718	2.398
	8.711	2.182
	7.89	1.78
	8.1	2.948
	2.938	3.162
	2.811	7.164
	12.22	4.215
	5.613	4.703
	8.522	2.398
	4.86	3.643
	4.048	3.864
	5.363	7.662
	2.512	3.285
	1.264	8.208
	5.516	5.572
	12.066	4.074
	4.501	3.88
	3.24	2.542
	6.425	5.178
	6.541	6.758
	10.211	3.903
	3.478	3.538
	4.283	9.174
	4.312	2.828
	2.56	5.026
	4.453	4.867
	2.938	3.889
	7.22	5.52
	3.675	2.018
	1.858	3.811
	4.113	2.296
	5.977	5.553
	3.685	1.858
	2.173	13.885
	4.559	3.744
	3.24	6.058
	6.985	8.812
	6.287	2.81
	3.211	2.063
	9.248	7.463
	3.269	1.948
	2.63	5.71
	3.269	4.019
	7.257	3.621
	2.56	9.057
	5.29	5.979
	3.716	8.545
	4.044	7.26
	9.301	10.282
	5.876	5.423
	3.285	7.618
	6.025	3.974
	4.448	3.297
	4.135	5.843
	1.314	4.392
	2.009	5.192
	1.318	4.442
	2.61	6.263
	2.126	5.093
	21.377	5.161
	8.217	2.832
	5.086	2.976
	5.212	2.38
	7.205	11.124
	3.757	2.758
	4.246	3.188
	5.271	5.302
	4.02	3.854
	7.903	3.919
	11.289	4.794
	3.955	3.415
	3.781	3.03
	11.266	5.755
	4.909	3.137
	4.134	4.448
	2.683	1.675
	5.348	3.213
	7.548	1.766
	3.931	1.388
	2.567	2.465
	1.886	4.916
	4.51	2.053
	2.255	2.319
	2.995	7.388
	2.371	4.193
	2.288	4.024
	3.901	1.858
	11.54	5.684
	4.32	4.815
	4.649	3.211
	8.75	5.305
	5.134	4.321
	2.732	9.087
	1.956	8.368
	1.62	4.478
	1.606	1.606
	2.16	5.816
	1.527	4.667
	2.835	6.377
	17.987	3.699
	8.46	5.655
	5.574	4.891
	17.239	5.044
	7.492	5.74
	12.374	1.956
	4.083	8.734
	13.362	6.725
	8.864	4.279
	4.152	14.098
	5.981	15.749
	2.594	5.417
	2.415	7.783
	3.401	3.74
	3.431	4.58
	2.077	2.086
	4.433	2.948
	2.901	2.726
	3.026	2.437
	4.035	8.963
	8.451	4.664
	2.956	3.327
	2.171	4.523
	3.815	4.562
	2.144	2.924
	2.709	4.395
	12.898	3.483
	5.021	3.044
	2.271	11.635
	3.178	5.617
	7.353	12.222
	7.73	8.8
	6.869	3.512
	9.702	4.564
	11.94	2.91
	3.622	4.522
	3.655	3.232
	6.4	4.824
	6.048	4.379
	14	2.87
	6.882	3.433
	4.233	2.173
	14.056	4.149
	2.96	2.171
	3.271	1.923
	6.415	6.055
	1.222	1.991
	4.213	6.603
	2.918	4.987
	8.619	5.371
	3.719	6.553
	6.565	4.953
	6.819	3.166
	3.134	3.44
	3.191	2.255
	6.928	8.378
	3.516	7.798
	6.653	3.461
	2.226	3.566
	3.189	4.146
	4.368	2.415
	8.607	1.5
	5.658	14.283
	4.686	2.777
	7.642	4.41
	4.883	3.752
	2.512	6.729
	5.287	2.749
	1.788	3.257
	2.331	4.155
	2.938	2.938
	4.054	6.014
	7.054	3.008
	8.31	2.601
	5.195	3.517
	4.796	1.911
	3.055	1.839
	7.228	2.13
	5.058	2.667
	10.229	6.344
	5.362	12.25
	5.964	3.838
	1.986	3.604
	8.419	9.485
	4.102	7.288
	2.097	7.058
	2.938	5.884
	5.815	7.482
	4.471	4.408
	3.678	5.822
	3.353	8.3
	10.518	6.668
	4.522	9.104
	2.226	3.256
	8.186	4.075
	7.695	15.35
	5.682	7.375
	13.314	4.582
	5.572	9.879
	4.51	5.135
	3.479	3.382
	2.229	3.269
	2.916	3.381
	2.75	3.998
	2.601	8.364
	8.167	16.797
	7.967	7.663
	2.173	4.057
	2.906	16.118
	2.224	4.024
	3.285	3.055
	2.674	9.984
	7.257	3.839
	7.992	7.283
	9.27	8.119
	5.265	3.383
	7.359	3.544
	7.363	4.844
	7.602	1.62
	4.456	3.564
	14.155	2.226
	4.432	6.13
	6.736	3.63
	10.765	2.567
	6.634	5.195
	4.858	2.278
	3.622	2.415
	11.186	4.212
	7.747	2.049
	4.448	8.018
	5.346	2.463
	2.567	6.254
	3.629	4.66
	2.906	6.552
	3.898	5.284
	5.968	3.622
	2.987	2.465
	2.725	2.612
	3.577	4.971
	8.409	3.606
	4.37	2.749
	8.983	6.064
	2.709	11.346
	7.579	5.452
	4.278	3.265
	3.368	3.912
	9.157	3.983
	6.869	3.374
	5.725	2.835
	12.082	5.227
	2.938	2.987
	4.607	9.734
	4.058	12.96
	2.726	4.673
	3.026	2.415
	9.283	1.677
	4.943	7.305
	3.49	2.596
	6.613	1.649
	4.705	2.969
	3.355	3.453
	6.249	4.903
	5.242	3.261
	5.974	1.366
	3.526	1.3
	6.954	1.947
	2.171	2.529
	2.995	1.849
	2.291	1.81
	3.265	2.097
	5.401	1.741
	3.283	1.469
	3.277	1.758
	5.912	3.313
	9.362	4.033
	7.524	3.526
	4.909	7.731
	5.881	3.35
	4.513	5.963
	2.706	3.415
	2.311	4.704
	3.805	2.369
	2.908	1.687
	5.589	3.375
	3.875	3.093
	5.348	6.598
	4.066	6.323
	4.087	6.198
	2.255	6.362
	5.614	5.504
	5.387	2.918
	9.582	5.25
	5.516	2.753
	1.986	8.972
	7.483	2.732
	3.074	1.546
	4.506	4.65
	5.152	5.362
	5.33	3.575
	5.483	5.723
	3.686	1.469
	7.839	6.196
	3.486	4.714
	3.654	13.875
	3.072	6.322
	3.749	3.115
	9.429	2.415
	4.083	4.17
	4.383	2.279
	5.126	3.699
	10.415	5.379
	12.079	2.57
	20.2	4.647
	5.59	1.991
	7.717	1.731
	10.271	5.507
	5.627	2.576
	4.386	4.082
	2.966	3.206
	5.711	3.699
	5.079	6.532
	3.864	3.747
	5.079	1.719
	7.649	3.794
	5.082	5.887
	2.427	4.396
	6.198	4.653
	8.449	2.187
	10.56	4.558
	8.925	8.016
	8.12	3.805
	6.309	4.772
	3.526	4.059
	7.631	3.072
	4.577	2.477
	2.95	2.371
	7.301	1.911
	3.516	2.601
	4.355	2.326
	1.839	3.498
	7.635	2.528
	3.516	5.385
	2.13	5.616
	3.003	8.265
	2.787	2.995
	1.889	6.611
	5.521	5.401
	2.386	4.098
	2.463	3.355
	3.314	4.623
	5.62	4.495
	2.726	4.009
	2.226	5.949
	2.371	3.711
	5.769	2.13
	5.132	4.139
	5.09	2.601
	6.158	5.104
	4.449	4.306
	2.216	5.861
	8.028	2.834
	4.926	4.226
	3.201	3.672
	3.805	4.004
	3.012	5.204
	6.553	3.099
	4.077	3.391
	4.019	4.229
	2.61	6.72
	4.009	5.375
	2.766	2.601
	3.139	2.898
	4.284	2.549
	2.686	7.497
	2.843	3.672
	9.509	2.859
	5.202	4.347
	8.01	12.547
	5.003	3.064
	6.005	4.178
	3.864	3.313
	3.986	2.925
	4.731	5.557
	3.4	6.957
	3.31	6.994
	2.486	7.782
	8.064	2.66
	4.155	6.096
	5.29	7.819
	6.891	4.541
	6.969	5.358
	7.02	3.297
	7.012	4.432
	7.275	3.032
	6.045	3.211
	4.733	4.576
	8.55	3.162
	4.113	3.343
	5.153	1.971
	3.304	2.567
	4.235	12.884
	2.009	3.562
	9.229	9.315
	3.498	6.721
	2.868	3.577
	2.601	2.908
	4.044	2.052
	3.913	2.601
	12.027	4.689
	5.198	3.566
	5.58	4.89
	5.693	4.003
	7.219	4.406
	2.521	6.079
	4.118	3.857
	4.979	2.063
	5.907	12.034
	2.857	8.82
	6.576	3.931
	5.464	7.823
	2.672	4.156
	5.168	3.912
	5.903	5.025
	4.737	5.673
	4.969	3.256
	4.85	2.979
	4.225	3.694
	4.025	3.817
	2.841	2.683
	7.07	2.13
	5.808	3.847
	4.638	6.09
	8.297	4.332
	4.906	3.093
	4.109	1.62
	2.898	2.378
	4.702	2.391
	9.304	5.571
	4.881	7.084
	2.398	2.427
	3.542	2.898
	3.234	7.822
	3.976	5.086
	4.105	3.364
	4.705	3.265
	3.48	2.63
	4.364	2.493
	4.424	1.527
	2.7	1.207
	2.612	5.226
	3.733	9.08
	2.391	5.26
	4.974	6.213
	6.755	4.335
	9.886	6.795
	4.537	8.884
	7.037	2.437
	4.947	2.009
	5.503	3.377
	3.497	1.858
	4.061	2.216
	3.938	2.816
	4.092	2.519
	2.296	3.63
	2.371	1.836
	2.963	3.383
	5.283	3.818
	5.193	4.155
	4.425	1.839
	13.812	1.383
	15.282	2.918
	6.538	12.855
	2.601	5.27
	4.601	12.369
	4.893	10.935
	7.994	10.557
	12.965	3.355
	1.516	2.386
	1.624	3.697
	5.859	7.208
	2.296	6.544
	3.941	4.871
	2.271	3.77
	2.444	5.98
	2.709	2.018
	5.321	1.886
	6.653	2.995
	5.912	4.354
	2.76	3.678
	2.278	5.658
	7.876	2.85
	18.445	2.54
	8.334	1.911
	12.681	4.244
	13.13	3.139
	2.296	3.001
	4.511	3.918
	2.81	4.547
	3.134	2.521
	4.453	3.986
	3.629	2.916
	7.32	5.69
	3.654	4.792
	7.783	3.456
	8.3	2.709
	8.079	8.341
	5.351	5.213
	2.709	3.531
	3.081	3.074
	2.479	2.463
	4.145	3.292
	3.849	2.163
	4.354	2.187
	2.984	3.191
	2.056	2.278
	2.883	5.054
	2.556	2.226
	2.038	4.501
	4.519	4.817
	2.328	1.649
	2.895	2.226
	7.696	1.971
	8.034	1.558
	4.343	3.032
	4.035	1.731
	4.269	5.487
	4.37	4.139
	6.15	2.702
	3.218	7.706
	3.945	5.546
	3.794	6.138
	3.495	4.89
	4.325	8.494
	6.066	3.367
	7.283	4.644
	2.561	2.816
	7.338	5.743
	4.429	2.415
	2.808	1.886
	2.934	1.595
	2.3	1.353
	5.337	1.741
	4.015	4.754
	3.225	3.782
	2.643	4.356
	3.551	4.368
	2.469	2.549
	2.328	4.977
	3.389	2.163
	2.628	4.63
	13.988	2.398
	14.449	2.688
	2.687	3.095
	8.461	15.833
	5.65	4.763
	6.991	6.909
	2.788	3.115
	4.67	7.083
	9.61	4.711
	2.038	2.827
	1.846	5.675
	5.172	2.906
	3.036	3.905
	3.362	4.981
	5.401	2.987
	4.274	4.254
	2.126	4.915
	2.296	3.944
	1.807	3.192
	3.997	1.886
	2.801	5.088
	4.734	3.367
	3.432	4.772
	3.132	3.019
	1.596	11.155
	4.8	8.295
	6.017	4.461
	1.951	8.468
	3.187	4.445
	2.718	4.259
	4.15	2.876
	4.303	4.847
	5.583	2.683
	7.063	4.963
	2.185	3.415
	6.402	5.509
	3.303	3.556
	6.71	3.116
	2.903	5.223
	6.362	3.093
	2.879	4.351
	20.565	4.554
	9.691	3.041
	7.432	3.026
	7.113	4.806
	3.184	4.075
	3.73	11.139
	2.596	2.615
	8.652	3.098
	7.877	4.915
	6.098	2.808
	6.963	4.686
	3.359	7.055
	2.463	3.178
	2.674	7.108
	3.859	5.335
	5.455	4.348
	2.398	14.814
	4.011	6.895
	4.987	3.543
	2.674	5.275
	5.003	4.569
	7.001	10.13
	2.063	3.176
	4.269	6.276
	1.846	3.577
	2.038	7.346
	2.528	4.427
	2.952	3.271
	3.055	3.458
	2.683	3.401
	4.956	8.915
	3.039	10.746
	5.4	3.63
	6.038	2.415
	3.633	4.449
	1.649	3.801
	4.757	2.592
	4.201	2.512
	2.908	2.908
	9.574	3.678
	1.864	6.736
	4.797	4.218
	10.721	4.104
	4.895	3.139
	3.154	2.601
	7.464	3.895
	5.494	4.363
	5.846	2.918
	4.799	4.047
	7.274	2.427
	8.601	7.837
	5.344	6.683
	6.983	4.368
	3.289	14.422
	3.062	3.254
	3.313	5.339
	2.203	3.605
	1.884	10.567
	3.115	8.642
	3.577	8.389
	4.201	8.089
	13.563	3.894
	9.587	2.656
	3.431	8.179
	2.637	4.83
	4.635	3.864
	2.835	4.244
	4.478	2.808
	3.304	8.113
	3.223	2.7
	3.015	5.319
	3.901	17.806
	3.513	3.573
	3.475	2.369
	2.369	3.505
	3.093	3.588
	4.598	6.996
	2.369	3.446
	3.616	4.028
	2.528	3.355
	3.516	9.856
	2.601	6.132
	6.562	11.389
	3.691	5.048
	2.754	12.684
	2.359	5.323
	5.382	3.85
	7.836	2.468
	3.912	1.956
	4.374	5.47
	3.672	3.408
	3.274	2.87
	7.504	4.577
	6.414	3.07
	7.885	3.451
	6.357	8.213
	5.561	5.086
	5.764	4.757
	4.3	3.41
	3.922	3.483
	8.867	6.643
	10.257	8.945
	4.665	2.706
	3.894	2.386
	3.432	5.582
	2.709	2.601
	7.892	4.368
	2.56	3.655
	6.306	3.265
	7.346	4.059
	2.612	7.895
	5.144	5.671
	2.311	6.411
	2.309	6.786
	7.388	5.194
	6.219	5.083
	4.671	4.602
	3.35	5.743
	3.582	4.955
	4.136	6.052
	6.382	4.11
	17.562	5.299
	10.792	9.026
	10.352	2.787
	5.149	2.415
	6.677	6.609
	7.853	2.216
	7.716	4.148
	3.574	4.265
	2.247	4.407
	5.282	4.406
	2.203	5.077
	6.214	5.825
	3.716	3.396
	5.293	3.093
	4.745	11.257
	3.698	4.775
	8.473	10.341
	4.475	4.894
	4.497	4.098
	3.132	3.376
	2.567	4.83
	4.235	2.531
	5.144	4.712
	2.749	2.672
	2.519	3.198
	5.729	3.176
	3.829	8.086
	8.406	3.342
	3.415	2.835
	6.597	4.387
	3.622	2.326
	7.171	2.55
	6.73	2.521
	1.771	2.049
	2.934	2.876
	2.278	6.369
	9.776	3.026
	2.412	2.918
	3.055	3.001
	2.87	2.077
	2.612	3.24
	1.911	3.929
	5.229	2.278
	3.024	2.523
	3.597	2.278
	3.124	4.37
	4.277	2.097
	9.742	5.633
	10.379	4.29
	7.265	4.751
	3.674	4.502
	4.727	3.189
	2.465	2.851
	5.903	4.651
	1.864	3.904
	5.464	5.429
	3.265	5.633
	3.297	3.691
	7.659	3.483
	2.127	4.973
	3.566	5.025
	4.234	5.512
	6.885	5.807
	3.458	3.451
	1.708	4.398
	7.572	5.448
	4.268	6.899
	4.498	7.307
	4.194	2.226
	1.932	8.092
	5.371	9.537
	3.66	2.753
	11.447	5.136
	4.044	4.753
	2.038	7.039
	3.762	2.827
	3.076	5.626
	2.415	3.476
	2.672	4.085
	15.792	4.094
	6.877	3.571
	5.932	4.011
	3.356	6.303
	5.062	3.596
	3.282	3.759
	8.265	3.703
	4.615	4.45
	6.509	4.345
	4.149	4.966
	4.514	3.049
	3.154	4.656
	3.266	4.633
	7.42	4.227
	3.971	2.852
	5.548	2.806
	10.428	4.808
	4.501	4.708
	3.371	4.775
	3.095	4.778
	2.946	4.177
	2.757	3.735
	3.081	5.366
	6.734	5.213
	2.601	5.324
	2.097	6.974
	11.562	3.057
	11.89	7.662
	5.116	4.56
	5.69	2.386
	6.676	3.095
	4.232	6.106
	2.656	3.961
	8.059	2.753
	2.766	2.415
	11.594	2.594
	7.831	2.742
	15.347	2.76
	2.71	6.014
	4.948	5.214
	3.531	3.15
	5.762	3.584
	9.815	2.787
	6.801	3.394
	4.533	7.532
	4.755	3.901
	4.973	4.185
	2.187	3.931
	4.071	4.323
	3.337	2.376
	4.44	4.099
	2.038	4.321
	6.954	6.728
	2.728	8.476
	4.514	4.944
	2.612	3.242
	3.668	8.582
	3.145	4.083
	2.173	3.192
	6.973	2.981
	7.277	4.981
	5.077	3.63
	3.242	2.288
	6.985	5.182
	8.639	4.3
	10.216	3.357
	3.24	4.77
	2.601	3.796
	6.082	3.522
	4.969	2.4
	3.139	4.244
	3.621	5.931
	5.319	2.987
	4.068	4.342
	2.802	6.01
	4.173	3.507
	3.072	2.487
	3.621	3.719
	2.038	2.596
	3.562	3.024
	4.501	2.783
	4.476	3.269
	3.377	2.54
	3.265	13.541
	2.468	4.304
	3.967	3.371
	2.086	5.298
	8.857	5.997
	4.198	3.981
	7.497	2.667
	4.523	8.306
	3.744	4.019
	4.614	5.1
	3.237	3.292
	5.926	3.569
	3.624	7.03
	5.302	3.471
	4.965	10.406
	4.253	3.412
	3.691	7.07
	6.142	3.049
	4.26	4.256
	6.038	7.105
	3.36	3.77
	4.173	3.996
	2.512	5.336
	3.643	6.991
	3.306	5.271
	2.87	3.518
	3.955	4.482
	2.683	3.678
	3.088	4.455
	8.071	3.586
	2.415	5.622
	3.594	6.198
	2.505	6.783
	3.211	11.125
	2.378	7.635
	1.932	4.983
	2.141	8.842
	12.752	5.261
	10.888	5.078
	4.51	5.821
	3.048	4.323
	2.16	2.235
	3.526	2.009
	10.239	2.934
	4.049	2.72
	8.296	3.453
	8.131	2.519
	8.306	3.702
	3.901	4.088
	3.024	3.917
	3.795	9.815
	3.711	12.324
	7.648	6.247
	8.83	9.761
	7.184	4.593
	5.523	5.479
	7.149	4.287
	5.892	3.132
	2.378	4.648
	4.354	3.805
	3.807	3.505
	4.363	5.186
	4.834	4.721
	6.983	4.871
	2.898	3.11
	4.513	4.239
	3.942	3.311
	3.431	3.432
	4.301	2.278
	9.959	3.463
	2.827	2.465
	3.085
	8.658
	5.655
	8.402
	12.671
	4.734
	10.725
	12.615
	2.616
	4.038
	3.093
	2.827
	4.598
	3.119
	6.81
	2.61
	3.074
	14.49
	5.298
	3.247
	4.597
	5.133
	3.566
	3.749
	2.601
	6.601
	3.931
	11.013
	4.229
	1.956
	2.567
	4.045
	2.876
	3.59
	2.486
	4.021
	6.693
	4.772
	2.278
	9.845
	7.64
	4.044
	3.995
	5.203
	7.465
	3.39
	2.906
	1.956
	2.029
	3.78
	4.224
	4.994
	4.668
	6.156
	6.055
	6.223
	3.149
	3.523
	2.934
	1.781
	4.11
	2.359
	6.281
	9.605
	9.51
	8.858
	7.143
	6.286
	10.495
	6.928
	8.806
	6.121
	19.176
	8.151
	4.057
	2.667
	2.528
	3.975
	3.416
	2.398
	5.595
	5.498
	1.687
	2.371
	3.894
	5.531
	5.868
	5.52
	3.908
	3.48
	4.558
	3.805
	2.976
	2.91
	5.635
	3.518
	10.458
	9.729
	3.912
	11.656
	7.059
	7.705
	3.767
	5.401
	3.341
	3.077
	3.037
	1.823
	2.924
	3.178
	2.331
	14.821
	15.356
	6.75
	6.637
	5.529
	5.779
	15.903
	3.185
	4.55
	2.777
	2.938
	2.122
	4.718
	8.015
	3.616
	2.902
	3.754
	24.104
	18.152
	12.074
	2.855
	7.03
	2.648
	7.997
	8.113
	7.455
	3.242
	9.763
	6.93
	7.451
	2.924
	10.302
	2.296
	2.187
	4.465
	9.812
	7.938
	12.696
	5.111
	5.283
	3.91
	6.209
	3.07
	4.563
	3.229
	5.165
	5.298
	3.191
	2.601
	11.604
	4.104
	3.135
	4.686
	10.352
	3.516
	5.996
	3.505
	3.166
	3.262
	5.088
	5.33
	7.481
	6.464
	4.242
	6.165
	2.709
	10.56
	7.085
	5.067
	10.845
	5.19
	4.884
	7.026
	5.837
	5.672
	7.671
	9.758
	13.3
	8.342
	4.002
	5.249
	3.984
	4.009
	3.614
	4.7
	4.154
	5.064
	2.734
	3.157
	5.092
	4.757
	3.981
	3.668
	5.31
	5.256
	7.929
	4.653
	2.226
	2.097
	2.437
	2.226
	2.075
