# Supplementary material for: Combined forces of hydrostatic pressure and actin polymerization drive endothelial tip cell migration and sprouting angiogenesis
Source: eLife. 2025 Feb 20;13:RP98612. doi: 10.7554/eLife.98612 (PMC11841990; doi:10.7554/eLife.98612)
Supplement: Figure 7—source data 1. [file elife-98612-fig7-data1.xlsx]

## Sheet: Figure 7E
	Figure 7 - Source Data 1
	Figure 7E: ISV length (µm) at 28 hpf (pool data from 2 independent experiments)
	wild type	wild type Lat.B	aqp1a.1-/-aqp8a.1-/-	aqp1a.1-/-aqp8a.1-/- Lat.B			wild type	wild type Lat.B	aqp1a.1-/-aqp8a.1-/-	aqp1a.1-/-aqp8a.1-/- Lat.B		ANOVA summary
												F	82.7
												P value	<0.0001
	114.9	67.594	102.039	0		Number of values	60	68	126	112		P value summary	****
	116.784	59.504	101.87	0								Significant diff. among means (P < 0.05)?	Yes
	110.873	62.208	102.368	36.287		Minimum	61.28	0	0	0		R squared	0.4067
	111.671	67.871	58.657	31.341		25% Percentile	102.5	54.62	40.6	26.97
	107.762	77.422	61.28	47.08		Median	108.3	65.62	58.38	47.36		Brown-Forsythe test
	101.158	50.529	92.219	38.036		75% Percentile	113.5	74.58	85.53	62.68		F (DFn, DFd)	14.54 (3, 362)
	76.709	77.024	85.49	43.617		Maximum	122.6	121.7	114.7	105.7		P value	<0.0001
	113.161	53.705	72.356	43.993								P value summary	****
	111.562	66.227	40.844	33.847		Mean	105.5	65.56	58.74	43.56		Are SDs significantly different (P < 0.05)?	Yes
	108.485	64.085	61.192	53.831		Std. Deviation	13	20.84	30.28	25.14
	103.765	54.159	46.035	53.564		Std. Error of Mean	1.678	2.528	2.698	2.376		Bartlett's test
	96.226	51.855	64.056	0								Bartlett's statistic (corrected)	48.28
	117.825	35.761	35.612	27.063		Lower 95% CI	102.1	60.52	53.4	38.86		P value	<0.0001
	112.972	63.325	30.36	41.211		Upper 95% CI	108.9	70.61	64.08	48.27		P value summary	****
	112.438	92.36	50.968	0								Are SDs significantly different (P < 0.05)?	Yes
	110.227	51.417	24.069	54.11
	108.371	74.582	21.247	24.551		"0" means that there is no ISV in this position						ANOVA table	SS	DF	MS	F (DFn, DFd)	P value
	95.813	55.08	27.249	40.482								Treatment (between columns)	153426	3	51142	F (3, 362) = 82.70	P<0.0001
	104.99	57.493	0	0								Residual (within columns)	223851	362	618.4
	111.32	0	39.797	13.927								Total	377277	365
	105.635	69.494	56.465	39.961
	114.101	116.163	41.728	73.702								Data summary
	72.086	96.277	105.205	79.869								Number of treatments (columns)	4
	107.506	88.192	99.544	63.168								Number of values (total)	366
	119.534	68.408	48.575	83.416
	93.227	70.882	90.064	68.981								Multiple comparisons
	103.077	84.521	43.656	58.059								Šídák's multiple comparisons test	Mean Diff.	95.00% CI of diff.	Below threshold?	Summary	Adjusted P Value
	61.279	0	56.168	72.285								wt vs. wt+LatB	39.94	28.57 to 51.31	Yes	****	<0.0001
	102.251	52.284	45.082	58.634								wt vs. aqp1a.1-/-;aqp8a.1-/-	46.76	36.69 to 56.83	Yes	****	<0.0001
	97.84	60.151	0	14.083								wt+LatB vs. aqp1a.1-/-;aqp8a.1-/- +LatB	22	12.13 to 31.87	Yes	****	<0.0001
	118.341	60.231	45.158	70.801								aqp1a.1-/-;aqp8a.1-/- vs. aqp1a.1-/-;aqp8a.1-/- +LatB	15.18	6.839 to 23.52	Yes	****	<0.0001
	109.627	73.847	19.911	54.488								wt+LatB vs. aqp1a.1-/-;aqp8a.1-/-	6.82	-2.843 to 16.48	No	ns	0.3013
	109.902	41.75	106.067	0
	110.883	27.658	27.858	54.913								Test details	Mean 1	Mean 2	Mean Diff.	SE of diff.	n1	n2	t	DF
	103.196	87.528	0	63.784								wt vs. wt+LatB	105.5	65.56	39.94	4.405	60	68	9.068	362
	94.213	74.405	95.829	0								wt vs. aqp1a.1-/-;aqp8a.1-/-	105.5	58.74	46.76	3.901	60	126	11.99	362
	116.018	69.825	32.719	0								wt+LatB vs. aqp1a.1-/-;aqp8a.1-/- +LatB	65.56	43.56	22	3.823	68	112	5.754	362
	106.512	59.511	69.092	50.308								aqp1a.1-/-;aqp8a.1-/- vs. aqp1a.1-/-;aqp8a.1-/- +LatB	58.74	43.56	15.18	3.229	126	112	4.7	362
	105.745	69.533	104.602	33.328								wt+LatB vs. aqp1a.1-/-;aqp8a.1-/-	65.56	58.74	6.82	3.742	68	126	1.823	362
	111.423	102.228	101.741	48.78
	104.627	61.727	49.83	0
	64.237	74.982	41.304	44.001
	112.829	72.791	44.941	64.632
	104.987	73.862	50.147	25.833
	108.141	77.093	104.212	40.216
	107.785	59.752	73.808	0
	114.934	69.305	54.584	39.629
	80.979	74.578	72.977	0
	119.764	71.336	49.649	37.075
	121.651	73.238	26.187	0
	122.639	61.839	20.566	39.225
	120.662	64.33	53.345	41.193
	97.368	61.488	49.878	38.685
	95.529	54.838	51.871	61.262
	113.795	53.996	52.847	51.783
	116.988	121.684	16.889	39.283
	106.826	71.925	42.639	105.657
	113.599	84.135	24.992	79.225
	103.957	87.351	0	58.368
	89.443	98.833	0	80.489
		65.021	45.921	71.977
		85.02	0	49.336
		56.08	39.496	62.582
		54.545	65.51	45.934
		46.879	85.645	88.176
		44.827	94.148	19.045
		32.116	85.873	72.741
		49.59	104.458	50.936
			57.508	57.291
			63.253	63.311
			36.362	95.081
			61.487	72.223
			61.234	63.172
			35.956	67.029
			0	58.008
			17.677	37.585
			47.255	53.174
			67.885	24.59
			0	26.938
			95.128	0
			60.212	47.637
			29.801	0
			48.729	0
			53.396	36.227
			103.696	59.019
			106.692	67.475
			97.237	81.057
			95.273	48.272
			73.485	62.707
			96.001	63.123
			71.209	65.597
			65.831	33.934
			54.097	25.677
			62.208	41.92
			69.8	0
			61.819	28.344
			58.934	0
			59.888	20.21
			67.858	62.039
			65.416	63.968
			26.797	68.203
			0	66.805
			39.848	58.167
			24.637	50.948
			19.125	57.453
			113.708	28.907
			62.471	55.28
			58.608	54.345
			58.156	36.564
			97.991	22.482
			59.014	51.348
			61.757	24.296
			60.508
			41.822
			53.063
			52.866
			49.004
			59.798
			103.454
			114.735
			107.866
			102.9
			103.65
			106.163
			75.753
			93.658
