# Supplementary material for: Combined forces of hydrostatic pressure and actin polymerization drive endothelial tip cell migration and sprouting angiogenesis
Source: eLife. 2025 Feb 20;13:RP98612. doi: 10.7554/eLife.98612 (PMC11841990; doi:10.7554/eLife.98612)
Supplement: Supplementary file 1. [file elife-98612-supp1.xlsx]

## Sheet: Sheet 1
Supplementary File 1. Plasmids used in this study.
Plasmid name	Plasmid backborne	Method of generation	Reference	Experiment	Comments
pMiniT-aqp1a.1	pMiniT 2.0 (NEB)	PCR cloning	This paper	Fig.1-fig.suppl.1, Fig.3-fig.suppl.1D	Used for riboprobe synthesis and In-fusion cloning
pMiniT-aqp8a.1	pMiniT 2.0 (NEB)	PCR cloning	This paper	Fig.1-fig.suppl.1, Fig.3-fig.suppl.2D	Used for riboprobe synthesis and In-fusion cloning
fli1ep:aqp1a.1-mEmerald	pDestTol2CG2-crybb1:mKate2	In-Fusion cloning	This paper	Fig.2A	Used to generate Tg(fli1ep:aqp1a.1-mEmerald) transgenic line
fli1ep:aqp8a.1-mEmerald	pDestTol2CG2-crybb1:mKate2	In-Fusion cloning	This paper	Fig.2B	Used to generate Tg(fli1ep:aqp8a.1-mEmerald) transgenic line
kdrl:mEmerald	pDs-MCS	In-Fusion cloning	This paper	Fig.5	In vivo cell volume analysis
6xUAS:aqp1a.1-P2A-EGFP-T2A-mKate2-CAAX	pDs-MCS	In-Fusion cloning	This paper	Fig.5	Overexpression of Aqp1a.1 protein
fli1ep:nlsEGFP-P2A-mKate2-GM130	pDs-MCS	In-Fusion cloning	This paper	Fig.4-fig.suppl.1D	Assessment of tip cell polarization
pDestTolpA2-kdrl:mito-roGFP2-Orp1			Gift from Massimo M. Santoro (University of Turin, Italy)		Used as a source of kdrl promoter
pNLS-AcTP-SP6			Gift from Sergei Parinov (TLL, Singapore)		Used for Ac transposase mRNA synthesis
pCS-TP			Gift from Koichi Kawakami (National Institute of Genetics, Japan)		Used for Tol2 transposase mRNA syntesis
pDs-MCS			Gift from Sergei Parinov (TLL, Singapore)		Used as a Ds transposon source for In-Fusion cloning
pDestTol2CG2-crybb1:mKate2			Gift from Darren Gilmour (EMBL, Heidelberg)		Used as a backbone for In-Fusion cloning
p5E-fli1ep			Gift from Nathan Lawson (Univ. Massachusetts Medical School)		Used as a source of fli1ep promotor
pCMV:mEmerald-N1			Addgene plasmid #53976		Used as a source of mEmerald protein
pDestTol2-fli1ep:mCherry-GM130			Gift from Darren Gilmour (EMBL, Heidelberg)		Used as a source of GM130 protein
