# Supplementary material for: Combined forces of hydrostatic pressure and actin polymerization drive endothelial tip cell migration and sprouting angiogenesis
Source: eLife. 2025 Feb 20;13:RP98612. doi: 10.7554/eLife.98612 (PMC11841990; doi:10.7554/eLife.98612)
Supplement: Supplementary file 2. [file elife-98612-supp2.xlsx]

## Sheet: Sheet1
Supplementary File 2. Oligonucleotides used in this study.
Primers for genotyping	Sequence, 5'-3'
aqp1a.1-F1	CGCCTCCAGATTCATTAGCAGGA
aqp1a.1-i1R	GTAAGTGAACTGCTGCCAGTGA
aqp8a.1-fwd	GGATCAATTGAGTTGCATAACAGAC
aqp8a.1-i1R	CTGTAATGTAGACTTGTAAAGTGGA
Primers for the full-length cDNA cloning
aqp1a.1-F1	CGCCTCCAGATTCATTAGCAGGA
aqp1a.1-R1	CCTGAGGTACATACTGATTCGCTGA
aqp8a.1-F	CCGGGCAGAAATCAAAAAT
aqp8a.1-R	GCTTGCAATCCTCTTCAGTTC
qPCR primers
aqp1a1-qPCRfwd	GGGACTGAATCAAATCCACACAG
aqp1a1-qPCRrev	AACCTGATGGCTGTCAGATGT
aqp8a1-qPCRfwd	GGAAATCAGTGGTGGTCACTTCA
aqp8a1-qPCRrev	TTGTAGTCACAGCTTTGGCAAG
gapdh-Fwd	GCTGGTATTGCTCTCAACGATCA
gapdh-Fwd	ATGGGAGAATGGTCGCGTATCA
dll4-fwd	TGGCCAGTTATCCTGTCTCC
dll4-rev	CTCACTGCATCCCTCCAGAC
tm4sf18-fwd	CTGGATACTGCTTCCTGATCTC
tm4sf18-rev	CAAACAGATACCGTCCCTCAT
hAQP1-fwd	CTGGGCATCGAGATCATCGG
hAQP1-rev	ATCCCACAGCCAGTGTAGTCA
hGAPDH-fwd	GCCACATCGCTCAGACACCAT
hGAPDH-rev	TGAAGGGGTCATTGATGGCAACA
Oligos for aqp1a.1 and aqp8a.1 sgRNA construction
tracrRNA	AAAAGCACCGACTCGGTGCCACTTTTTCAAGTTGATAACGGACTAGCCTTATTTTAACTTGCTATTTCTAGCTCTAAAAC
sgRNAaqp1a.1	ATTTAGGTGACACTATAGACAGCTGGCCAGCAGACCCGTTTTAGAGCTAGAAATAGCAAG
sgRNAaqp8a.1	ATTTAGGTGACACTATAGATGTCTCCCCCATCGCCCGGTTTTAGAGCTAGAAATAGCAAG
